# Supplementary material for: Thermodynamic evaluation of the impact of DNA mismatches in PCR-type SARS-CoV-2 primers and probes
Source: bioRxiv or medRxiv preprint supplement (doi:10.1101/2020.11.04.368449), 2020-11-05
Supplement: Supplementary file [file media-1.pdf]

# Supplementary information: Thermodynamic evaluation of the impact of DNA mismatches in PCR-type SARS-CoV-2 primers and probes

Pâmella Miranda<sup>a,b</sup>, Gerald Weber<sup>a,\*</sup>

<sup>a</sup>*Departamento de Física, Universidade Federal de Minas Gerais, Belo Horizonte-MG, Brazil*

<sup>b</sup>*Programa Interunidades de Pós-Graduação em Bioinformática, Universidade Federal de Minas Gerais, Belo Horizonte-MG, Brazil*

---

---

## List of Figures

|    |                                                       |   |
|----|-------------------------------------------------------|---|
| S1 | Displacement profile for SARS-CoV-2_89_RIGHT. . . . . | 2 |
|----|-------------------------------------------------------|---|

## List of Tables

|    |                                                                      |    |
|----|----------------------------------------------------------------------|----|
| S1 | List of SARS-CoV-2 genome accession codes. . . . .                   | 3  |
| S2 | List of SARS-CoV-1 genome accession codes. . . . .                   | 25 |
| S3 | List of coronavirus (non-SARS) genome accession codes. . . . .       | 26 |
| S4 | Primers and probes used in this work. . . . .                        | 27 |
| S5 | Reference melting temperatures and coverages for SARS-CoV-2. . . . . | 44 |
| S6 | Coverages for SARS-CoV-1 genomes. . . . .                            | 61 |
| S7 | Coverages for other coronaviruses genomes. . . . .                   | 78 |

---

\*Corresponding author

*Email addresses:* pamella.mm@gmail.com (Pâmella Miranda), gweber@ufmg.br (Gerald Weber)

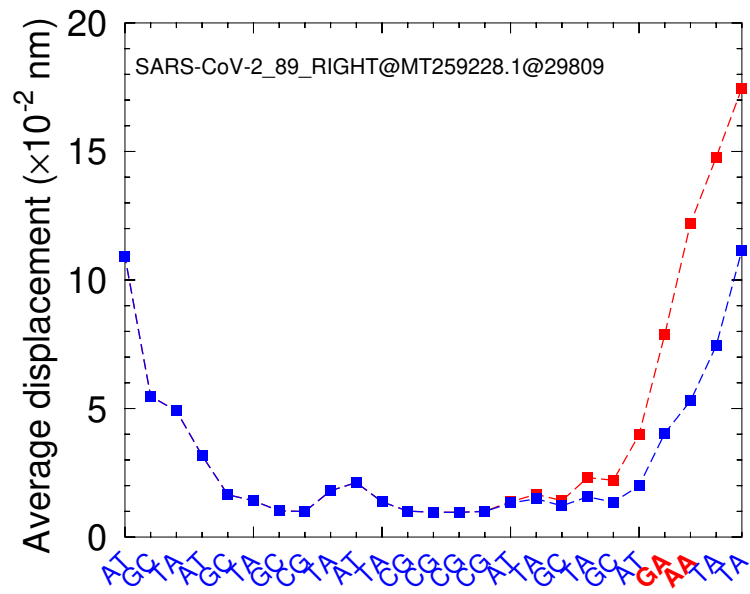

Figure S1: Displacement profile for SARS-CoV-2\_89\_RIGHT when aligned to SARS-COV-2 MT259228.1 at position 29809 has consecutive GA-AA mismatches (red symbols) instead of AT-AT base pairs (blue symbols).

Table S1: List of SARS-CoV-2 genome accession codes. Contiguous genome codes such as LR794478.1 to LR794483.1 are shown in compact notation LR7944(78–83).1

|                 |                  |                 |                  |                   |
|-----------------|------------------|-----------------|------------------|-------------------|
| LC52823(2,3).1  | LC529905.1       | LC53441(8,9).1  | LC542809.1       | LC542976.1        |
| LC546038.1      | LC5475(18–33).1  | LC549340.1      | LC55325(7,8).1   | LC553259.2        |
| LC55326(0–3).1  | LC5532(69,70).1  | LC5563(15–24).1 | LC5654(07–14).1  | LC5678(45–59).1   |
| LC57096(1–3).1  | LC5709(67–99).1  | LC5710(02–13).1 | LC571019.1       | LC57102(2–5).1    |
| LC57103(0,1).1  | LC5710(34–41).1  | LC5720(67–70).1 | LC5732(73–86).1  | LC573289.1        |
| LR75799(5–8).1  | LR793257.1       | LR7943(80–91).1 | LR794(398–401).1 | LR7944(05–12).1   |
| LR794414.1      | LR79441(7,8).1   | LR79442(0–7).1  | LR79443(0–4).1   | LR794437.1        |
| LR79444(0–3).1  | LR794446.1       | LR79444(8,9).1  | LR7944(58–62).1  | LR79446(4–7).1    |
| LR7944(69–71).1 | LR794473.1       | LR7944(78–83).1 | LR79448(5–8).1   | LR79449(0–6).1    |
| LR794498.1      | LR7945(00–14).1  | LR79451(6–9).1  | LR79452(2,3).1   | LR7945(25–32).1   |
| LR7945(35–42).1 | LR79454(4–6).1   | LR7945(48–52).1 | LR79455(4–6).1   | LR7945(58–62).1   |
| LR79456(4–6).1  | LR7945(69–73).1  | LR794575.1      | LR79457(7,8).1   | LR79458(0–2).1    |
| LR794584.1      | LR79458(7,8).1   | LR79459(1–3).1  | LR794598.1       | LR79460(2,3).1    |
| LR79460(5–7).1  | LR7946(09–11).1  | LR794613.1      | LR7946(19–21).1  | LR7946(25–33).1   |
| LR79463(7–9).1  | LR79464(1–3).1   | LR7946(45–55).1 | LR7946(57–62).1  | LR79466(5–8).1    |
| LR79467(0,1).1  | LR794673.1       | LR7946(75–82).1 | LR794684.1       | LR81(3996–4000).1 |
| LR814001.2      | LR814002.4       | LR81400(3,4).3  | LR81400(5–7).2   | LR814008.3        |
| LR8140(09–13).2 | LR81402(0–3).2   | LR814024.3      | LR81402(5–9).2   | LR814030.3        |
| LR81403(1–4).2  | LR81403(5,6).3   | LR81403(7–9).2  | LR814040.3       | LR814041.4        |
| LR81404(2–6).2  | LR814047.4       | LR814048.3      | LR8141(09,10).1  | LR814111.2        |
| LR81411(2–5).1  | LR8141(18–23).1  | LR81412(6,7).1  | LR814128.4       | LR81413(0–3).1    |
| LR81413(5–8).1  | LR81414(1–3).1   | LR8141(46–50).1 | LR81415(2–6).1   | LR814157.3        |
| LR8141(58–62).1 | LR814163.3       | LR81416(4,5).1  | LR814166.3       | LR8141(67–80).1   |
| LR814183.1      | LR814184.2       | LR814185.1      | LR814186.2       | LR8141(89–92).1   |
| LR814193.2      | LR814(196–200).1 | LR814201.2      | LR814202.1       | LR814205.3        |

(continued on next page)

(Table S1 continued)

|                  |                  |                  |                   |                  |
|------------------|------------------|------------------|-------------------|------------------|
| LR81420(6,7).2   | LR8142(08–11).1  | LR814214.1       | LR814215.3        | LR814216.2       |
| LR814219.2       | LR81422(0–5).1   | LR8142(28–33).1  | LR8142(36–40).1   | LR814243.3       |
| LR8142(44–63).1  | LR8142(66–72).1  | LR81556(3–8).1   | LR81557(4,5).3    | LR81557(6–9).1   |
| LR815581.1       | LR82182(0,1).1   | LR821822.3       | LR82182(3,4).1    | LR821826.3       |
| LR821827.1       | LR821828.3       | LR8218(29–41).1  | LR821842.3        | LR821843.1       |
| LR821844.2       | LR82184(5–9).1   | LR821850.2       | LR82185(1–3).1    | LR821854.2       |
| LR821855.1       | LR8218(57–64).1  | LR821865.4       | LR8218(66–74).1   | LR821875.3       |
| LR82187(6–8).1   | LR821879.4       | LR821880.1       | LR821881.4        | LR82188(2–7).1   |
| LR821888.3       | LR8218(89–95).1  | LR821896.4       | LR821897.1        | LR821898.2       |
| LR821(899–911).1 | LR821912.3       | LR8219(13–33).1  | LR82193(4,5).4    | LR821936.1       |
| LR821937.2       | LR8219(38–50).1  | LR821951.3       | LR82195(2–5).1    | LR821956.3       |
| LR82195(7–9).1   | LR821960.2       | LR82196(1,2).1   | LR821963.3        | LR8219(64–75).1  |
| LR821976.4       | LR82197(7,8).1   | LR821979.4       | LR821980.1        | LR821981.2       |
| LR821982.3       | LR82198(3–5).1   | LR8219(87–91).1  | LR821992.4        | LR821993.1       |
| LR821994.2       | LR82199(5–8).1   | LR821999.3       | LR82200(0–5).1    | LR824035.1       |
| LR824(037–130).1 | LR824(132–485).1 | LR82448(7,8).1   | LR824(490–531).1  | LR82456(3–7).1   |
| LR82457(0,1).1   | LR824(599,600).1 | LR860(559–655).1 | LR860(688–707).1  | LR8607(36–61).1  |
| LR86077(5–7).1   | LR860(792–811).1 | LR8608(40–66).1  | LR86089(5–9).1    | LR86091(3,4).1   |
| LR861(051–100).1 | LR86110(2–7).1   | LR8614(84–96).1  | LR8616(66–77).1   | LR86168(7–9).1   |
| LR862(399–407).1 | LR862(439–507).1 | LR87718(1–3).1   | LR877186.1        | LR877330.1       |
| LR877(382–431).1 | LR877(721–825).1 | LR877883.1       | LR87(7886–8363).1 | LR880(573–644).1 |
| LR881(869–933).1 | LR8820(37–49).1  | LR882(062–374).1 | LR882(380–492).1  | MN908947.3       |
| MN938384.1       | MN975262.1       | MN985325.1       | MN98866(8,9).1    | MN988713.1       |
| MN99446(7,8).1   | MN9965(27–31).1  | MN997409.1       | MT007544.1        | MT012098.1       |
| MT0195(29–33).1  | MT020781.2       | MT02088(0,1).1   | MT02706(2–4).1    | MT034054.1       |
| MT03987(3,4).1   | MT03988(7,8).1   | MT039890.1       | MT04425(7,8).1    | MT049951.1       |
| MT05049(1–3).1   | MT066156.1       | MT06617(5,6).1   | MT072688.1        | MT077125.1       |
| MT0798(43–54).1  | MT093571.1       | MT093631.2       | MT10605(2–4).1    | MT11441(2–9).1   |

(continued on next page)

(Table S1 continued)

|                  |                  |                  |                  |                  |
|------------------|------------------|------------------|------------------|------------------|
| MT118835.1       | MT121215.1       | MT123290.1       | MT12329(1–3).2   | MT126808.1       |
| MT13504(1–4).1   | MT152824.1       | MT1597(05–22).2  | MT1637(16–21).1  | MT18490(7–9).2   |
| MT18491(0–3).1   | MT186683.1       | MT1883(39–41).1  | MT192759.1       | MT192765.1       |
| MT19277(2,3).1   | MT198651.1       | MT198652.2       | MT198653.1       | MT21519(4,5).1   |
| MT226610.1       | MT230904.1       | MT2335(19–23).1  | MT233526.1       | MT240479.1       |
| MT2464(49–90).1  | MT246667.1       | MT2519(72–80).1  | MT2526(77–91).1  | MT252(693–710).1 |
| MT2527(12–33).1  | MT2527(35–50).1  | MT2527(52–64).1  | MT2527(67–70).1  | MT2527(72–89).1  |
| MT252(791–807).1 | MT2528(09–20).1  | MT25282(2,3).1   | MT253(696–710).1 | MT25691(7,8).1   |
| MT256924.2       | MT2583(77–83).1  | MT2592(26–31).1  | MT2592(35–87).1  | MT262(896–916).1 |
| MT262993.1       | MT263074.1       | MT263(381–465).1 | MT26346(7–9).1   | MT2701(01–14).1  |
| MT27081(4,5).1   | MT27632(3,4).1   | MT27632(5,6).2   | MT276327.1       | MT276328.2       |
| MT276329.1       | MT276330.2       | MT27659(7,8).1   | MT276600.1       | MT281577.1       |
| MT2918(26–34).1  | MT291835.2       | MT291836.1       | MT2925(69–75).1  | MT293156.1       |
| MT2931(58–92).1  | MT293(194–202).1 | MT2932(04–13).1  | MT29321(5,6).1   | MT2932(18–20).1  |
| MT293222.1       | MT29322(4,5).1   | MT29546(4,5).1   | MT300186.2       | MT3044(74–91).1  |
| MT30870(2–4).1   | MT318827.1       | MT320538.2       | MT320891.2       | MT32239(4–8).1   |
| MT3224(00–24).1  | MT324062.1       | MT324684.1       | MT325(561–640).1 | MT32602(3,4).1   |
| MT3260(27–30).1  | MT32603(5,6).1   | MT3260(39–42).1  | MT326046.1       | MT32604(8,9).1   |
| MT32605(1–6).1   | MT326058.1       | MT326061.1       | MT326063.1       | MT3260(65–71).1  |
| MT32607(4–6).1   | MT326078.1       | MT3260(81–97).1  | MT326(099,100).1 | MT32610(3–6).1   |
| MT32611(1–3).1   | MT3261(16–21).1  | MT32612(3–5).1   | MT3261(27–30).1  | MT32613(2–8).1   |
| MT326140.1       | MT3261(48–54).1  | MT3261(58–62).1  | MT326164.1       | MT32616(6,7).1   |
| MT326169.1       | MT326173.1       | MT326178.1       | MT32618(0,1).1   | MT32618(4,5).1   |
| MT326187.1       | MT32619(0,1).1   | MT327745.1       | MT32803(2–5).1   | MT334523.1       |
| MT334526.1       | MT334529.1       | MT334531.1       | MT3345(33–42).1  | MT334544.1       |
| MT33454(6,7).1   | MT334557.1       | MT334561.1       | MT3390(39–41).1  | MT339043.1       |
| MT3449(44–63).1  | MT34579(8,9).1   | MT34580(1–3).1   | MT34580(5,6).1   | MT34580(8,9).1   |
| MT34581(1,2).1   | MT34581(4–7).1   | MT345819.1       | MT3458(21–30).1  | MT34583(2–6).1   |

(continued on next page)

(Table S1 continued)

|                  |                  |                 |                 |                 |
|------------------|------------------|-----------------|-----------------|-----------------|
| MT345838.1       | MT34584(0-4).1   | MT3458(46-62).1 | MT3458(65-88).1 | MT3502(36-57).1 |
| MT3502(63-80).1  | MT350282.1       | MT35840(1,2).1  | MT3586(37-75).1 | MT3586(77-85).1 |
| MT358(687-703).1 | MT3587(05-26).1  | MT3587(28-48).1 | MT35986(5,6).1  | MT3650(25-33).1 |
| MT370516.1       | MT370518.1       | MT370831.1      | MT37083(3-9).1  | MT37084(1-6).1  |
| MT3708(48-54).1  | MT3708(56-66).1  | MT3708(68-72).1 | MT37087(4-8).1  | MT37088(0-3).1  |
| MT37088(5,6).1   | MT3708(88-92).1  | MT37089(4-9).1  | MT37090(1-9).1  | MT37091(1-7).1  |
| MT3709(19,20).1  | MT370925.1       | MT370927.1      | MT37093(0-5).1  | MT370937.1      |
| MT3709(39,40).1  | MT370942.1       | MT370944.1      | MT3709(46-50).1 | MT37095(2-4).1  |
| MT37095(6-8).1   | MT37096(0-2).1   | MT37096(4-7).1  | MT37097(0-2).1  | MT37097(5-7).1  |
| MT3709(79-81).1  | MT37098(4-8).1   | MT370991.1      | MT37099(3,4).1  | MT37099(6-8).1  |
| MT37100(0-2).1   | MT37100(6-9).1   | MT37101(2,3).1  | MT37101(5-9).1  | MT37102(2,3).1  |
| MT37102(6-9).1   | MT37103(2-6).1   | MT371038.1      | MT3710(47-50).1 | MT3715(68-74).1 |
| MT37248(0-2).1   | MT3741(01-16).1  | MT3754(28-38).1 | MT3754(40-63).1 | MT3754(65-72).1 |
| MT375474.1       | MT37547(6-8).1   | MT37548(0-3).1  | MT3807(28-34).1 | MT3854(14-79).1 |
| MT385482.1       | MT385485.1       | MT3945(28-31).1 | MT396241.1      | MT396266.1      |
| MT4076(49-59).1  | MT412134.1       | MT412155.1      | MT412170.1      | MT412173.1      |
| MT41217(6-8).1   | MT4122(26-30).1  | MT4122(33-59).1 | MT41226(1-4).1  | MT41226(7-9).1  |
| MT4122(71-81).1  | MT412(283-314).1 | MT41231(6-9).1  | MT4123(21-34).1 | MT41233(6,7).1  |
| MT41532(0-3).1   | MT415(894-912).1 | MT41672(5,6).2  | MT4188(80-92).1 | MT419810.1      |
| MT419812.1       | MT41981(4-6).1   | MT419818.1      | MT419820.1      | MT4198(29-32).1 |
| MT41983(4-7).1   | MT419839.1       | MT41984(1,2).1  | MT41984(6,7).1  | MT419851.1      |
| MT41985(3,4).1   | MT419860.1       | MT42280(6,7).1  | MT42855(1-4).1  | MT4291(83-91).1 |
| MT432195.1       | MT434(782-817).1 | MT4350(79-86).1 | MT4387(18-25).1 | MT4387(27-32).1 |
| MT4387(34-44).1  | MT4387(46-60).1  | MT43923(3,4).1  | MT439237.1      | MT439239.1      |
| MT439242.1       | MT43924(4,5).1   | MT439247.1      | MT4392(49-54).1 | MT439256.1      |
| MT439258.1       | MT43926(0-3).1   | MT439265.1      | MT43926(7,8).1  | MT43927(0,1).1  |
| MT439273.1       | MT4392(79,80).1  | MT43928(2-4).1  | MT4392(87-93).1 | MT43929(5-7).1  |
| MT439300.1       | MT43930(2,3).1   | MT439307.1      | MT43931(0-2).1  | MT43931(4-8).1  |

(continued on next page)

(Table S1 continued)

|                 |                 |                   |                 |                 |
|-----------------|-----------------|-------------------|-----------------|-----------------|
| MT444148.1      | MT444540.1      | MT444619.1        | MT44462(4–6).1  | MT444633.1      |
| MT444635.1      | MT446312.1      | MT446339.1        | MT4463(42–50).1 | MT44635(2–4).1  |
| MT44635(6–9).1  | MT44715(4–9).1  | MT44716(1–3).1    | MT44716(5,6).1  | MT447169.1      |
| MT44717(1–7).1  | MT44963(6,7).1  | MT449639.1        | MT449641.1      | MT449644.1      |
| MT449647.1      | MT449651.1      | MT449656.1        | MT44966(4,5).1  | MT449670.1      |
| MT44967(2,3).1  | MT4508(72–87).1 | MT450(889–907).1  | MT4509(09–15).1 | MT45091(7,8).1  |
| MT450932.1      | MT45093(5,6).1  | MT450938.1        | MT45094(1–4).1  | MT450946.1      |
| MT4509(48–51).1 | MT45095(4–7).1  | MT45096(0–3).1    | MT45096(5,6).1  | MT4509(68–74).1 |
| MT450977.1      | MT45098(0–5).1  | MT45(0988–1000).1 | MT451002.1      | MT45100(4–9).1  |
| MT451013.1      | MT451015.1      | MT4510(17–22).1   | MT451024.1      | MT451026.1      |
| MT451033.1      | MT4510(35–42).1 | MT45104(4–9).1    | MT45105(1,2).1  | MT4510(56–62).1 |
| MT45106(5,6).1  | MT451072.1      | MT451074.1        | MT45107(6,7).1  | MT451079.1      |
| MT451081.1      | MT45108(6–8).1  | MT451090.1        | MT45109(2–4).1  | MT451098.1      |
| MT45110(0–5).1  | MT45110(8,9).1  | MT45111(4–9).1    | MT4511(21–92).1 | MT45119(4–9).1  |
| MT45120(1–4).1  | MT4512(07–20).1 | MT45122(4–7).1    | MT4512(29–33).1 | MT4512(35–42).1 |
| MT45124(4–8).1  | MT451253.1      | MT45125(5–9).1    | MT451261.1      | MT45126(3–5).1  |
| MT451269.1      | MT451272.1      | MT451274.1        | MT451276.1      | MT45127(8,9).1  |
| MT451281.1      | MT45128(3,4).1  | MT451324.1        | MT45135(4–6).1  | MT451358.1      |
| MT451366.1      | MT451371.1      | MT45137(5,6).1    | MT451386.1      | MT451389.1      |
| MT45139(1,2).1  | MT45141(0–2).1  | MT451415.1        | MT451434.1      | MT451436.1      |
| MT451439.1      | MT45144(1,2).1  | MT45144(7–9).1    | MT451452.1      | MT451456.1      |
| MT451464.1      | MT451466.1      | MT451470.1        | MT451476.1      | MT451478.1      |
| MT451488.1      | MT451496.1      | MT451549.1        | MT451569.1      | MT451578.1      |
| MT45158(0–2).1  | MT451584.1      | MT451586.1        | MT451590.1      | MT451592.1      |
| MT451597.1      | MT451599.1      | MT45160(1–4).1    | MT45160(7–9).1  | MT451611.1      |
| MT451614.1      | MT451616.1      | MT451641.1        | MT451646.1      | MT451651.1      |
| MT451653.1      | MT451655.1      | MT451657.1        | MT45166(6–8).1  | MT45167(4,5).1  |
| MT451680.1      | MT451684.1      | MT451692.1        | MT451694.1      | MT451696.1      |

(continued on next page)

(Table S1 continued)

|                  |                  |                  |                  |                  |
|------------------|------------------|------------------|------------------|------------------|
| MT451704.1       | MT451708.1       | MT45171(0–3).1   | MT451716.1       | MT451718.1       |
| MT451723.1       | MT451726.1       | MT451728.1       | MT451730.1       | MT45173(3,4).1   |
| MT45173(6,7).1   | MT451740.1       | MT451742.1       | MT45174(8,9).1   | MT451751.1       |
| MT45175(4,5).1   | MT451762.1       | MT451771.1       | MT45177(5–7).1   | MT451779.1       |
| MT451783.1       | MT451786.1       | MT451874.1       | MT45187(6–8).1   | MT4518(80–90).1  |
| MT45257(4–6).1   | MT457(390–403).1 | MT459(832–917).1 | MT4599(19–25).1  | MT459979.1       |
| MT4599(85–90).1  | MT4600(89–92).1  | MT46011(3–7).1   | MT4601(19–21).1  | MT46012(4,5).1   |
| MT4601(27–30).1  | MT46013(2,3).1   | MT4601(35–40).1  | MT4616(03–60).1  | MT46166(2–4).1   |
| MT46166(6–8).1   | MT466071.1       | MT466583.1       | MT4672(37–63).1  | MT4701(00–79).1  |
| MT470219.1       | MT47262(1–7).1   | MT4741(26–30).1  | MT47413(2–8).1   | MT47638(4,5).1   |
| MT4778(35–62).1  | MT477885.1       | MT47790(3,4).1   | MT479216.1       | MT47922(3–7).1   |
| MT481(895–909).1 | MT4819(27–36).1  | MT481992.1       | MT48211(0,1).1   | MT48211(3–9).1   |
| MT4821(21–49).1  | MT4835(53–60).1  | MT483563.1       | MT483702.1       | MT483867.1       |
| MT4838(74–81).1  | MT49697(2–7).1   | MT4969(79–97).1  | MT499(171–210).1 | MT499215.1       |
| MT4992(17–20).1  | MT500122.1       | MT502774.1       | MT506201.1       | MT506203.1       |
| MT506205.1       | MT506209.1       | MT506221.1       | MT50653(0–5).1   | MT506537.1       |
| MT5065(39–41).1  | MT506544.1       | MT506546.1       | MT50656(5–8).1   | MT50657(0–3).1   |
| MT506581.1       | MT50664(2,3).1   | MT5066(48–52).1  | MT506654.1       | MT5066(58–60).1  |
| MT50666(3,4).1   | MT506666.1       | MT506668.1       | MT506670.1       | MT50667(4,5).1   |
| MT506677.1       | MT5066(79–81).1  | MT506683.1       | MT506685.1       | MT506687.1       |
| MT5066(89,90).1  | MT50669(3–7).1   | MT50670(0,1).1   | MT506707.1       | MT506(885–907).1 |
| MT506981.1       | MT507018.1       | MT507032.2       | MT5072(71–82).1  | MT50779(3–6).1   |
| MT5094(52–68).1  | MT50947(1,2).1   | MT50947(4,5).1   | MT509477.1       | MT509480.1       |
| MT509486.1       | MT509(488–512).1 | MT5096(49–51).1  | MT50965(6–9).1   | MT509669.1       |
| MT509674.1       | MT509683.1       | MT509685.1       | MT50970(2,3).1   | MT50995(8,9).1   |
| MT510(690–703).1 | MT51071(8,9).1   | MT51072(1,2).1   | MT51072(5–8).1   | MT510999.1       |
| MT511059.1       | MT5110(65–84).1  | MT5124(15–31).1  | MT5124(33–47).1  | MT51264(4,5).1   |
| MT513758.1       | MT5174(20–34).1  | MT51743(6,7).1   | MT517443.1       | MT52017(2–4).1   |

(continued on next page)



(Table S1 continued)

|                  |                  |                  |                  |                 |
|------------------|------------------|------------------|------------------|-----------------|
| MT52017(6–8).1   | MT52018(0–9).1   | MT520(191–201).1 | MT5202(03–10).1  | MT5202(12–25).1 |
| MT5202(28–40).1  | MT5202(43–66).1  | MT5202(69–73).1  | MT5202(76–81).1  | MT52028(3–5).1  |
| MT5202(87–92).1  | MT52029(5,6).1   | MT520(298–302).1 | MT5203(04–10).1  | MT5203(12–21).1 |
| MT52032(3–5).1   | MT5203(27–33).1  | MT5203(36–53).1  | MT5203(55–77).1  | MT5203(79–92).1 |
| MT520394.1       | MT520(396–424).1 | MT52042(6–9).1   | MT52043(1–7).1   | MT5204(39–41).1 |
| MT52044(3–8).1   | MT52045(1–5).1   | MT5204(57–61).1  | MT52046(3–7).1   | MT520469.1      |
| MT52047(1–5).1   | MT52047(7–9).1   | MT5204(81–90).1  | MT52049(2–8).1   | MT5205(00–12).1 |
| MT5205(15–23).1  | MT52052(5,6).1   | MT5205(28–30).1  | MT5205(32–44).1  | MT52054(6,7).1  |
| MT52285(2–5).1   | MT525950.1       | MT527178.1       | MT527184.1       | MT528235.1      |
| MT52823(7–9).1   | MT528(598–631).1 | MT531537.2       | MT53243(5–8).1   | MT532557.1      |
| MT533(197–206).1 | MT533208.1       | MT533210.1       | MT533212.1       | MT533215.1      |
| MT53321(7–9).1   | MT53322(1–3).1   | MT5332(25–30).1  | MT53323(2–8).1   | MT534285.1      |
| MT53430(4–9).1   | MT53431(1–8).1   | MT534320.1       | MT5343(22–39).1  | MT534630.1      |
| MT535472.1       | MT535481.1       | MT5354(86–97).1  | MT535(499–503).1 | MT535505.1      |
| MT53550(8,9).1   | MT5361(76–90).1  | MT536956.1       | MT53696(1,2).1   | MT53696(4,5).1  |
| MT53697(0–2).1   | MT53697(4–7).1   | MT5391(58–60).1  | MT5391(62–76).1  | MT539726.1      |
| MT539729.1       | MT547814.1       | MT55160(4–9).1   | MT554052.1       | MT5575(68–70).1 |
| MT558(647–707).1 | MT55903(7,8).1   | MT55980(0–3).1   | MT560525.1       | MT56053(0,1).1  |
| MT56065(6,7).1   | MT5606(67–75).1  | MT560677.1       | MT5606(79,80).1  | MT560682.1      |
| MT5606(89,90).1  | MT56069(2–4).1   | MT56070(4–6).1   | MT560827.1       | MT56549(5–9).1  |
| MT56643(5–7).1   | MT5686(34–41).1  | MT568645.1       | MT56947(0–4).1   | MT5760(25–35).1 |
| MT5760(37–49).1  | MT5760(52–61).1  | MT5765(29–32).1  | MT576584.1       | MT5766(39–45).1 |
| MT576689.1       | MT5770(09–15).1  | MT577359.1       | MT577627.1       | MT57801(5–7).1  |
| MT58245(3,4).1   | MT582456.1       | MT5824(58–63).1  | MT58246(5–9).1   | MT5824(71–88).1 |
| MT582491.1       | MT582494.1       | MT582496.1       | MT58249(8,9).1   | MT584985.1      |
| MT58499(7,8).1   | MT585003.1       | MT58501(0,1).1   | MT585014.1       | MT585019.1      |
| MT585027.1       | MT585032.1       | MT585036.1       | MT585039.1       | MT585042.1      |
| MT58504(4,5).1   | MT585048.1       | MT585050.1       | MT585052.1       | MT5850(58–61).1 |

(continued on next page)

(Table S1 continued)

|                   |                  |                 |                  |                  |
|-------------------|------------------|-----------------|------------------|------------------|
| MT585064.1        | MT58506(6,7).1   | MT585071.1      | MT585077.1       | MT585(082–104).1 |
| MT590(598–600).1  | MT594109.1       | MT594112.1      | MT59440(1,2).1   | MT59817(1–8).1   |
| MT59863(3,4).1    | MT598636.1       | MT5986(39–42).1 | MT6012(75–95).1  | MT60581(5–8).1   |
| MT6072(44–55).1   | MT6076(01–21).1  | MT608648.1      | MT609(558–600).1 | MT609918.1       |
| MT610913.1        | MT61144(0–4).1   | MT6114(48–51).1 | MT611527.1       | MT611530.1       |
| MT61153(6–9).1    | MT611968.1       | MT61434(7–9).1  | MT61435(6,7).1   | MT614447.1       |
| MT6144(49,50).1   | MT614(452–510).1 | MT61451(2–7).1  | MT6145(19–61).1  | MT614563.1       |
| MT614(595–601).1  | MT62076(6,7).1   | MT6207(69–72).1 | MT621560.1       | MT622319.1       |
| MT622321.1        | MT624728.1       | MT624733.1      | MT627213.1       | MT62721(6,7).1   |
| MT627219.1        | MT627221.1       | MT627223.1      | MT62722(5–9).1   | MT62723(1–8).1   |
| MT627(240–300).1  | MT6273(02–12).1  | MT62731(4–8).1  | MT627325.1       | MT6273(89–96).1  |
| MT6274(04–37).1   | MT627607.1       | MT627609.1      | MT62761(2–6).1   | MT6276(18–38).1  |
| MT6277(45–52).1   | MT6277(54–67).1  | MT6279(20–32).1 | MT6280(37–71).1  | MT6280(73–82).1  |
| MT62808(4,5).1    | MT6280(87–93).1  | MT628095.1      | MT62809(7,8).1   | MT62810(0–2).1   |
| MT62810(4,5).1    | MT628110.1       | MT628113.1      | MT628116.1       | MT62811(8,9).1   |
| MT628121.1        | MT6281(23–43).1  | MT6281(45–50).1 | MT62815(2–8).1   | MT628160.1       |
| MT62816(3–7).1    | MT6281(69–78).1  | MT62818(0,1).1  | MT628184.1       | MT62818(6,7).1   |
| MT628(190–225).1  | MT62822(7,8).1   | MT62823(0–4).1  | MT628236.1       | MT628238.1       |
| MT6282(41–76).1   | MT6282(79,80).1  | MT6304(21–32).1 | MT6317(84–95).1  | MT631797.1       |
| MT631(799,800).1  | MT63180(2,3).1   | MT631805.1      | MT63180(7–9).1   | MT631813.1       |
| MT6318(15–25).1   | MT6318(27–31).1  | MT631833.1      | MT6318(37–42).1  | MT632491.1       |
| MT632(493–529).1  | MT6325(31–67).1  | MT6325(69–86).1 | MT6325(88–91).1  | MT632(593–616).1 |
| MT6326(18–27).1   | MT6326(29–32).1  | MT632766.1      | MT6327(69–73).1  | MT632(775–808).1 |
| MT6328(10–61).1   | MT6328(63–72).1  | MT6328(74–90).1 | MT63289(2–8).1   | MT6329(00–14).1  |
| MT63(2916–3011).1 | MT6330(13–39).1  | MT633041.1      | MT63304(4–6).1   | MT635255.1       |
| MT6352(69–72).1   | MT635328.1       | MT635339.1      | MT63539(1–3).1   | MT635397.1       |
| MT6354(03–10).1   | MT635445.1       | MT635641.1      | MT635643.1       | MT6356(45–55).1  |
| MT635672.1        | MT63585(5–8).1   | MT637143.1      | MT64148(5,6).1   | MT6414(88–90).1  |

(continued on next page)

(Table S1 continued)

|                  |                  |                 |                  |                 |
|------------------|------------------|-----------------|------------------|-----------------|
| MT641(492–506).1 | MT6415(08–30).1  | MT6415(32–96).1 | MT641(598–615).1 | MT6416(17–36).1 |
| MT6416(39–46).1  | MT641648.1       | MT641651.1      | MT641656.1       | MT64166(1–7).1  |
| MT641669.1       | MT641674.1       | MT64167(6–9).1  | MT64168(1,2).1   | MT641686.1      |
| MT641689.1       | MT64169(2,3).1   | MT641697.1      | MT641699.1       | MT641708.1      |
| MT641710.1       | MT64172(0–4).1   | MT6417(28–31).1 | MT641733.1       | MT6417(35–46).1 |
| MT641748.1       | MT64175(0–4).1   | MT6417(57–64).1 | MT64176(6–8).1   | MT641774.1      |
| MT64177(6–8).1   | MT64206(8,9).1   | MT64207(2–4).1  | MT6420(78–83).1  | MT64208(5–9).1  |
| MT642(091–107).1 | MT642109.1       | MT6421(11–34).1 | MT642(136–207).1 | MT6422(09–35).1 |
| MT6422(38–73).1  | MT642(275–334).1 | MT6423(36–53).1 | MT6423(55–67).1  | MT6423(69–75).1 |
| MT6423(77–85).1  | MT642(387–435).1 | MT644268.1      | MT64605(3,4).1   | MT64606(4,5).1  |
| MT6460(68–84).1  | MT6460(86–94).1  | MT64609(6–8).1  | MT646101.1       | MT646106.1      |
| MT646112.1       | MT64611(6,7).1   | MT646120.1      | MT648676.1       | MT648830.1      |
| MT653094.1       | MT653097.1       | MT653099.1      | MT65513(1–5).1   | MT65574(2–6).1  |
| MT65575(0,1).1   | MT655948.1       | MT65601(0,1).1  | MT65625(6,7).1   | MT65659(0,1).1  |
| MT657271.1       | MT657275.1       | MT657958.1      | MT658264.1       | MT65850(0–5).1  |
| MT65850(7–9).1   | MT661524.1       | MT66410(5–7).1  | MT664109.1       | MT66411(7,8).1  |
| MT664143.1       | MT664161.1       | MT6641(69–72).1 | MT664175.1       | MT664197.1      |
| MT66420(1–3).1   | MT664205.1       | MT664209.1      | MT664727.1       | MT664729.1      |
| MT664774.1       | MT664793.1       | MT66479(5,6).1  | MT66480(7,8).1   | MT664822.1      |
| MT664986.1       | MT664990.1       | MT665006.1      | MT665028.1       | MT665970.1      |
| MT665972.1       | MT665974.1       | MT666042.1      | MT666068.1       | MT666099.1      |
| MT667351.1       | MT668716.1       | MT66932(1,2).1  | MT670008.1       | MT67001(3–5).1  |
| MT67001(7–9).1   | MT67002(1–3).1   | MT6718(10–28).1 | MT675289.1       | MT675517.1      |
| MT675933.1       | MT6759(37–45).1  | MT67595(0–2).1  | MT67595(4–9).1   | MT67601(3,4).1  |
| MT6762(88–91).1  | MT67636(6–9).1   | MT6763(88–90).1 | MT676397.1       | MT678839.1      |
| MT6791(55–96).1  | MT679198.1       | MT67920(1,2).1  | MT67920(5,6).1   | MT679208.1      |
| MT6802(17–42).1  | MT682732.1       | MT6833(86–95).1 | MT683397.1       | MT683399.1      |
| MT68340(3,4).1   | MT6834(06–13).1  | MT68341(6–8).1  | MT703677.1       | MT70388(3,4).1  |

(continued on next page)

(Table S1 continued)

|                 |                   |                  |                  |                  |
|-----------------|-------------------|------------------|------------------|------------------|
| MT703958.1      | MT703963.1        | MT703969.1       | MT703973.1       | MT70397(5–9).1   |
| MT70398(2–5).1  | MT70(3989–4001).1 | MT70400(3–9).1   | MT70401(1,2).1   | MT704014.1       |
| MT70401(7–9).1  | MT70402(2–6).1    | MT7040(29,30).1  | MT704033.1       | MT7040(37–47).1  |
| MT7040(49–52).1 | MT70405(5,6).1    | MT70406(0,1).1   | MT7040(63–75).1  | MT704077.1       |
| MT70408(0,1).1  | MT70408(4,5).1    | MT704088.1       | MT70409(4,5).1   | MT70410(0–2).1   |
| MT70411(1,2).1  | MT70411(4–7).1    | MT7041(19–29).1  | MT70413(1–6).1   | MT70431(0–7).1   |
| MT704812.1      | MT7048(16–25).1   | MT70520(5,6).1   | MT706050.1       | MT70613(2–8).1   |
| MT70614(0–6).1  | MT706(148–208).1  | MT706210.1       | MT70621(2–6).1   | MT7062(18–41).1  |
| MT7062(43–56).1 | MT7062(58–60).1   | MT70626(2–6).1   | MT7062(68–73).1  | MT70627(5–7).1   |
| MT7062(79–82).1 | MT706(284–315).1  | MT7063(17–76).1  | MT7063(79–87).1  | MT706(389–444).1 |
| MT7064(46–51).1 | MT706453.1        | MT70910(4,5).1   | MT710714.1       | MT71187(2,3).1   |
| MT711880.1      | MT712859.1        | MT712861.1       | MT712863.1       | MT730002.1       |
| MT731285.1      | MT731292.1        | MT731327.1       | MT731346.1       | MT731468.1       |
| MT7316(53–69).1 | MT731673.1        | MT7317(33–44).1  | MT731746.1       | MT731764.1       |
| MT73193(1–8).1  | MT733120.1        | MT734046.1       | MT734055.1       | MT738101.1       |
| MT738173.1      | MT7394(25–43).1   | MT739444.2       | MT73944(5,6).1   | MT7394(48–58).1  |
| MT7394(60–77).1 | MT74038(1–4).1    | MT74039(0–7).1   | MT74040(1–4).1   | MT74043(1,2).1   |
| MT74043(4–6).1  | MT7404(38–41).1   | MT740444.1       | MT7404(76–80).1  | MT740483.1       |
| MT740485.1      | MT74061(7–9).1    | MT740684.1       | MT740686.1       | MT740688.1       |
| MT740706.1      | MT740708.1        | MT740717.1       | MT74072(3,4).1   | MT740820.1       |
| MT740896.1      | MT740923.1        | MT741096.1       | MT741490.1       | MT7420(87–92).1  |
| MT74278(2–4).1  | MT745584.1        | MT745601.1       | MT745605.1       | MT745608.1       |
| MT74561(0,1).1  | MT7456(29–31).1   | MT7456(39,40).1  | MT745642.1       | MT74564(4–6).1   |
| MT7456(48–74).1 | MT745(676–749).1  | MT745767.1       | MT745836.1       | MT745875.1       |
| MT747438.1      | MT747978.1        | MT748758.1       | MT7500(20–67).1  | MT7500(69–75).1  |
| MT7500(78–81).1 | MT75008(3,4).1    | MT750(087–116).1 | MT75012(1,2).1   | MT750124.1       |
| MT75013(1,2).1  | MT75013(5,6).1    | MT750139.1       | MT75014(2–5).1   | MT75014(8,9).1   |
| MT7501(51–82).1 | MT7501(86–92).1   | MT75019(4,5).1   | MT750(197–201).1 | MT7503(33–44).1  |

(continued on next page)

(Table S1 continued)

|                  |                 |                 |                  |                  |
|------------------|-----------------|-----------------|------------------|------------------|
| MT75034(6–8).1   | MT75035(0–9).1  | MT7503(61–74).1 | MT7503(77–81).1  | MT75038(3–7).1   |
| MT7503(89,90).1  | MT75039(3–7).1  | MT75040(1,2).1  | MT7504(04–27).1  | MT7504(29–34).1  |
| MT75043(6,7).1   | MT7504(39–44).1 | MT75044(6–8).1  | MT75045(0–3).1   | MT7504(55–60).1  |
| MT7504(62–88).1  | MT75049(0–3).1  | MT750495.1      | MT75049(7,8).1   | MT75050(0–7).1   |
| MT7505(09,10).1  | MT755582.1      | MT755585.1      | MT755587.1       | MT75559(3,4).1   |
| MT755(599,600).1 | MT755602.1      | MT7558(27–38).1 | MT75585(7,8).1   | MT755(883–901).1 |
| MT75591(6,7).1   | MT75595(5,6).1  | MT755973.1      | MT757006.1       | MT75701(2,3).1   |
| MT757016.1       | MT7570(18–22).1 | MT75702(4,5).1  | MT757027.1       | MT7570(29,30).1  |
| MT75703(2,3).1   | MT7570(37–41).1 | MT75704(3,4).1  | MT757047.1       | MT757049.1       |
| MT757051.1       | MT757054.1      | MT757056.1      | MT757058.1       | MT75706(3,4).1   |
| MT75706(6–8).1   | MT7570(70–83).1 | MT757085.1      | MT757087.1       | MT757094.1       |
| MT757096.1       | MT757100.1      | MT75710(4,5).1  | MT75711(0,1).1   | MT75711(5–7).1   |
| MT757119.1       | MT75712(1–3).1  | MT758193.1      | MT758197.1       | MT75820(2,3).1   |
| MT758213.1       | MT758215.1      | MT758240.1      | MT758314.1       | MT758346.1       |
| MT758375.1       | MT758402.1      | MT758421.1      | MT758436.1       | MT758439.1       |
| MT758471.1       | MT758683.1      | MT758701.1      | MT759582.1       | MT759588.1       |
| MT759714.1       | MT759742.1      | MT759820.1      | MT759844.1       | MT760790.1       |
| MT76239(6–8).1   | MT76294(2–4).1  | MT764166.1      | MT764170.1       | MT764172.1       |
| MT764174.1       | MT7641(77–81).1 | MT76690(7,8).1  | MT7720(85–91).1  | MT772210.1       |
| MT772215.1       | MT772237.1      | MT772240.1      | MT77225(2,3).1   | MT772256.1       |
| MT772271.1       | MT77229(3,4).1  | MT772297.1      | MT77240(3–5).1   | MT7724(07–12).1  |
| MT77241(6–9).1   | MT77242(1–3).1  | MT77242(5–8).1  | MT772430.1       | MT77243(2–8).1   |
| MT77244(0,1).1   | MT77244(3–5).1  | MT7724(47–50).1 | MT77245(2–5).1   | MT7724(57–67).1  |
| MT772469.1       | MT77247(1–7).1  | MT7724(79–91).1 | MT772(494–507).1 | MT7725(09,10).1  |
| MT772512.1       | MT77251(4–6).1  | MT7725(18–29).1 | MT77253(1–9).1   | MT772541.1       |
| MT7725(43–59).1  | MT7725(61–71).1 | MT77257(3–5).1  | MT7725(77–80).1  | MT77313(3,4).1   |
| MT7758(26–33).1  | MT7764(01–27).1 | MT776904.1      | MT777677.1       | MT77882(7–9).1   |
| MT78141(4,5).1   | MT782348.1      | MT782361.1      | MT782364.1       | MT7823(69–71).1  |

(continued on next page)

(Table S1 continued)

|                  |                   |                 |                 |                  |
|------------------|-------------------|-----------------|-----------------|------------------|
| MT78237(7,8).1   | MT78238(1,2).1    | MT786327.1      | MT786329.1      | MT786331.1       |
| MT78633(4-7).1   | MT786422.1        | MT786438.1      | MT786442.1      | MT786444.1       |
| MT786455.1       | MT786(798-802).1  | MT786804.1      | MT7868(09-15).1 | MT7868(17-40).1  |
| MT786842.1       | MT7868(44-51).1   | MT786859.1      | MT786865.1      | MT786868.1       |
| MT786941.1       | MT786943.1        | MT786946.1      | MT787473.1      | MT787486.1       |
| MT787500.1       | MT787503.1        | MT787553.1      | MT787564.1      | MT787577.1       |
| MT78764(6-8).1   | MT787650.1        | MT787742.1      | MT78774(5,6).1  | MT787749.1       |
| MT789688.1       | MT789690.1        | MT789712.1      | MT790522.1      | MT791312.1       |
| MT79184(4,5).1   | MT79185(0-2).1    | MT79185(4,5).1  | MT79185(7,8).1  | MT79186(1,2).1   |
| MT791864.1       | MT7918(68-70).1   | MT791878.1      | MT791880.1      | MT791883.1       |
| MT791885.1       | MT791891.1        | MT79189(5,6).1  | MT791899.1      | MT791907.1       |
| MT79191(4,5).1   | MT791920.1        | MT791923.1      | MT791926.1      | MT7919(36-50).1  |
| MT7919(53-63).1  | MT79587(0-6).1    | MT7958(78-84).1 | MT7958(87-96).1 | MT795(898-902).1 |
| MT79590(4-7).1   | MT7959(09-13).1   | MT7977(58-62).1 | MT79776(4,5).1  | MT79776(8,9).1   |
| MT79777(1,2).1   | MT798592.1        | MT799967.1      | MT7999(69,70).1 | MT799972.1       |
| MT799974.1       | MT799976.1        | MT799991.1      | MT799998.1      | MT800002.1       |
| MT800005.1       | MT800010.1        | MT80001(3-6).1  | MT800021.1      | MT80002(3,4).1   |
| MT8000(29-31).1  | MT80003(5-7).1    | MT800041.1      | MT800043.1      | MT800045.1       |
| MT800047.1       | MT800050.1        | MT800105.1      | MT800282.1      | MT800284.1       |
| MT800505.1       | MT800515.1        | MT800542.1      | MT800753.1      | MT800758.1       |
| MT800794.1       | MT800816.1        | MT800818.1      | MT800820.1      | MT800845.1       |
| MT800873.1       | MT80089(5,6).1    | MT80092(3-5).1  | MT800928.1      | MT800934.1       |
| MT800936.1       | MT8009(39,40).1   | MT800942.1      | MT80097(7,8).1  | MT80099(4,5).1   |
| MT800997.1       | MT80(0999-1004).1 | MT801006.1      | MT801043.1      | MT801048.1       |
| MT801051.1       | MT806104.1        | MT806176.1      | MT80619(1,2).1  | MT8067(56-83).1  |
| MT806(785-809).1 | MT806884.1        | MT807936.1      | MT808071.1      | MT810084.1       |
| MT81008(6-9).1   | MT8104(77-81).1   | MT810483.1      | MT81048(5-9).1  | MT810(491-514).1 |
| MT810516.1       | MT81051(8,9).1    | MT8105(21-42).1 | MT8105(44-68).1 | MT81057(0-5).1   |

(continued on next page)

(Table S1 continued)

|                 |                  |                 |                  |                  |
|-----------------|------------------|-----------------|------------------|------------------|
| MT8105(77–82).1 | MT810(584–621).1 | MT8106(23–52).1 | MT81065(4,5).1   | MT8106(57–73).1  |
| MT8106(75–88).1 | MT81069(0,1).1   | MT81069(3–5).1  | MT810(697–710).1 | MT81071(2–4).1   |
| MT8107(16–25).1 | MT81072(7,8).1   | MT81073(0,1).1  | MT810758.1       | MT810761.1       |
| MT81076(4–9).1  | MT81077(1–6).1   | MT8107(78–84).1 | MT81078(6–9).1   | MT81081(4–6).1   |
| MT810819.1      | MT8108(21–33).1  | MT81083(5–9).1  | MT81084(1–3).1   | MT81084(6–8).1   |
| MT81085(0–2).1  | MT81085(5–9).1   | MT810861.1      | MT810863.1       | MT81086(5–7).1   |
| MT8108(69,70).1 | MT81087(2–7).1   | MT810879.1      | MT81088(1–6).1   | MT810(888–903).1 |
| MT8109(05–11).1 | MT810913.1       | MT81091(5–7).1  | MT8109(19,20).1  | MT810922.1       |
| MT810924.1      | MT8109(26–30).1  | MT81093(2,3).1  | MT810936.1       | MT81094(1–3).1   |
| MT81094(6,7).1  | MT8109(49–53).1  | MT810955.1      | MT81095(7,8).1   | MT81096(1–4).1   |
| MT81096(6,7).1  | MT810969.1       | MT81097(1–3).1  | MT8109(75–98).1  | MT81100(0–3).1   |
| MT81100(6–8).1  | MT8110(10–22).1  | MT811162.1      | MT81116(4–6).1   | MT811169.1       |
| MT811171.1      | MT811173.1       | MT81117(5–7).1  | MT8111(79–88).1  | MT81119(0,1).1   |
| MT811194.1      | MT811(196–210).1 | MT811212.1      | MT8112(15–22).1  | MT811224.1       |
| MT8112(26–31).1 | MT81123(3–8).1   | MT81124(0–2).1  | MT8112(44–59).1  | MT8112(61–72).1  |
| MT8112(74–83).1 | MT811286.1       | MT8112(88–90).1 | MT811292.1       | MT811(294–318).1 |
| MT81132(0–6).1  | MT8113(28–41).1  | MT8113(43–69).1 | MT81137(1,2).1   | MT81137(4,5).1   |
| MT811378.1      | MT811380.1       | MT8113(82–90).1 | MT81139(2–5).1   | MT811(397–401).1 |
| MT8114(03–14).1 | MT811416.1       | MT81142(0–4).1  | MT811426.1       | MT8114(28–30).1  |
| MT8114(32–43).1 | MT81144(5–8).1   | MT811451.1      | MT81145(3,4).1   | MT811456.1       |
| MT8114(58–61).1 | MT811(463–523).1 | MT8115(25–35).1 | MT81154(4–6).1   | MT8115(48–58).1  |
| MT81156(0–2).1  | MT81156(4–9).1   | MT811639.1      | MT811641.1       | MT811649.1       |
| MT81165(4,5).1  | MT8116(57–60).1  | MT811662.1      | MT811664.1       | MT811667.1       |
| MT8116(69–73).1 | MT8116(75–83).1  | MT81168(8,9).1  | MT811693.1       | MT811(695–703).1 |
| MT8117(05–16).1 | MT8117(18–29).1  | MT81173(1,2).1  | MT811734.1       | MT81173(7,8).1   |
| MT81174(0,1).1  | MT81174(3–5).1   | MT81174(7–9).1  | MT81175(1–3).1   | MT811755.1       |
| MT811758.1      | MT814636.1       | MT814698.1      | MT8201(27–32).1  | MT8204(61–84).1  |
| MT82048(6–9).1  | MT8215(30–43).1  | MT8215(45–75).1 | MT8215(77–82).1  | MT821(584–632).1 |

(continued on next page)

(Table S1 continued)

|                  |                   |                  |                  |                  |
|------------------|-------------------|------------------|------------------|------------------|
| MT8216(34–48).1  | MT821650.1        | MT82165(2–6).1   | MT8216(58–66).1  | MT8216(68–71).1  |
| MT82167(3,4).1   | MT8216(76–96).1   | MT821(698–705).1 | MT821707.1       | MT8217(09–11).1  |
| MT82171(3–8).1   | MT8217(20–35).1   | MT8217(37–50).1  | MT82175(2–6).1   | MT8217(58–78).1  |
| MT8217(80–93).1  | MT821795.1        | MT825091.1       | MT82707(4,5).1   | MT827190.1       |
| MT82720(2,3).1   | MT8272(06–53).1   | MT8278(09–13).1  | MT8278(15–29).1  | MT82783(1–7).1   |
| MT8278(39–43).1  | MT827845.1        | MT827872.1       | MT827940.1       | MT83112(2–5).1   |
| MT8311(27–31).1  | MT83113(3–5).1    | MT8311(37–45).1  | MT8311(47–54).1  | MT8311(56–84).1  |
| MT831(186–202).1 | MT8312(04–27).1   | MT8312(29–41).1  | MT83124(3–6).1   | MT831(248–316).1 |
| MT8313(18–82).1  | MT83138(5–7).1    | MT831(389–429).1 | MT8314(31–65).1  | MT8314(67–80).1  |
| MT83148(2–6).1   | MT8315(31–50).1   | MT83155(2–9).1   | MT8315(61–91).1  | MT83159(3–9).1   |
| MT8316(01–21).1  | MT83162(3–7).1    | MT8316(29–46).1  | MT8316(48–50).1  | MT831(652–711).1 |
| MT83171(3,4).1   | MT8317(16–57).1   | MT8317(60–96).1  | MT831(798–800).1 | MT831802.1       |
| MT83180(4–9).1   | MT831811.1        | MT831813.1       | MT83181(5,6).1   | MT8318(18–30).1  |
| MT8318(32–48).1  | MT8318(50–63).1   | MT8318(65–70).1  | MT8318(72–81).1  | MT8318(83–92).1  |
| MT831(894–900).1 | MT833958.1        | MT83396(0–2).1   | MT83396(4–9).1   | MT833972.1       |
| MT8339(74–82).1  | MT83(3985–4017).1 | MT8340(19–50).1  | MT83405(2–5).1   | MT8340(57–62).1  |
| MT8340(64–80).1  | MT83408(2–4).1    | MT8340(86–97).1  | MT834(099–121).1 | MT8341(23–30).1  |
| MT83413(2–9).1   | MT83414(1–8).1    | MT8341(50–78).1  | MT8341(80–93).1  | MT83419(5–9).1   |
| MT834201.1       | MT83420(3,4).1    | MT8342(06–14).1  | MT8342(16–39).1  | MT83424(1–7).1   |
| MT8342(49–56).1  | MT8342(58–78).1   | MT83428(0–2).1   | MT8342(84–93).1  | MT834(295–313).1 |
| MT8343(15–31).1  | MT83433(5–9).1    | MT834341.1       | MT83434(3–5).1   | MT83434(7,8).1   |
| MT834350.1       | MT8343(52–60).1   | MT83460(7–9).1   | MT834611.1       | MT83461(3–7).1   |
| MT8346(19,20).1  | MT83462(2–6).1    | MT834628.1       | MT83463(0–2).1   | MT8346(34–49).1  |
| MT83465(1–3).1   | MT83465(6,7).1    | MT83466(0–2).1   | MT834664.1       | MT83466(7,8).1   |
| MT83467(1–6).1   | MT8346(78–82).1   | MT8346(84–97).1  | MT834699.1       | MT834715.1       |
| MT83473(0,1).1   | MT83473(3–5).1    | MT8348(49,50).1  | MT83502(6,7).1   | MT835383.1       |
| MT8432(85–95).1  | MT843(297–301).1  | MT84330(3–7).1   | MT8433(09–20).1  | MT8437(37–59).1  |
| MT8440(21–49).1  | MT84408(8,9).1    | MT84587(7,8).1   | MT8460(04–15).1  | MT846413.1       |

(continued on next page)



(Table S1 continued)

|                  |                 |                  |                  |                  |
|------------------|-----------------|------------------|------------------|------------------|
| MT846415.1       | MT84641(7,8).1  | MT84642(0-3).1   | MT84642(5,6).1   | MT8464(28-36).1  |
| MT8464(38-40).1  | MT84644(2-6).1  | MT8464(49-52).1  | MT84645(4-7).1   | MT84646(0-5).1   |
| MT8464(67-71).1  | MT846473.1      | MT84647(5-8).1   | MT84648(0,1).1   | MT84648(3-6).1   |
| MT8464(88-92).1  | MT846494.1      | MT846(499-515).1 | MT8465(17-23).1  | MT84652(5-9).1   |
| MT846531.1       | MT84653(3-5).1  | MT8465(37-41).1  | MT846545.1       | MT846547.1       |
| MT8465(53-61).1  | MT84656(3-5).1  | MT8465(67-81).1  | MT8465(83-98).1  | MT8466(00-16).1  |
| MT8466(18-23).1  | MT84662(6-9).1  | MT8466(31-55).1  | MT8466(57-60).1  | MT8466(62-71).1  |
| MT84667(3-7).1   | MT846679.1      | MT84668(1,2).1   | MT846684.1       | MT84668(6,7).1   |
| MT8466(89-91).1  | MT8472(08-28).1 | MT85645(2-9).1   | MT8566(78-80).1  | MT8566(82-91).1  |
| MT87249(2-9).1   | MT87250(1,2).1  | MT87305(0-3).1   | MT8730(55-73).1  | MT87307(5,6).1   |
| MT873(078-100).1 | MT87310(2-5).1  | MT8731(08-21).1  | MT8731(23-37).1  | MT8731(39-41).1  |
| MT873143.1       | MT8731(45-54).1 | MT8731(56-61).1  | MT873163.1       | MT87316(5-9).1   |
| MT8731(72-85).1  | MT8731(87-92).1 | MT873(194-213).1 | MT87321(6-8).1   | MT87322(0-6).1   |
| MT873228.1       | MT87323(0,1).1  | MT873233.1       | MT8732(35-40).1  | MT87324(2-5).1   |
| MT873247.1       | MT8732(49-51).1 | MT87325(3-9).1   | MT8732(61-70).1  | MT87327(2-5).1   |
| MT8732(77-87).1  | MT8732(89,90).1 | MT87329(2-6).1   | MT873(298-309).1 | MT87331(1,2).1   |
| MT873314.1       | MT8733(16-21).1 | MT87332(3,4).1   | MT8733(26-40).1  | MT8733(42-53).1  |
| MT87335(5,6).1   | MT8733(59-70).1 | MT87337(2,3).1   | MT8733(75-85).1  | MT873387.1       |
| MT8733(89-93).1  | MT87339(5-9).1  | MT8734(01-14).1  | MT8734(16-22).1  | MT873424.1       |
| MT873426.1       | MT8734(28-31).1 | MT87343(3,4).1   | MT8734(36-48).1  | MT8734(50-73).1  |
| MT87347(5-7).1   | MT8734(79-82).1 | MT8734(84-91).1  | MT87349(3,4).1   | MT873(496-501).1 |
| MT87350(3-7).1   | MT8735(09,10).1 | MT873801.1       | MT873803.1       | MT873807.1       |
| MT873812.1       | MT873821.1      | MT873827.1       | MT873890.1       | MT873892.1       |
| MT873898.1       | MT873923.1      | MT8753(54-60).1  | MT87643(1-3).1   | MT87652(5-7).1   |
| MT87654(6-8).1   | MT87655(4-6).1  | MT87657(1,2).1   | MT87659(8,9).1   | MT87660(6,7).1   |
| MT877256.1       | MT877296.1      | MT877(298-300).1 | MT877302.1       | MT87730(4-6).1   |
| MT877309.1       | MT87731(5,6).1  | MT877320.1       | MT877324.1       | MT8773(28-31).1  |
| MT877333.1       | MT877335.1      | MT877338.1       | MT877340.1       | MT877357.1       |

(continued on next page)

(Table S1 continued)

|                  |                  |                    |                   |                   |
|------------------|------------------|--------------------|-------------------|-------------------|
| MT8773(59–61).1  | MT87736(5,6).1   | MT877379.1         | MT877381.1        | MT877383.1        |
| MT877409.1       | MT877418.1       | MT879619.1         | MT8808(73–88).1   | MT8823(10–25).1   |
| MT883(499–505).1 | MT8862(88–90).1  | MT886(292–318).1   | MT8863(21–60).1   | MT8863(62–73).1   |
| MT8863(75–86).1  | MT886407.1       | MT8864(09,10).1    | MT886413.1        | MT889692.1        |
| MT89021(0,1).1   | MT890230.1       | MT89023(5,6).1     | MT890238.1        | MT890240.1        |
| MT890243.1       | MT890277.1       | MT8902(79–81).1    | MT89028(5,6).1    | MT8902(88–90).1   |
| MT89029(2–6).1   | MT89030(1,2).1   | MT8903(09–11).1    | MT890313.1        | MT890316.1        |
| MT89032(0–2).1   | MT890330.1       | MT89033(5–8).1     | MT890340.1        | MT89034(4–9).1    |
| MT89035(2,3).1   | MT89035(5–8).1   | MT890462.1         | MT890669.1        | MT89(2963–3019).1 |
| MT893659.1       | MT89366(1,2).1   | MT893664.1         | MT8936(67–75).1   | MT893677.1        |
| MT8936(79–81).1  | MT89368(3–6).1   | MT893688.1         | MT893692.1        | MT89726(0,1).1    |
| MT8974(59–66).1  | MT9054(16–31).1  | MT90751(5–9).1     | MT907520.2        | MT911534.1        |
| MT9115(38–68).1  | MT911(796–801).1 | MT9118(03–25).1    | MT91182(7,8).1    | MT9130(38–59).1   |
| MT9130(61–71).1  | MT9130(73–90).1  | MT91309(2,3).1     | MT91309(5,6).1    | MT913(098–107).1  |
| MT9131(09–14).1  | MT91311(6–9).1   | MT9131(22–31).1    | MT91313(3–5).1    | MT9131(37–52).1   |
| MT9195(25–36).1  | MT9197(68–90).1  | MT9(19994–20040).1 | MT921009.1        | MT921159.1        |
| MT92116(5,6).1   | MT92598(0–9).1   | MT92599(1–7).1     | MT92896(0–8).1    | MT92897(0–6).1    |
| MT9289(79–85).1  | MT9289(87–92).1  | MT92899(4–6).1     | MT92(8998–9021).1 | MT9290(23–33).1   |
| MT9290(35–45).1  | MT929047.1       | MT9290(49–67).1    | MT9290(69–83).1   | MT929(085–101).1  |
| MT92910(4–7).1   | MT92911(0–2).1   | MT92911(5,6).1     | MT92911(8,9).1    | MT92912(3,4).1    |
| MT929128.1       | MT929130.1       | MT92913(4,5).1     | MT929148.1        | MT929150.1        |
| MT92915(3,4).1   | MT92915(6–9).1   | MT9373(17–26).1    | MT937808.1        | MT93781(0–8).1    |
| MT93782(0–7).1   | MT940449.1       | MT94045(1,2).1     | MT9404(58–62).1   | MT940464.1        |
| MT94047(2–9).1   | MT940(481–505).1 | MT9405(07–26).1    | MT941047.1        | MT941052.1        |
| MT94105(5,6).1   | MT9410(59–61).1  | MT941067.1         | MT941272.1        | MT941274.1        |
| MT941276.1       | MT941403.1       | MT9468(69–73).1    | MT9468(84–96).1   | MT9470(74–84).1   |
| MT9471(53–63).1  | MT9471(65–75).1  | MT9475(46–66).1    | MT947568.1        | MT9475(70–84).1   |
| MT94758(6–8).1   | MT94759(1–3).1   | MT947595.1         | MT9501(87–93).1   | MT950195.1        |

(continued on next page)

(Table S1 continued)

|                  |                 |                  |                  |                  |
|------------------|-----------------|------------------|------------------|------------------|
| MT95023(0,1).1   | MT95034(8,9).1  | MT950532.1       | MT950684.1       | MT950725.1       |
| MT950761.1       | MT951157.1      | MT951170.1       | MT951177.1       | MT951181.1       |
| MT951208.1       | MT95139(2,3).1  | MT95192(4-7).1   | MT9519(29-32).1  | MT9519(34-42).1  |
| MT9519(44-53).1  | MT9519(55-78).1 | MT951980.1       | MT952134.1       | MT9526(03-10).1  |
| MT9526(12-40).1  | MT9526(42-56).1 | MT9526(63-73).1  | MT952675.1       | MT9526(77-85).1  |
| MT95268(7,8).1   | MT95269(0-8).1  | MT95270(0-2).1   | MT953868.1       | MT9538(74-80).1  |
| MT953887.1       | MT95389(0,1).1  | MT95389(3-5).1   | MT953925.1       | MT953978.1       |
| MT95398(0,1).1   | MT953984.1      | MT953991.1       | MT953996.1       | MT954060.1       |
| MT954065.1       | MT954067.1      | MT954069.1       | MT95407(1,2).1   | MT954103.1       |
| MT954414.1       | MT954416.1      | MT954593.1       | MT954959.1       | MT954971.1       |
| MT955114.1       | MT955161.1      | MT9551(68-74).1  | MT955326.1       | MT955347.1       |
| MT955354.1       | MT955360.1      | MT956642.1       | MT956684.1       | MT95668(6-8).1   |
| MT956693.1       | MT956695.1      | MT956(698-704).1 | MT956706.1       | MT9567(09,10).1  |
| MT9567(12-24).1  | MT95672(6,7).1  | MT9567(29-32).1  | MT95673(5-8).1   | MT9567(40-62).1  |
| MT9567(67-70).1  | MT95677(2,3).1  | MT95677(5-7).1   | MT9567(83-91).1  | MT95679(3-9).1   |
| MT95680(1-6).1   | MT95681(3,4).1  | MT95691(1-8).1   | MT9582(05-63).1  | MT965767.1       |
| MT965769.1       | MT96607(6,7).1  | MT966079.1       | MT966081.1       | MT96608(3,4).1   |
| MT96608(6,7).1   | MT966089.1      | MT966091.1       | MT96609(4-7).1   | MT966(099-102).1 |
| MT96610(4-8).1   | MT966110.1      | MT966113.1       | MT966126.1       | MT966129.1       |
| MT966133.1       | MT966138.1      | MT96614(0-2).1   | MT96614(4-6).1   | MT96614(8,9).1   |
| MT9661(54-65).1  | MT966167.1      | MT966169.1       | MT966171.1       | MT966174.1       |
| MT9661(76-81).1  | MT966183.1      | MT96618(5,6).1   | MT96619(1-3).1   | MT966195.1       |
| MT966197.1       | MT966199.1      | MT966201.1       | MT96620(4-6).1   | MT9662(09-14).1  |
| MT96621(6-9).1   | MT9662(23-31).1 | MT96623(3,4).1   | MT96623(7-9).1   | MT966241.1       |
| MT96624(3-9).1   | MT96625(1-7).1  | MT966262.1       | MT967(899-910).1 | MT9679(18-84).1  |
| MT96805(1-5).1   | MT9680(57-77).1 | MT969352.1       | MT96935(4,5).1   | MT96935(7-9).1   |
| MT969361.1       | MT96936(3,4).1  | MT9693(66-91).1  | MT969393.1       | MT969395.1       |
| MT969(397-405).1 | MT9694(08-19).1 | MT9694(21-34).1  | MT9694(36-41).1  | MT969443.1       |

(continued on next page)

(Table S1 continued)

|                  |                  |                    |                   |                  |
|------------------|------------------|--------------------|-------------------|------------------|
| MT9694(45–60).1  | MT9694(62–70).1  | MT969473.1         | MT9694(75–85).1   | MT969(488–526).1 |
| MT969528.1       | MT96953(0–4).1   | MT969(536–627).1   | MT9696(29–32).1   | MT96963(5–8).1   |
| MT9696(40–83).1  | MT969(685–721).1 | MT9697(23–34).1    | MT9697(36–97).1   | MT969(799–842).1 |
| MT96984(4,5).1   | MT9698(47–58).1  | MT96986(0–4).1     | MT96986(6,7).1    | MT9698(69–72).1  |
| MT969(874–903).1 | MT9699(05–79).1  | MT9(69981–70013).1 | MT9700(56–64).1   | MT970078.1       |
| MT97008(1,2).1   | MT970084.1       | MT970086.1         | MT97008(8,9).1    | MT970091.1       |
| MT970112.1       | MT9701(49–55).1  | MT970(158–265).1   | MT9702(67–91).1   | MT970(293–315).1 |
| MT97031(7,8).1   | MT97032(1–3).1   | MT970328.1         | MT9703(30–50).1   | MT97035(5–7).1   |
| MT9703(59,60).1  | MT970362.1       | MT970367.1         | MT97037(0–4).1    | MT970376.1       |
| MT9703(79,80).1  | MT970382.1       | MT97038(7,8).1     | MT970390.1        | MT970393.1       |
| MT970396.1       | MT970403.1       | MT970406.1         | MT970408.1        | MT97041(0–2).1   |
| MT970414.1       | MT970416.1       | MT9704(19,20).1    | MT97042(2,3).1    | MT970(439–591).1 |
| MT970(593–708).1 | MT970(710–804).1 | MT9708(06–66).1    | MT9708(68–76).1   | MT9708(78–89).1  |
| MT970(891–932).1 | MT9709(34–44).1  | MT9709(46–81).1    | MT97(0983–1002).1 | MT97100(4–8).1   |
| MT9710(10–71).1  | MT971(074–144).1 | MT9711(46–53).1    | MT971(155–235).1  | MT9712(37–52).1  |
| MT971(254–413).1 | MT97141(5,6).1   | MT9714(18–24).1    | MT9714(26–47).1   | MT9714(49–56).1  |
| MT9714(58–69).1  | MT97147(1–8).1   | MT9714(80–93).1    | MT971(495–503).1  | MT97150(5–8).1   |
| MT97151(0–2).1   | MT97151(4,5).1   | MT9715(17–33).1    | MT9715(35–51).1   | MT97155(3–8).1   |
| MT97156(0–2).1   | MT971564.1       | MT971566.1         | MT97156(8,9).1    | MT97157(2–4).1   |
| MT97157(6,7).1   | MT971579.1       | MT97158(1–6).1     | MT9715(88–91).1   | MT97159(4–6).1   |
| MT971(599,600).1 | MT9716(02–13).1  | MT97161(5–9).1     | MT97162(1,2).1    | MT971627.1       |
| MT9716(29–32).1  | MT9716(34–47).1  | MT9716(49–67).1    | MT97167(0–3).1    | MT9716(75–89).1  |
| MT97169(1–8).1   | MT97170(0–7).1   | MT9717(09–16).1    | MT9717(18–31).1   | MT971(733–816).1 |
| MT9718(18–24).1  | MT9718(26–48).1  | MT9718(51–68).1    | MT9718(70–85).1   | MT971(887–903).1 |
| MT9719(05–10).1  | MT9719(12–21).1  | MT97192(5–7).1     | MT9719(30–40).1   | MT97194(2,3).1   |
| MT9719(45–54).1  | MT9719(57–79).1  | MT97(1981–2020).1  | MT97202(2–4).1    | MT9720(26–42).1  |
| MT9720(44–54).1  | MT9720(56–73).1  | MT9720(75–81).1    | MT972083.1        | MT9720(85–96).1  |
| MT972(098–100).1 | MT9721(11–23).1  | MT972125.1         | MT9721(28–33).1   | MT97213(5–7).1   |

(continued on next page)

(Table S1 continued)

|                  |                  |                 |                  |                  |
|------------------|------------------|-----------------|------------------|------------------|
| MT9721(39–45).1  | MT9721(47–53).1  | MT972155.1      | MT9721(58–66).1  | MT972168.1       |
| MT97217(1–8).1   | MT97218(1,2).1   | MT97218(4–9).1  | MT972(191–207).1 | MT9722(09–17).1  |
| MT97222(0,1).1   | MT97222(3–8).1   | MT97223(1–9).1  | MT9722(41–53).1  | MT972(255–308).1 |
| MT9723(10–20).1  | MT9723(22–33).1  | MT97233(5–8).1  | MT9723(40–53).1  | MT972355.1       |
| MT9723(57–95).1  | MT972(397–400).1 | MT9724(02–18).1 | MT97242(0,1).1   | MT9724(23–38).1  |
| MT97244(0–3).1   | MT9724(45–98).1  | MT972500.1      | MT9725(02–30).1  | MT9725(32–44).1  |
| MT972546.1       | MT9725(48–68).1  | MT97257(0,1).1  | MT97257(3–7).1   | MT972580.1       |
| MT972582.1       | MT9725(84–92).1  | MT97259(4–6).1  | MT972599.1       | MT972602.1       |
| MT97260(4,5).1   | MT9726(07–12).1  | MT97261(4–6).1  | MT97261(8,9).1   | MT97262(1,2).1   |
| MT97262(5–7).1   | MT9726(29–32).1  | MT9726(34–40).1 | MT97264(2,3).1   | MT97264(7–9).1   |
| MT97265(1–9).1   | MT972662.1       | MT9726(64–72).1 | MT972675.1       | MT9726(77–81).1  |
| MT97268(3,4).1   | MT9726(86–92).1  | MT972695.1      | MT972697.1       | MT9727(00–23).1  |
| MT972725.1       | MT9727(27–30).1  | MT97273(2–4).1  | MT9727(36–46).1  | MT9727(48–50).1  |
| MT97275(2–4).1   | MT972756.1       | MT972758.1      | MT97276(0–5).1   | MT9727(67–90).1  |
| MT97279(2–6).1   | MT972(799–814).1 | MT972816.1      | MT9728(18–51).1  | MT97285(3,4).1   |
| MT9728(56–74).1  | MT97287(6–9).1   | MT972881.1      | MT9728(83–96).1  | MT972(898–904).1 |
| MT9729(06–13).1  | MT97291(5–7).1   | MT9729(19–40).1 | MT972942.1       | MT972944.1       |
| MT97294(6–9).1   | MT97295(1,2).1   | MT97295(4,5).1  | MT972957.1       | MT9729(59,60).1  |
| MT972962.1       | MT97296(4–7).1   | MT9729(69,70).1 | MT97297(3–8).1   | MT97298(0,1).1   |
| MT97298(4–6).1   | MT97298(8,9).1   | MT97299(1–8).1  | MT97300(0–6).1   | MT97300(8,9).1   |
| MT973011.1       | MT9730(13–20).1  | MT9730(22–35).1 | MT9730(37–46).1  | MT9730(48–57).1  |
| MT973059.1       | MT97306(1–3).1   | MT9730(65–75).1 | MT973077.1       | MT97308(0–6).1   |
| MT9730(88–93).1  | MT97309(5–8).1   | MT97310(0,1).1  | MT9731(03–21).1  | MT973123.1       |
| MT9731(25–30).1  | MT97313(2–7).1   | MT973139.1      | MT97314(1–8).1   | MT9731(50–87).1  |
| MT973(189–214).1 | MT97321(6–8).1   | MT97322(0–2).1  | MT97322(5–8).1   | MT97323(0–7).1   |
| MT973239.1       | MT97324(1,2).1   | MT97324(4–7).1  | MT9732(49–60).1  | MT97326(2–7).1   |
| MT9732(69–76).1  | MT9732(78–86).1  | MT9732(88–92).1 | MT973(294–302).1 | MT97330(4–8).1   |
| MT9733(10–24).1  | MT9733(26–39).1  | MT97334(1,2).1  | MT973344.1       | MT97334(7,8).1   |

(continued on next page)

(Table S1 continued)

|                 |                  |                 |                  |                  |
|-----------------|------------------|-----------------|------------------|------------------|
| MT973353.1      | MT973356.1       | MT973358.1      | MT973366.1       | MT973371.1       |
| MT973373.1      | MT973376.1       | MT973378.1      | MT97338(0,1).1   | MT973389.1       |
| MT973391.1      | MT97339(5,6).1   | MT973402.1      | MT973409.1       | MT973419.1       |
| MT973421.1      | MT973424.1       | MT97342(6,7).1  | MT973431.1       | MT97343(5,6).1   |
| MT973438.1      | MT973448.1       | MT973454.1      | MT973484.1       | MT974069.1       |
| MT974071.1      | MT981(086–108).1 | MT9814(18–41).1 | MT9814(49–57).1  | MT9814(59–67).1  |
| MT981483.1      | MT981485.1       | MT9814(87–90).1 | MT9904(49,50).1  | MT9927(23–51).1  |
| MT993864.1      | MT993866.1       | MT993868.1      | MT9938(70–87).1  | MT994286.1       |
| MT99439(3–5).1  | MT994632.1       | MT994849.1      | MT994881.1       | MT994884.1       |
| MT9949(01–89).1 | MT99720(3–6).1   | MT9972(08–10).1 | MT99721(2–6).1   | MT9972(18–30).1  |
| MT99723(2,3).1  | MT99723(5–7).1   | MT99724(0–3).1  | MT997(685–747).1 | MT9977(62–71).1  |
| MT9979(49–94).1 | MT99844(2–4).1   | MW0003(54–61).1 | MW00036(3–6).1   | MW000369.1       |
| MW000371.1      | MW0012(32–88).1  | MW0016(67–75).1 | MW00169(2,3).1   | MW001(880–931).1 |
| MW00280(6–9).1  | MW00281(1–3).1   | MW00281(5–8).1  | MW00282(2,3).1   | MW00282(5–9).1   |
| MW002831.1      | MW00283(3,4).1   | MW00283(6,7).1  | MW004168.1       | MW00655(5–7).1   |
| MW0065(59–61).1 | MW00656(3–5).1   | MW006567.1      | MW006569.1       | MW006571.1       |
| MW00657(3–9).1  | MW006583.1       | MW00658(5,6).1  | MW00659(0–6).1   | MW006(598–601).1 |
| MW00660(3–7).1  | MW008562.1       | MW0085(65–71).1 | MW0085(73–85).1  | MW008587.1       |
| MW008590.1      | MW009055.1       | MW009107.1      | MW009255.1       | MW01002(8,9).1   |
| MW01023(5,6).1  | MW0102(45–55).1  | MW01176(2–8).1  | MW0122(66–79).1  | MW014808.1       |
| MW018448.1      | MW0200(61–86).1  | MW0214(54–61).1 | MW02146(3–6).1   | MW0214(68–70).1  |
| MW02151(2–4).1  | MW0233(88–94).1  | MW023404.1      | MW023409.1       | MW02341(5,6).1   |
| MW023418.1      | MW023424.1       | MW02342(8,9).1  | MW02343(5–7).1   | MW0234(39,40).1  |
| MW02344(2,3).1  | MW0234(46–50).1  | MW02345(2,3).1  | MW02345(6,7).1   | MW0234(59–62).1  |
| MW023466.1      | MW02347(0,1).1   | MW023474.1      | MW023476.1       | MW023478.1       |
| MW023480.1      | MW02348(2,3).1   | MW02348(6,7).1  | MW02349(4,5).1   | MW023498.1       |
| MW02350(0–2).1  | MW023511.1       | MW02351(6,7).1  | MW02352(2,3).1   | MW023525.1       |
| MW023532.1      | MW023542.1       | MW023547.1      | MW023550.1       | MW023552.1       |

(continued on next page)

(Table S1 continued)

|                   |                 |                 |                   |                  |
|-------------------|-----------------|-----------------|-------------------|------------------|
| MW023555.1        | MW023558.1      | MW023562.1      | MW023564.1        | MW023570.1       |
| MW023576.1        | MW0235(79,80).1 | MW023584.1      | MW023592.1        | MW023935.1       |
| MW030(193–278).1  | MW030985.1      | MW03098(8,9).1  | MW03099(3,4).1    | MW030996.1       |
| MW030998.1        | MW03100(0,1).1  | MW03100(3,4).1  | MW0310(09–11).1   | MW03101(4–8).1   |
| MW03102(1–3).1    | MW031025.1      | MW0310(27–30).1 | MW03103(3–5).1    | MW0310(37–40).1  |
| MW0310(43–56).1   | MW0310(58–61).1 | MW0310(63–74).1 | MW0310(77–80).1   | MW031082.1       |
| MW031084.1        | MW031086.1      | MW0310(88–93).1 | MW031(799–803).1  | MW03537(0,1).1   |
| MW03537(3,4).1    | MW0353(76–82).1 | MW03538(4–6).1  | MW03538(8,9).1    | MW03539(1–7).1   |
| MW035(399–416).1  | MW0354(18–20).1 | MW03542(2,3).1  | MW0354(25–56).1   | MW0354(58–66).1  |
| MW03546(8,9).1    | MW03547(1–6).1  | MW035484.1      | MW035(495–507).1  | MW035509.1       |
| MW03551(1,2).1    | MW0355(14–22).1 | MW0355(24–43).1 | MW03554(5,6).1    | MW0355(48–62).1  |
| MW0355(64–79).1   | MW0359(18–60).1 | MW03596(2–8).1  | MW03597(0–4).1    | MW035976.1       |
| MW035984.1        | MW03598(7,8).1  | MW035990.1      | MW035992.1        | MW035997.1       |
| MW03(5999,6000).1 | MW036003.1      | MW03600(6–8).1  | MW03601(0,1).1    | MW03601(3,4).1   |
| MW0360(16–24).1   | MW03602(6–9).1  | MW03603(1,2).1  | MW03603(4,5).1    | MW03603(8,9).1   |
| MW03604(1–4).1    | MW03604(6,7).1  | MW0360(49–51).1 | MW03605(3–7).1    | MW036060.1       |
| MW03606(2,3).1    | MW0360(67–74).1 | MW03608(0,1).1  | MW03608(3,4).1    | MW036086.1       |
| MW03923(4,5).1    | MW039450.1      | MW040606.1      | MW040617.1        | MW04062(1–5).1   |
| MW0406(27–36).1   | MW0406(38–55).1 | MW0406(59,60).1 | MW04066(4–9).1    | MW040673.1       |
| MW040675.1        | MW04067(8,9).1  | MW040681.1      | MW040683.1        | MW04068(6,7).1   |
| MW040690.1        | MW04069(3–7).1  | MW041156.1      | MW042923.1        | MW042925.1       |
| MW04701(6–8).1    | MW047085.1      | MW0473(07–18).1 | MW04(8997–9003).1 | MW0490(05–23).1  |
| MW052620.1        | MW05262(4,5).1  | MW052629.1      | MW0526(31–93).1   | MW053(297–319).1 |
| MW053708.1        | MW053750.1      | MW053767.1      | MW053869.1        | MW05387(4–6).1   |
| MW053883.1        | MW053885.1      | MW053921.1      | MW053925.1        | MW053929.1       |
| MW053935.1        | MW053938.1      | MW053950.1      | MW053957.1        | MW053961.1       |
| MW053976.1        | MW05398(0,1).1  | MW054091.1      | MW054103.1        | MW05410(8,9).1   |
| MW054137.1        | MW054154.1      | MW05603(2–4).1  | MW056078.1        | MW056086.1       |

(continued on next page)

(Table S1 continued)

|                  |                   |                  |                  |                 |
|------------------|-------------------|------------------|------------------|-----------------|
| MW05609(2,3).1   | MW056097.1        | MW05610(1,2).1   | MW05610(4,5).1   | MW056107.1      |
| MW0561(09–12).1  | MW05611(4–8).1    | MW056122.1       | MW05612(4–8).1   | MW056131.1      |
| MW05613(5–8).1   | MW056141.1        | MW05614(6,7).1   | MW056149.1       | MW05615(1,2).1  |
| MW05615(5,6).1   | MW056159.1        | MW056161.1       | MW0561(66–77).1  | MW0643(14–29).1 |
| MW064331.1       | MW0643(33–83).1   | MW064(385–430).1 | MW0644(32–70).1  | MW0644(72–94).1 |
| MW064(496–535).1 | MW06453(7–9).1    | MW06454(1–9).1   | MW064551.1       | MW06455(3–8).1  |
| MW0645(60–79).1  | MW0645(81–94).1   | MW064(597–681).1 | MW06468(3–5).1   | MW0646(87–92).1 |
| MW06469(4–7).1   | MW064699.1        | MW06470(1–5).1   | MW0647(07–17).1  | MW064719.1      |
| MW0647(21–30).1  | MW0647(32–67).1   | MW0647(69–72).1  | MW0647(74–80).1  | MW064782.1      |
| MW064(784–810).1 | MW0648(12–21).1   | MW0648(23–32).1  | MW06483(4,5).1   | MW0648(37–54).1 |
| MW0648(56–60).1  | MW0648(62–86).1   | MW064(888–938).1 | MW0649(40–82).1  | MW06498(4–7).1  |
| MW0649(89,90).1  | MW06(4992–5044).1 | MW0650(46–74).1  | MW065(076–101).1 | MW06510(3,4).1  |
| MW0651(06–30).1  | MW0651(32–44).1   | MW0651(46–56).1  | MW065158.1       | MW0651(60–98).1 |
| MW06520(0,1).1   | MW06520(3–8).1    | MW06521(0,1).1   | MW0652(13–24).1  | MW0652(26–40).1 |
| MW06524(2–5).1   | MW0652(47–73).1   | MW065(275–310).1 | MW0653(12–27).1  | MW0653(29–55).1 |
| MW065(357–422).1 | MW0654(24–83).1   | MW0676(75–82).1  | MW067(684–749).1 | MW06775(1–3).1  |
| MW0677(57–66).1  | MW0677(68–71).1   | MW06777(3–5).1   | MW067(777–800).1 | MW06780(2–6).1  |
| MW0678(09–18).1  | MW06782(0–3).1    | MW06782(5–7).1   | MW070033.1       | MW0700(35–46).1 |
| MW0700(48–51).1  | MW070054.1        | MW070057.1       | MW0700(59–82).1  | MW0700(84–93).1 |
| MW07009(6–9).1   | MW07010(1–3).1    | MW0701(05–13).1  | MW07573(2,3).1   | MW075735.1      |
| MW0757(37–42).1  | MW07574(4,5).1    | MW07574(7–9).1   | MW07575(1–8).1   | MW07576(0–8).1  |
| MW07577(7–9).1   | MW0757(81–91).1   | MW07579(3–9).1   | MW07580(1–4).1   | MW075808.1      |
| MW0774(66–83).1  | MW07748(5–7).1    | MW077489.1       | MW07749(1–8).1   | MW07750(0–2).1  |
| MW07941(8,9).1   | MW07942(1,2).1    | MW07942(8,9).1   | MW0798(19–42).1  | NC_045512.2     |



Table S2: List of SARS-CoV-1 genome accession codes.

---

---

|            |            |            |
|------------|------------|------------|
| AY278487.3 | AY304486.1 | AY338174.1 |
| AY348314.1 | AY394850.2 | AY572034.1 |
| AY772062.1 | DQ412042.1 | FJ882938.1 |
| FJ882954.1 |            |            |

---

---

Table S3: List of coronavirus (non-SARS) genome accession codes.

|                  |                 |                  |                 |                 |
|------------------|-----------------|------------------|-----------------|-----------------|
| AF304460.1       | AY278487.3      | AY304486.1       | AY338174.1      | AY348314.1      |
| AY391777.1       | AY394850.2      | AY567487.2       | AY572034.1      | AY58522(8,9).1  |
| AY597011.2       | AY772062.1      | AY884001.1       | AY9034(59,60).1 | DJ009246.1      |
| DQ339101.1       | DQ412042.1      | DQ415(896–914).1 | DQ44591(1,2).1  | FJ415324.1      |
| FJ882938.1       | FJ882954.1      | HM034837.1       | JN12983(4,5).1  | JQ7655(63–75).1 |
| JX104161.1       | JX50306(0,1).1  | JX504050.1       | JX524171.1      | KF430201.1      |
| KF514430.1       | KF51443(2,3).1  | KF53006(0,1).1   | KF5300(63–92).1 | KF53009(4–9).1  |
| KF5301(04–14).1  | KF68634(0–4).1  | KF686346.1       | KF745068.1      | KF917527.1      |
| KF923(886–925).1 | KF958702.1      | KJ36150(0,1).1   | KJ477102.1      | KJ556336.1      |
| KJ95821(8,9).1   | KP19861(0,1).1  | KP71992(7,8).1   | KT121572.1      | KT266906.1      |
| KT381875.1       | KT77955(5,6).1  | KU131570.1       | KU291448.1      | KU521535.1      |
| KX179500.1       | KX344031.1      | KX5389(64–79).1  | KY01428(1,2).1  | KY36990(5–8).1  |
| KY369909.2       | KY36991(0–4).1  | KY5549(67–75).1  | KY621348.1      | KY6749(14–21).1 |
| KY67494(1–3).1   | KY6847(59,60).1 | KY829118.1       | KY9673(56–61).1 | KY983583.1      |
| KY98358(5–8).1   | KY996417.1      | LG07610(3–5).1   | MF314143.1      | MF374983.2      |
| MF374984.1       | MF374985.2      | MF542265.1       | MG1977(09–23).1 | MG428699.1      |
| MG42870(1–6).1   | MG772808.1      | MG97744(4,5).1   | MG977447.1      | MG977449.1      |
| MG97745(1,2).1   | MH121121.1      | MH940245.1       | MK167038.1      | MK3036(19–25).1 |
| MK33404(3–7).1   | MN026164.1      | MN306018.1       | MN306036.1      | MN30604(0–3).1  |
| MN306046.1       | MN306053.1      | MN310476.1       | MN310478.1      | MN369046.1      |
| MT438(696–700).1 | NC_002645.1     | NC_005831.2      | NC_006213.1     | NC_006577.2     |

Table S4: Summary of primers and probes for each set. We only considered new sequences from each publication, that is, those which to our knowledge have not been reported previously.

| Name of Set       | Primer/probe   | Sequence 5' → 3'           |
|-------------------|----------------|----------------------------|
| Bhadra et al. [1] | E-PF           | TCGGAAGAGACAGGTACGTT       |
| Bhadra et al. [1] | E-Probe        | CATCCTTACTGCGCTTCGAT       |
| Bhadra et al. [1] | E-RP           | CAATATTGCAGCAGTACGCA       |
| Bhadra et al. [1] | M-PF           | CTGACCAGACCGCTTCTAG        |
| Bhadra et al. [1] | M-Probe        | GACCTGCCTAAAGAAATCACT      |
| Bhadra et al. [1] | M-RP           | GAAAGCGTTCGTGATGTAGC       |
| CDC               | 2019-nCoV_N1-F | GACCCCAAATCAGCGAAAT        |
| CDC               | 2019-nCoV_N1-P | ACCCCGCATTACGTTTGGTGGACC   |
| CDC               | 2019-nCoV_N1-R | TCTGGTTACTGCCAGTTGAATCTG   |
| CDC               | 2019-nCoV_N2-F | TTACAAACATTGGCCGCAAA       |
| CDC               | 2019-nCoV_N2-P | ACAATTTGCCCCAGCGCTTCAG     |
| CDC               | 2019-nCoV_N2-R | GCGCGACATTCCGAAGAA         |
| Corman et al. [2] | E_Sarbeco_F    | ACAGGTACGTTAATAGTTAATAGCGT |
| Corman et al. [2] | E_Sarbeco_P1   | ACACTAGCCATCCTTACTGCGCTTCG |
| Corman et al. [2] | E_Sarbeco_R    | ATATTGCAGCAGTACGCACACA     |
| Corman et al. [2] | N_Sarbeco_F    | CACATTGGCACCCGCAATC        |
| Corman et al. [2] | N_Sarbeco_P    | ACTTCCTCAAGGAACAACATTGCCA  |
| Corman et al. [2] | N_Sarbeco_R    | GAGGAACGAGAAGAGGCTTG       |

(continued on next page)

(Table S4 continued)

| Name of Set       | Primer/probe    | Sequence 5' → 3'           |
|-------------------|-----------------|----------------------------|
| Corman et al. [2] | RdRp_SARSr-FA   | GTGAAATGGTCATGTGTGGCGG     |
| Corman et al. [2] | RdRp_SARSr-FG   | GTGAGATGGTCATGTGTGGCGG     |
| Corman et al. [2] | RdRp_SARSr-P1-1 | CCAGGTGGAACGTCATCAGGTGATGC |
| Corman et al. [2] | RdRp_SARSr-P1-2 | CCAGGTGGAACGTCATCCGGTGATGC |
| Corman et al. [2] | RdRp_SARSr-P1-3 | CCAGGTGGAACATCATCAGGTGATGC |
| Corman et al. [2] | RdRp_SARSr-P1-4 | CCAGGTGGAACATCATCCGGTGATGC |
| Corman et al. [2] | RdRp_SARSr-P1-5 | CCAGGTGGTACGTCATCAGGTGATGC |
| Corman et al. [2] | RdRp_SARSr-P1-6 | CCAGGTGGTACGTCATCCGGTGATGC |
| Corman et al. [2] | RdRp_SARSr-P1-7 | CCAGGTGGTACATCATCAGGTGATGC |
| Corman et al. [2] | RdRp_SARSr-P1-8 | CCAGGTGGTACATCATCCGGTGATGC |
| Corman et al. [2] | RdRp_SARSr-P2   | CAGGTGGAACCTCATCAGGAGATGC  |
| Corman et al. [2] | RdRp_SARSr-R1   | CAAATGTTAAACACACTATTAGCATA |
| Corman et al. [2] | RdRp_SARSr-R2   | CAAATGTTAAAGACACTATTAGCATA |
| Corman et al. [2] | RdRp_SARSr-R3   | CAGATGTTAAACACACTATTAGCATA |
| Corman et al. [2] | RdRp_SARSr-R4   | CAGATGTTAAAGACACTATTAGCATA |
| Davda et al. [3]  | MF1             | TGGCAGATTCCAACGG           |
| Davda et al. [3]  | MF2             | CCTTGAACAATGGAACCTAG       |
| Davda et al. [3]  | MR1             | ACAGCGTCCTAGATGGTG         |
| Davda et al. [3]  | MR2             | AGCAATACGAAGATGTCCAC       |
| Davda et al. [3]  | N1F1            | AGGAAATTTTGGGGACCAGGAA     |
| Davda et al. [3]  | N1F2            | GATTACAAACATTGGCCGCAAATTG  |

(continued on next page)

(Table S4 continued)

| Name of Set        | Primer/probe | Sequence 5' → 3'             |
|--------------------|--------------|------------------------------|
| Davda et al. [3]   | N1R1         | CTGCTCATGGATTGTTGCAA         |
| Davda et al. [3]   | N1R2         | GAAATCATCCAAATCTGCAGCAG      |
| Davda et al. [3]   | N2F1         | GCCTCGGCAAAAACGTAC           |
| Davda et al. [3]   | N2F2         | GTAACACAAGCTTTCGGC           |
| Davda et al. [3]   | N2R1         | CTTGTGTGGTCTGCATGAG          |
| Davda et al. [3]   | N2R2         | TGAGTTGAGTCAGCACTG           |
| Davda et al. [3]   | Orf1abF1     | GGGAAATTGTTAAATTTATCTCAACCTG |
| Davda et al. [3]   | Orf1abF2     | AATTGTCGGTGGACAAATTGTC       |
| Davda et al. [3]   | Orf1abR1     | CTGGTGTACCAACCAATGGAGC       |
| Davda et al. [3]   | Orf1abR2     | ACTAGTAGGTTGTTCTAATGGTTG     |
| Grant et al. [4]   | NgeneProbe   | CTGTCACTAAGAAATCTGCTGCTGAGGC |
| Grant et al. [4]   | NgeneTaq1    | TCTGGTAAAGGCCAACAACAA        |
| Grant et al. [4]   | NgeneTaq2    | TGTATGCTTTAGTGGCAGTACG       |
| Hirotsu et al. [5] | NIID-N2-F    | AAATTTTGGGGACCAGGAAC         |
| Hirotsu et al. [5] | NIID-N2-P    | ATGTCGCGCATTGGCATGGA         |
| Hirotsu et al. [5] | NIID-N2-R    | TGGCAGCTGTGTAGGTCAAC         |
| Lanza et al. [6]   | UFRN_1_F     | GGGCATACACTCGCTATGTC         |
| Lanza et al. [6]   | UFRN_1_P     | TCTGTGGCCCTGATGGCTACCCT      |
| Lanza et al. [6]   | UFRN_1_R     | GCATGAAGCTTTACCAGCAC         |
| Lanza et al. [6]   | UFRN_2_F     | GGCTACTAACAATGCCATGC         |
| Lanza et al. [6]   | UFRN_2_P     | GGGTGGTAGTTGTGTTTTAAGCGG     |

(continued on next page)

(Table S4 continued)

| Name of Set      | Primer/probe | Sequence 5' → 3'             |
|------------------|--------------|------------------------------|
| Lanza et al. [6] | UFRN_2_R     | TAACATTTGGGCCGACAACA         |
| Lanza et al. [6] | UFRN_3_F     | TTCATGTTGTCTGGCCCAAAT        |
| Lanza et al. [6] | UFRN_3_P     | GAAGACATTCAACTTCTTAAGAGTGC   |
| Lanza et al. [6] | UFRN_3_R     | TGGTGCAAGTAGAACTTCGT         |
| Lanza et al. [6] | UFRN_4_F     | TGGTGCTAGGAGAGTGTGG          |
| Lanza et al. [6] | UFRN_4_P     | CTTATGAATGTCTTGACACTCGTTTATA |
| Lanza et al. [6] | UFRN_4_R     | CCCACATGGAAATGGCTTGAT        |
| Lanza et al. [6] | UFRN_5_F     | AGGGCACACTAGAACCAGAA         |
| Lanza et al. [6] | UFRN_5_P     | GGTCCAGACATGTTCCCTCGGAACT    |
| Lanza et al. [6] | UFRN_5_R     | CAATTTTCAGCAGGACAACGC        |
| Lanza et al. [6] | UFRN_6_F     | TCTTCACGACATTGGTAACCC        |
| Lanza et al. [6] | UFRN_6_P     | TACCTCAAGCTGATGTAGAATGGAAG   |
| Lanza et al. [6] | UFRN_6_R     | TCACTACAAGGCTGTGCATC         |
| Lanza et al. [6] | UFRN_7_F     | CTTCACGACATTGGTAACCCT        |
| Lanza et al. [6] | UFRN_7_P     | GTGTACCTCAAGCTGATGTAGAATGG   |
| Lanza et al. [6] | UFRN_7_R     | GTCACTACAAGGCTGTGCAT         |
| Lanza et al. [6] | UFRN_8_F     | GGCACAGGTGTTCTTACTGA         |
| Lanza et al. [6] | UFRN_8_P     | CCAACAATTTGGCAGAGACATTGC     |
| Lanza et al. [6] | UFRN_8_R     | TCAAGTGTCTGTGGATCACG         |
| Lanza et al. [6] | UFRN_9_F     | AGGCACAGGTGTTCTTACTG         |
| Lanza et al. [6] | UFRN_9_P     | TCCAACAATTTGGCAGAGACATTGC    |

(continued on next page)

(Table S4 continued)

| Name of Set        | Primer/probe       | Sequence 5' → 3'             |
|--------------------|--------------------|------------------------------|
| Lanza et al. [6]   | UFRN_9_R           | TCACGGACAGCATCAGTAGT         |
| Li et al. [7]      | S-1                | TGTACTTGGACAATCAAAAAGAGTTGAT |
| Li et al. [7]      | S-2                | AGGAGCAGTTGTGAAGTTCTTTTC     |
| Lu et al. [8]      | ORF1a-F            | AGAAGATTGGTTAGATGATGATAGT    |
| Lu et al. [8]      | ORF1a-P            | TCCTCACTGCCGTCTTGTGACCA      |
| Lu et al. [8]      | ORF1a-R            | TTCCATCTCTAATTGAGGTTGAACC    |
| Luminex            | China_N_F          | GGGGAACCTTCTCCTGCTAGAAT      |
| Luminex            | China_N_P          | TTGCTGCTGCTTGACAGATT         |
| Luminex            | China_N_R          | CAGACATTTTGCTCTCAAGCTG       |
| Luminex            | China_ORF_F        | CCCTGTGGGTTTTACTTAA          |
| Luminex            | China_ORF_P        | CCGTCTGCGGTATGTGGAAAGGTTATGG |
| Luminex            | China_ORF_R        | ACGATTGTGCATCAGCTGA          |
| Munnink et al. [9] | SARS-CoV-2_1_LEFT  | ACCAACCAACTTTTCGATCTCTTGT    |
| Munnink et al. [9] | SARS-CoV-2_1_RIGHT | CGAGCATCCGAACGTTTGATGA       |
| Munnink et al. [9] | SARS-CoV-2_2_LEFT  | TCGTACGTGGCTTTGGAGACTC       |
| Munnink et al. [9] | SARS-CoV-2_2_RIGHT | ATGCACTCAAGAGGGTAGCCAT       |
| Munnink et al. [9] | SARS-CoV-2_3_LEFT  | ACGAGCTTGGCACTGATCCTTA       |
| Munnink et al. [9] | SARS-CoV-2_3_RIGHT | GGTTGCATTCATTTGGTGACGC       |
| Munnink et al. [9] | SARS-CoV-2_4_LEFT  | ACACCTTCAATGGGGAATGTCC       |
| Munnink et al. [9] | SARS-CoV-2_4_RIGHT | AGGCACACTTGTTATGGCAACC       |
| Munnink et al. [9] | SARS-CoV-2_5_LEFT  | TGTCCAGCATGTCACAATTCAGA      |

(continued on next page)

(Table S4 continued)

| Name of Set        | Primer/probe        | Sequence 5' → 3'               |
|--------------------|---------------------|--------------------------------|
| Munnink et al. [9] | SARS-CoV-2_5_RIGHT  | TACAACACGAGCAGCCTCTGAT         |
| Munnink et al. [9] | SARS-CoV-2_6_LEFT   | TGTGAAAGGTTTGGATTATAAAGCATTCA  |
| Munnink et al. [9] | SARS-CoV-2_6_RIGHT  | ACAGGTGACAATTTGTCCACCG         |
| Munnink et al. [9] | SARS-CoV-2_7_LEFT   | TGGCACTGTTTATGAAAACTCAAACC     |
| Munnink et al. [9] | SARS-CoV-2_7_RIGHT  | TTTCGAGCAACATAAGCCCGTT         |
| Munnink et al. [9] | SARS-CoV-2_8_LEFT   | AGGGAGAAACACTTCCCACAGA         |
| Munnink et al. [9] | SARS-CoV-2_8_RIGHT  | AATCAATGCCCAGTGGTGTAAGT        |
| Munnink et al. [9] | SARS-CoV-2_9_LEFT   | TCACTTTTGAAGTTGATGAAAGGATTGA   |
| Munnink et al. [9] | SARS-CoV-2_9_RIGHT  | GATTGTCCTCACTGCCGTCTTG         |
| Munnink et al. [9] | SARS-CoV-2_11_LEFT  | AAACATGGAGGAGGTGTTGCAG         |
| Munnink et al. [9] | SARS-CoV-2_11_RIGHT | TCTTGTTTTCTCTGTTCAACTGAAGGT    |
| Munnink et al. [9] | SARS-CoV-2_12_RIGHT | CCTGACCCGGGTAAGTGGTTAT         |
| Munnink et al. [9] | SARS-CoV-2_13_LEFT  | GCTCCATATATAGTGGGTGATGTTGT     |
| Munnink et al. [9] | SARS-CoV-2_13_RIGHT | AGCCATGTGTTACATAGCCAAGTG       |
| Munnink et al. [9] | SARS-CoV-2_14_LEFT  | GTTTCAACTATACAGCGTAAATATAAGGGT |
| Munnink et al. [9] | SARS-CoV-2_14_RIGHT | CGTGTGGAGGTTAATGTTGTCTACT      |
| Munnink et al. [9] | SARS-CoV-2_15_LEFT  | CTATTCTGGACAATCTACACAAGTAGGT   |
| Munnink et al. [9] | SARS-CoV-2_15_RIGHT | AGCATCTTGTAGAGCAGGTGGA         |
| Munnink et al. [9] | SARS-CoV-2_16_LEFT  | AGGTACATGTCAGCATTAAATCACACT    |
| Munnink et al. [9] | SARS-CoV-2_16_RIGHT | AGTTCATACTGAGCAGGTGGTG         |
| Munnink et al. [9] | SARS-CoV-2_17_LEFT  | GCTGTTATGTACATGGGCACACT        |

(continued on next page)



(Table S4 continued)

| Name of Set        | Primer/probe        | Sequence 5' → 3'              |
|--------------------|---------------------|-------------------------------|
| Munnink et al. [9] | SARS-CoV-2_17_RIGHT | GCTTGCGTTTGGATATGGTTGG        |
| Munnink et al. [9] | SARS-CoV-2_18_LEFT  | CAGTTACACAACAACCATAAAAACCAGT  |
| Munnink et al. [9] | SARS-CoV-2_18_RIGHT | GATTATCCATTCCCTGCGCGTC        |
| Munnink et al. [9] | SARS-CoV-2_19_LEFT  | TGTTACATAAACCTATTGTTTGGCATGT  |
| Munnink et al. [9] | SARS-CoV-2_19_RIGHT | TCCAAGGGACTATTAACAGCA         |
| Munnink et al. [9] | SARS-CoV-2_20_LEFT  | TACAGAAGAGGTTGGCCACACA        |
| Munnink et al. [9] | SARS-CoV-2_21_LEFT  | AGCAAAGAATACTGTAAAGAGTGTCGG   |
| Munnink et al. [9] | SARS-CoV-2_21_RIGHT | TCGGGGCCATTTGTACAAGATT        |
| Munnink et al. [9] | SARS-CoV-2_22_LEFT  | AGTTGCAGAGTGGTTTTTGGCA        |
| Munnink et al. [9] | SARS-CoV-2_22_RIGHT | ACTGTAGTGACAAGTCTCTCGCA       |
| Munnink et al. [9] | SARS-CoV-2_23_LEFT  | ACTATTGTTAATGGTGTTAGAAGGTCCT  |
| Munnink et al. [9] | SARS-CoV-2_23_RIGHT | GCAACTTCCGCACTATCACCAA        |
| Munnink et al. [9] | SARS-CoV-2_24_LEFT  | AGCTAATAACACTAAAGGTTTCATTGCCT |
| Munnink et al. [9] | SARS-CoV-2_24_RIGHT | TGACTTTTTGCTACCTGCGCAT        |
| Munnink et al. [9] | SARS-CoV-2_25_LEFT  | TGTCTTAAATTGTCACATCAATCTGACAT |
| Munnink et al. [9] | SARS-CoV-2_25_RIGHT | TCACGAGTGACACCACCATCAA        |
| Munnink et al. [9] | SARS-CoV-2_26_LEFT  | TGGTTGAAGCAGTTAATTAAGTTACT    |
| Munnink et al. [9] | SARS-CoV-2_26_RIGHT | TTCAGCAGCCAAAACACAAGCT        |
| Munnink et al. [9] | SARS-CoV-2_27_LEFT  | CTGGTTTGCCTGGCAGATATT         |
| Munnink et al. [9] | SARS-CoV-2_27_RIGHT | TCTACACCACAGAAAACCTCCTGGT     |
| Munnink et al. [9] | SARS-CoV-2_28_LEFT  | CCTTGAAGGTTCTGTTAGAGTGGT      |

(continued on next page)

(Table S4 continued)

| Name of Set        | Primer/probe        | Sequence 5' → 3'               |
|--------------------|---------------------|--------------------------------|
| Munnink et al. [9] | SARS-CoV-2_28_RIGHT | AGGTGTGAACATAACCATCCACTG       |
| Munnink et al. [9] | SARS-CoV-2_29_LEFT  | ACAGTCATGTAGTTGCCTTTAATACTTTAC |
| Munnink et al. [9] | SARS-CoV-2_29_RIGHT | GAGCCTTTGCGAGATGACAACA         |
| Munnink et al. [9] | SARS-CoV-2_30_LEFT  | AGAAATGTATCTAAAGTTGCGTAGTGATG  |
| Munnink et al. [9] | SARS-CoV-2_30_RIGHT | CCCTGAGTTGAACATTACCAGCC        |
| Munnink et al. [9] | SARS-CoV-2_31_LEFT  | AACGGTCTTTGGCTTGATGACG         |
| Munnink et al. [9] | SARS-CoV-2_31_RIGHT | ACCTTCTAAGTCTGTGCCAGCA         |
| Munnink et al. [9] | SARS-CoV-2_32_LEFT  | TACCAATGTGCTATGAGGCCCA         |
| Munnink et al. [9] | SARS-CoV-2_32_RIGHT | GCACTACCCAATATGGTACGTCC        |
| Munnink et al. [9] | SARS-CoV-2_33_LEFT  | TGTGGCTATGAAGTACAATTATGAACCT   |
| Munnink et al. [9] | SARS-CoV-2_33_RIGHT | AGCTACAGTGGCAAGAGAAGGT         |
| Munnink et al. [9] | SARS-CoV-2_34_LEFT  | GTCCAGAGTACTCAATGGTCTTTGT      |
| Munnink et al. [9] | SARS-CoV-2_34_RIGHT | ACCTCTGGCCAAAACATGACA          |
| Munnink et al. [9] | SARS-CoV-2_35_LEFT  | TGGTGCTAGGAGAGTGTGGACA         |
| Munnink et al. [9] | SARS-CoV-2_35_RIGHT | GGCTACTTTGATACAAGGTTTGCC       |
| Munnink et al. [9] | SARS-CoV-2_36_LEFT  | CGCTACTTTAGACTGACTCTTGGTG      |
| Munnink et al. [9] | SARS-CoV-2_36_RIGHT | ATCACCATTAGCAACAGCCTGC         |
| Munnink et al. [9] | SARS-CoV-2_37_LEFT  | CTTTCCATGCAGGGTGCTGTAG         |
| Munnink et al. [9] | SARS-CoV-2_37_RIGHT | GTTTGGCTGCTGTTGTAAGAGGT        |
| Munnink et al. [9] | SARS-CoV-2_38_LEFT  | AGATCTGAGGACAAGAGGGCAA         |
| Munnink et al. [9] | SARS-CoV-2_38_RIGHT | TGTCATCAGTGCAAGCAGTTTGT        |

(continued on next page)

(Table S4 continued)

| Name of Set        | Primer/probe        | Sequence 5' → 3'               |
|--------------------|---------------------|--------------------------------|
| Munnink et al. [9] | SARS-CoV-2_39_LEFT  | ACAATTCACCTAATTTAGCATGGCCT     |
| Munnink et al. [9] | SARS-CoV-2_39_RIGHT | TTGGTTGTCCCCACTAGCTAG          |
| Munnink et al. [9] | SARS-CoV-2_40_LEFT  | GGTATGGTACTTGGTAGTTTAGCTGC     |
| Munnink et al. [9] | SARS-CoV-2_40_RIGHT | ACGATTGTGCATCAGCTGACTG         |
| Munnink et al. [9] | SARS-CoV-2_41_LEFT  | AGTATGTACAAATACCTACAACCTTGTGCT |
| Munnink et al. [9] | SARS-CoV-2_41_RIGHT | AGCATAGACGAGGTCTGCCATT         |
| Munnink et al. [9] | SARS-CoV-2_42_LEFT  | TCTCTAACTACCAACATGAAGAAACAATTT |
| Munnink et al. [9] | SARS-CoV-2_42_RIGHT | GCAGTTAAAGCCCTGGTCAAGG         |
| Munnink et al. [9] | SARS-CoV-2_43_LEFT  | TGGTATTGTTGGTGTACTGACATTAGA    |
| Munnink et al. [9] | SARS-CoV-2_43_RIGHT | AGGGTCAGCAGCATAACAAGT          |
| Munnink et al. [9] | SARS-CoV-2_44_LEFT  | TGGACCACTAGTGAGAAAAATATTTGTTG  |
| Munnink et al. [9] | SARS-CoV-2_44_RIGHT | ACAGCCACCATCGTAACAATCA         |
| Munnink et al. [9] | SARS-CoV-2_45_LEFT  | CACTTCTTCTTTGCTCAGGATGGT       |
| Munnink et al. [9] | SARS-CoV-2_45_RIGHT | AACATGTTGTGCCAACCACCAT         |
| Munnink et al. [9] | SARS-CoV-2_46_LEFT  | TGCAAAGAATAGAGCTCGCACC         |
| Munnink et al. [9] | SARS-CoV-2_46_RIGHT | TGCATTAACATTGGCCGTGACA         |
| Munnink et al. [9] | SARS-CoV-2_47_LEFT  | TGTAGCTTGTACACCCGTTTCT         |
| Munnink et al. [9] | SARS-CoV-2_47_RIGHT | AGTAAGGTCAGTCTCAGTCCAACA       |
| Munnink et al. [9] | SARS-CoV-2_48_LEFT  | CTCTCTGACGATGCTGTTGTGT         |
| Munnink et al. [9] | SARS-CoV-2_48_RIGHT | TGCGGTGTGTACATAGCCTCAT         |
| Munnink et al. [9] | SARS-CoV-2_49_LEFT  | AGGAGTATGCTGATGTCTTTCATTTGT    |

(continued on next page)

(Table S4 continued)

| Name of Set        | Primer/probe        | Sequence 5' → 3'                |
|--------------------|---------------------|---------------------------------|
| Munnink et al. [9] | SARS-CoV-2_49_RIGHT | CACCAGCATTTGTCCAGTCACA          |
| Munnink et al. [9] | SARS-CoV-2_50_LEFT  | AGGAGGTATGAGCTATTATTGTAAATCACA  |
| Munnink et al. [9] | SARS-CoV-2_50_RIGHT | GTTGTACCTCGGTAAACAACAGCA        |
| Munnink et al. [9] | SARS-CoV-2_51_LEFT  | TCTTTCATGGGAAGTTGGTAAACCT       |
| Munnink et al. [9] | SARS-CoV-2_51_RIGHT | TCACATAGTGCATCAACAGCGG          |
| Munnink et al. [9] | SARS-CoV-2_52_LEFT  | TGCAAATTATCAAAAGGTTGGTATGCA     |
| Munnink et al. [9] | SARS-CoV-2_52_RIGHT | CCGAGGAACATGTCTGGACCTA          |
| Munnink et al. [9] | SARS-CoV-2_53_RIGHT | CAAGAGTGAGCTGTTTCAGTGGT         |
| Munnink et al. [9] | SARS-CoV-2_54_LEFT  | TGGAGAAAAGCTGTCTTTATTTACCT      |
| Munnink et al. [9] | SARS-CoV-2_54_RIGHT | GCTTCTTCGCGGGTGATAAACA          |
| Munnink et al. [9] | SARS-CoV-2_55_LEFT  | TGTTGACACTAAATTCAAAACTGAAGGT    |
| Munnink et al. [9] | SARS-CoV-2_55_RIGHT | TGTCAACTCAAAGCCATGTGCC          |
| Munnink et al. [9] | SARS-CoV-2_56_LEFT  | ACCACCGCCTGGAGATCAATTT          |
| Munnink et al. [9] | SARS-CoV-2_56_RIGHT | CGCTTAACAAAGCACTCGTGGA          |
| Munnink et al. [9] | SARS-CoV-2_57_LEFT  | CGTTTATGATTGATGTTCAACAATGGGG    |
| Munnink et al. [9] | SARS-CoV-2_57_RIGHT | ACAACCAGGCAAGTTAAGGTTAGA        |
| Munnink et al. [9] | SARS-CoV-2_58_LEFT  | GCCTTG TAGTGACAAAGCTTATAAAATAGA |
| Munnink et al. [9] | SARS-CoV-2_58_RIGHT | AAACCCACAAGCTAAAGCCAGC          |
| Munnink et al. [9] | SARS-CoV-2_59_LEFT  | AGTCTCATGGAAAACAAGTAGTGCA       |
| Munnink et al. [9] | SARS-CoV-2_59_RIGHT | ATTAGCAGCAATGTCCACACCC          |
| Munnink et al. [9] | SARS-CoV-2_60_LEFT  | CAGGGTGAAGTACCAGTTTCTATCATT     |

(continued on next page)

(Table S4 continued)

| Name of Set        | Primer/probe        | Sequence 5' → 3'               |
|--------------------|---------------------|--------------------------------|
| Munnink et al. [9] | SARS-CoV-2_60_RIGHT | GAGTAAAGTAAGTTTCAGGTAATTGTTGG  |
| Munnink et al. [9] | SARS-CoV-2_61_LEFT  | AGAAATGCCCGTAATGGTGTCT         |
| Munnink et al. [9] | SARS-CoV-2_61_RIGHT | TGAACCTGTTTGCGCATCTGTT         |
| Munnink et al. [9] | SARS-CoV-2_62_LEFT  | TCGTTTATGGAGATTTTAGTCATAGTCAGT |
| Munnink et al. [9] | SARS-CoV-2_62_RIGHT | TTGCGACATTCATCATTATGCCTTT      |
| Munnink et al. [9] | SARS-CoV-2_63_LEFT  | TGGCCATGTAGAAACATTTTACCCA      |
| Munnink et al. [9] | SARS-CoV-2_63_RIGHT | ATAGCCACGGAACCTCCAAGAG         |
| Munnink et al. [9] | SARS-CoV-2_64_LEFT  | CTGTACATACAGCTAATAAATGGGATCTCA |
| Munnink et al. [9] | SARS-CoV-2_64_RIGHT | TTTGACCTTCTTTTAAAGACATAACAGCA  |
| Munnink et al. [9] | SARS-CoV-2_65_RIGHT | ACCTCTTAGTACCATTGGTCCCA        |
| Munnink et al. [9] | SARS-CoV-2_66_RIGHT | ACCCTGTTTTTCCTTCAAGGTCC        |
| Munnink et al. [9] | SARS-CoV-2_67_LEFT  | CAATTTTGTAATGATCCATTTTGGGTGT   |
| Munnink et al. [9] | SARS-CoV-2_67_RIGHT | GGTCAAGTGCACAGTCTACAGC         |
| Munnink et al. [9] | SARS-CoV-2_68_LEFT  | ACATAGAAGTTATTTGACTCCTGGTGA    |
| Munnink et al. [9] | SARS-CoV-2_68_RIGHT | CCCTGGAGCGATTTGTCTGACT         |
| Munnink et al. [9] | SARS-CoV-2_69_LEFT  | ACTGTGTTGCTGATTATCTGTCCCT      |
| Munnink et al. [9] | SARS-CoV-2_69_RIGHT | TAGGTCCACAAACAGTTGCTGG         |
| Munnink et al. [9] | SARS-CoV-2_70_LEFT  | CCGGTAGCACACCTTGTAATGG         |
| Munnink et al. [9] | SARS-CoV-2_70_RIGHT | CCCCTATTAACAGCCTGCACG          |
| Munnink et al. [9] | SARS-CoV-2_71_LEFT  | ACTTCTAACCAGGTTGCTGTTCTT       |
| Munnink et al. [9] | SARS-CoV-2_71_RIGHT | CAGCTATTCCAGTTAAAGCACGGT       |

(continued on next page)

(Table S4 continued)

| Name of Set        | Primer/probe        | Sequence 5' → 3'           |
|--------------------|---------------------|----------------------------|
| Munnink et al. [9] | SARS-CoV-2_72_LEFT  | TGTTACCACAGAAATTCTACCAGTGT |
| Munnink et al. [9] | SARS-CoV-2_72_RIGHT | TACCCGCTAACAGTGCAGAAGT     |
| Munnink et al. [9] | SARS-CoV-2_73_LEFT  | CTTGCAGATGCTGGCTTCATCA     |
| Munnink et al. [9] | SARS-CoV-2_73_RIGHT | TGCACTTCAGCCTCAACTTTGT     |
| Munnink et al. [9] | SARS-CoV-2_74_LEFT  | GTGCACTTGGAAAACCTCAAGATGT  |
| Munnink et al. [9] | SARS-CoV-2_74_RIGHT | TGTTACAAACCAGTGTGTGCCA     |
| Munnink et al. [9] | SARS-CoV-2_75_LEFT  | CTTCCCTCAGTCAGCACCTCAT     |
| Munnink et al. [9] | SARS-CoV-2_75_RIGHT | CAAGCCAGCTATAAAACCTAGCCA   |
| Munnink et al. [9] | SARS-CoV-2_76_LEFT  | GTTGATTTAGGTGACATCTCTGGCA  |
| Munnink et al. [9] | SARS-CoV-2_76_RIGHT | AGCGCTCTGAAAAACAGCAAGA     |
| Munnink et al. [9] | SARS-CoV-2_77_LEFT  | TGGAACTGTAACCTTTGAAGCAAGGT |
| Munnink et al. [9] | SARS-CoV-2_77_RIGHT | GACTTGTTGTGCCATCACCTGA     |
| Munnink et al. [9] | SARS-CoV-2_78_LEFT  | CTTTGGCTTTGCTGGAAATGCC     |
| Munnink et al. [9] | SARS-CoV-2_78_RIGHT | GTGCTTACAAAGGCACGCTAGT     |
| Munnink et al. [9] | SARS-CoV-2_79_LEFT  | GGTGTTGAACATGTTACCTTCTTCAT |
| Munnink et al. [9] | SARS-CoV-2_79_RIGHT | GTACCGTTGGAATCTGCCATGG     |
| Munnink et al. [9] | SARS-CoV-2_80_LEFT  | ACGTGAGTCTTGTAACCTTCTTTTT  |
| Munnink et al. [9] | SARS-CoV-2_80_RIGHT | AATGACCACATGGAACGCGTAC     |
| Munnink et al. [9] | SARS-CoV-2_81_LEFT  | CTTGTTTTGTGCTTGCTGCTGT     |
| Munnink et al. [9] | SARS-CoV-2_81_RIGHT | ACTGCTACTGGAATGGTCTGTGT    |
| Munnink et al. [9] | SARS-CoV-2_82_LEFT  | GGACCTGCCTAAAGAAATCACTGT   |

(continued on next page)

(Table S4 continued)

| Name of Set        | Primer/probe        | Sequence 5' → 3'             |
|--------------------|---------------------|------------------------------|
| Munnink et al. [9] | SARS-CoV-2_82_RIGHT | TGCCCTCGTATGTTCCAGAAGA       |
| Munnink et al. [9] | SARS-CoV-2_83_LEFT  | TGAAGAGCAACCAATGGAGATTGA     |
| Munnink et al. [9] | SARS-CoV-2_83_RIGHT | TGTTCGTTTtaggCGTGACAAGT      |
| Munnink et al. [9] | SARS-CoV-2_84_LEFT  | CTTCACACTCAAAGAAAGACAGAATGA  |
| Munnink et al. [9] | SARS-CoV-2_84_RIGHT | ACGAACAACGCCTACAAGACT        |
| Munnink et al. [9] | SARS-CoV-2_85_LEFT  | AGCACCTTTAATTGAATTGTGCGTG    |
| Munnink et al. [9] | SARS-CoV-2_85_RIGHT | CGTCTGGTAGCTCTTCGGTAGT       |
| Munnink et al. [9] | SARS-CoV-2_86_LEFT  | GGCCCAAGGTTTACCCAATAA        |
| Munnink et al. [9] | SARS-CoV-2_86_RIGHT | CTGTTGCGACTACGTGATGAGG       |
| Munnink et al. [9] | SARS-CoV-2_87_LEFT  | AAAAGATCACATTGGCACCCGC       |
| Munnink et al. [9] | SARS-CoV-2_87_RIGHT | CGACATTCCGAAGAACGCTGAA       |
| Munnink et al. [9] | SARS-CoV-2_88_LEFT  | TAACACAAGCTTTCGGCAGACG       |
| Munnink et al. [9] | SARS-CoV-2_88_RIGHT | GTGGTCTGCATGAGTTTtagGCC      |
| Munnink et al. [9] | SARS-CoV-2_89_LEFT  | AGGCTGATGAACTCAAGCCTT        |
| Munnink et al. [9] | SARS-CoV-2_89_RIGHT | AAAATCACATGGGGATAGCACTACT    |
| Nalla et al. [10]  | nCoV_2019-F         | CAAATTCTATGGTGGTTGGCACA      |
| Nalla et al. [10]  | nCoV_2019-P1        | ATAATCCAACCCATAAG            |
| Nalla et al. [10]  | nCoV_2019-P2        | ATAATCCAACCCATGAG            |
| Nalla et al. [10]  | nCoV_2019-R         | GGCATGGCTCTATCACATTTAGG      |
| Niu et al. [11]    | E-F                 | TTCTTGCTTTCGTGGTATTC         |
| Niu et al. [11]    | E-P                 | GTTACTAGCCATCCTTACTGCGCTTCGA |

(continued on next page)

(Table S4 continued)

| Name of Set      | Primer/probe             | Sequence 5' → 3'          |
|------------------|--------------------------|---------------------------|
| Niu et al. [11]  | E-R                      | CACGTTAACAATATTGCAGC      |
| Niu et al. [11]  | RdRp-F                   | GGTCATGTGTGGCGGCTC        |
| Niu et al. [11]  | RdRp-P                   | CTATATGTAAACCAGGTGGAAC    |
| Niu et al. [11]  | RdRp-R                   | GCTGTAACAGCTTGACAAATGAAAG |
| Park et al. [12] | SARS-CoV-2_IBS_E2-F      | TTCGGAAGAGACAGGTACGTTA    |
| Park et al. [12] | SARS-CoV-2_IBS_E2-R      | AGCAGTACGCACACAATCG       |
| Park et al. [12] | SARS-CoV-2_IBS_N1-F      | CAATGCTGCAATCGTGCTAC      |
| Park et al. [12] | SARS-CoV-2_IBS_N1-R      | GTTGCGACTACGTGATGAGG      |
| Park et al. [12] | SARS-CoV-2_IBS_RdRP2-F   | AGAATAGAGCTCGCACCGTA      |
| Park et al. [12] | SARS-CoV-2_IBS_RdRP2-R   | CTCCTCTAGTGGCGGCTATT      |
| Park et al. [12] | SARS-CoV-2_IBS_S2-F      | GCTGGTGCTGCAGCTTATTA      |
| Park et al. [12] | SARS-CoV-2_IBS_S2-R      | AGGGTCAAGTGCACAGTCTA      |
| Park et al. [12] | SARS-CoV-2_IBS_m_N1-F    | AAGGAAATTTTGGGGACCAG      |
| Park et al. [12] | SARS-CoV-2_IBS_m_N1-R    | GAGTCAGCACTGCTCATGGA      |
| Park et al. [12] | SARS-CoV-2_IBS_m_N2-F    | AAAGGCCAACAACAACAAGG      |
| Park et al. [12] | SARS-CoV-2_IBS_m_N2-R    | GCTCTGTTGGTGGGAATGTT      |
| Park et al. [12] | SARS-CoV-2_IBS_m_RdRP1-F | GCTCGCAAACATACAACGTG      |
| Park et al. [12] | SARS-CoV-2_IBS_m_RdRP1-R | CATTAACATTGGCCGTGACA      |
| Park et al. [12] | SARS-CoV-2_IBS_m_RdRP2-F | TGAAATCAATAGCCGCCACT      |
| Park et al. [12] | SARS-CoV-2_IBS_m_RdRP2-R | TGTTTGCGAGCAAGAACAAG      |
| Park et al. [12] | SARS-CoV-2_IBS_m_S1-F    | CAGATGCTGGCTTCATCAA       |

(continued on next page)



(Table S4 continued)

| Name of Set        | Primer/probe          | Sequence 5' → 3'            |
|--------------------|-----------------------|-----------------------------|
| Park et al. [12]   | SARS-CoV-2_IBS_m.S1-R | GGTTGGCAATCAATTTTTGG        |
| Park et al. [12]   | SARS-CoV-2_IBS_m.S2-F | ACTGTTTTGCCACCTTTGCT        |
| Park et al. [12]   | SARS-CoV-2_IBS_m.S2-R | AGCTTGTGCATTTTGGTTGA        |
| Rahman et al. [13] | M-F                   | CAAGGACCTGCCTAAAGAAATCAC    |
| Rahman et al. [13] | M-P                   | TGTTGCTACATCACGAACGCTTTC    |
| Rahman et al. [13] | M-R                   | ACGCTGCGAAGCTCCCAAT         |
| Rahman et al. [13] | ORF1b-F               | CATGGTGGACAGCCTTTGTTAC      |
| Rahman et al. [13] | ORF1b-P               | AATGTGAATGCGTCATCATCTGAAGCA |
| Rahman et al. [13] | ORF1b-R               | TCGCGTGGTTTGCCAAGAT         |
| Toptan et al. [14] | M-475-F               | TGTGACATCAAGGACCTGCC        |
| Toptan et al. [14] | M-507-P               | TGTTGCTACATCACGAACGC        |
| Toptan et al. [14] | M-574-R               | CTGAGTCACCTGCTACACGC        |
| Toptan et al. [14] | S-1850-F              | GCACAGAAGTCCCTGTTGCT        |
| Toptan et al. [14] | S-1884-P              | ACTTACTCCTACTTGGCGTGT       |
| Toptan et al. [14] | S-1949-R              | AAACAGCCTGCACGTGTTTG        |
| Vogels et al. [15] | HKU-N-F               | TAATCAGACAAGGAACTGATTA      |
| Vogels et al. [15] | HKU-N-P               | GCAAATTGTGCAATTTGCGG        |
| Vogels et al. [15] | HKU-N-R               | CGAAGGTGTGACTTCCATG         |
| Vogels et al. [15] | HKU-ORF1-F1           | TGGGGCTTTACAGGTAACCT        |
| Vogels et al. [15] | HKU-ORF1-F2           | TGGGGCTTTACGGGTAACCT        |
| Vogels et al. [15] | HKU-ORF1-F3           | TGGGGTTTTACAGGTAACCT        |

(continued on next page)

(Table S4 continued)

| Name of Set        | Primer/probe         | Sequence 5' → 3'          |
|--------------------|----------------------|---------------------------|
| Vogels et al. [15] | HKU-ORF1-F4          | TGGGGTTTTACGGGTAACCT      |
| Vogels et al. [15] | HKU-ORF1-P1          | TAGTTGTGATGCAATCATGACTAG  |
| Vogels et al. [15] | HKU-ORF1-P2          | TAGTTGTGATGCTATCATGACTAG  |
| Vogels et al. [15] | HKU-ORF1-R1          | AACACGCTTAACAAAGCACTC     |
| Vogels et al. [15] | HKU-ORF1-R2          | AACGCGCTTAACAAAGCACTC     |
| WHO                | NIID_WH-1_F24381     | TCAAGACTCACTTTCTTCCAC     |
| WHO                | NIID.WH-1.F501       | TTCGGATGCTCGAACTGCACC     |
| WHO                | NIID_WH-1.F509       | CTCGAACTGCACCTCATGG       |
| WHO                | NIID.WH-1.R24873     | ATTTGAAACAAAGACACCTTCCAC  |
| WHO                | NIID.WH-1.R854       | CAGAAGTTGTTATCGACATAGC    |
| WHO                | NIID.WH-1.R913       | CTTTACCAGCACGTGCTAGAAGG   |
| WHO                | NIID.WH-1_Seq_F24383 | AAGACTCACTTTCTTCCACAG     |
| WHO                | NIID.WH-1_Seq_F519   | ACCTCATGGTCATGTTATGG      |
| WHO                | NIID.WH-1_Seq_R24865 | CAAAGACACCTTCACGAGG       |
| WHO                | NIID.WH-1_Seq_R840   | GACATAGCGAGTGTATGCC       |
| WHO                | WH-NICN-F            | CGTTTGGTGGACCCTCAGAT      |
| WHO                | WH-NICN-P            | CAACTGGCAGTAACCA          |
| WHO                | WH-NICN-R            | CCCCACTGCGTTCTCCATT       |
| WHO                | WuhanCoV-spk1-f      | TTGGCAAAATTCAAGACTCACTTT  |
| WHO                | WuhanCoV-spk2-r      | TGTGGTTCATAAAAATTCCTTTGTG |
| WHO                | nCoV_IP2-12669Fw     | ATGAGCTTAGTCCTGTTG        |

(continued on next page)

(Table S4 continued)

| Name of Set     | Primer/probe         | Sequence 5' → 3'       |
|-----------------|----------------------|------------------------|
| WHO             | nCoV_IP2-12696bProbe | AGATGTCCTTGTGCTGCCGGTA |
| WHO             | nCoV_IP2-12759Rv     | CTCCCTTTGTTGTGTTGT     |
| WHO             | nCoV_IP4-14059Fw     | GGTAACTGGTATGATTTTCG   |
| WHO             | nCoV_IP4-14084Probe  | TCATACAAACCACGCCAGG    |
| WHO             | nCoV_IP4-14146Rv     | CTGGTCAAGGTTAATATAGG   |
| Yip et al. [16] | nsp2f                | ATGCATTTGCATCAGAGGCT   |
| Yip et al. [16] | nsp2r                | TTGTTATAGCGGCCTTCTGT   |

Table S5: Reference melting temperatures and coverages for SARS-CoV-2.

| Set               | Primer/probe   | $T_{\text{ref.}}$ ( $^{\circ}\text{C}$ ) | $C_{\text{strict}}$ (%) | $C_{\text{part.}}$ (%) | $N_{\text{imp}}$ |
|-------------------|----------------|------------------------------------------|-------------------------|------------------------|------------------|
| Bhadra et al. [1] | E-PF           | 62.6                                     | 99.3                    | 99.4                   | 1                |
| Bhadra et al. [1] | E-Probe        | 64.2                                     | 99.3                    | 99.3                   | 1                |
| Bhadra et al. [1] | E-RP           | 61.4                                     | 99.3                    | 99.3                   | 0                |
| Bhadra et al. [1] | M-PF           | 62.2                                     | 99.3                    | 99.3                   | 0                |
| Bhadra et al. [1] | M-Probe        | 61.3                                     | 99.4                    | 99.4                   | 0                |
| Bhadra et al. [1] | M-RP           | 63.3                                     | 98.7                    | 98.7                   | 0                |
| CDC               | 2019-nCoV_N1-F | 62.4                                     | 99.3                    | 99.3                   | 0                |
| CDC               | 2019-nCoV_N1-P | 75.5                                     | 98.4                    | 99.4                   | 223              |
| CDC               | 2019-nCoV_N1-R | 69.0                                     | 99.2                    | 99.4                   | 37               |
| CDC               | 2019-nCoV_N2-F | 61.1                                     | 99.0                    | 99.0                   | 0                |
| CDC               | 2019-nCoV_N2-P | 74.7                                     | 98.9                    | 99.1                   | 32               |
| CDC               | 2019-nCoV_N2-R | 63.3                                     | 99.3                    | 99.3                   | 1                |
| Corman et al. [2] | E_Sarbeco_F    | 65.6                                     | 99.4                    | 99.4                   | 1                |
| Corman et al. [2] | E_Sarbeco_P1   | 78.2                                     | 99.3                    | 99.3                   | 12               |
| Corman et al. [2] | E_Sarbeco_R    | 65.9                                     | 99.3                    | 99.3                   | 5                |
| Corman et al. [2] | N_Sarbeco_F    | 64.6                                     | 99.2                    | 99.2                   | 1                |
| Corman et al. [2] | N_Sarbeco_P    | 71.9                                     | 98.8                    | 99.1                   | 60               |
| Corman et al. [2] | N_Sarbeco_R    | 65.1                                     | 97.6                    | 97.6                   | 1                |
| Corman et al. [2] | RdRp_SARSr-FA  | 69.1                                     | 99.3                    | 99.4                   | 32               |

(continued on next page)

(Table S5, SARS-Cov-2 coverage, continued)

| Set               | Primer/probe    | $T_{ref.}$ (°C) | $C_{strict}$ (%) | $C_{part.}$ (%) | $N_{imp}$ |
|-------------------|-----------------|-----------------|------------------|-----------------|-----------|
| Corman et al. [2] | RdRp_SARSr-FG   | 70.7            | 0.000            | 99.3            | 21522     |
| Corman et al. [2] | RdRp_SARSr-P1-1 | 79.2            | 0.000            | 99.4            | 21540     |
| Corman et al. [2] | RdRp_SARSr-P1-2 | 81.7            | 0.000            | 99.3            | 21521     |
| Corman et al. [2] | RdRp_SARSr-P1-3 | 77.3            | 0.000            | 99.4            | 21540     |
| Corman et al. [2] | RdRp_SARSr-P1-4 | 79.9            | 0.000            | 99.3            | 21521     |
| Corman et al. [2] | RdRp_SARSr-P1-5 | 78.2            | 0.000            | 99.4            | 21538     |
| Corman et al. [2] | RdRp_SARSr-P1-6 | 80.7            | 0.000            | 0.000           | 0         |
| Corman et al. [2] | RdRp_SARSr-P1-7 | 76.2            | 0.000            | 99.4            | 21539     |
| Corman et al. [2] | RdRp_SARSr-P1-8 | 78.8            | 0.000            | 0.0692          | 15        |
| Corman et al. [2] | RdRp_SARSr-P2   | 76.3            | 99.3             | 99.4            | 26        |
| Corman et al. [2] | RdRp_SARSr-R1   | 61.7            | 0.000            | 0.000           | 0         |
| Corman et al. [2] | RdRp_SARSr-R2   | 62.1            | 0.000            | 0.000           | 0         |
| Corman et al. [2] | RdRp_SARSr-R3   | 63.5            | 0.000            | 0.000           | 0         |
| Corman et al. [2] | RdRp_SARSr-R4   | 63.8            | 0.000            | 0.000           | 0         |
| Davda et al. [3]  | MF1             | 56.5            | 98.7             | 98.7            | 0         |
| Davda et al. [3]  | MF2             | 58.6            | 99.4             | 99.4            | 0         |
| Davda et al. [3]  | MR1             | 58.9            | 99.2             | 99.2            | 0         |
| Davda et al. [3]  | MR2             | 60.2            | 99.3             | 99.3            | 0         |
| Davda et al. [3]  | N1F1            | 66.7            | 99.3             | 99.4            | 10        |
| Davda et al. [3]  | N1F2            | 70.3            | 99.0             | 99.1            | 24        |
| Davda et al. [3]  | N1R1            | 62.2            | 99.3             | 99.3            | 0         |

(continued on next page)

(Table S5, SARS-Cov-2 coverage, continued)

| Set                | Primer/probe | $T_{\text{ref.}}$ ( $^{\circ}\text{C}$ ) | $C_{\text{strict}}$ (%) | $C_{\text{part.}}$ (%) | $N_{\text{imp}}$ |
|--------------------|--------------|------------------------------------------|-------------------------|------------------------|------------------|
| Davda et al. [3]   | N1R2         | 68.0                                     | 99.1                    | 99.1                   | 5                |
| Davda et al. [3]   | N2F1         | 60.3                                     | 99.3                    | 99.3                   | 0                |
| Davda et al. [3]   | N2F2         | 57.6                                     | 99.2                    | 99.2                   | 0                |
| Davda et al. [3]   | N2R1         | 59.9                                     | 95.3                    | 95.3                   | 0                |
| Davda et al. [3]   | N2R2         | 57.0                                     | 99.4                    | 99.4                   | 0                |
| Davda et al. [3]   | Orf1abF1     | 69.7                                     | 99.1                    | 99.4                   | 54               |
| Davda et al. [3]   | Orf1abF2     | 63.2                                     | 99.0                    | 99.0                   | 0                |
| Davda et al. [3]   | Orf1abR1     | 67.4                                     | 99.0                    | 99.0                   | 12               |
| Davda et al. [3]   | Orf1abR2     | 61.7                                     | 98.9                    | 98.9                   | 0                |
| Grant et al. [4]   | NgeneProbe   | 79.9                                     | 99.3                    | 99.5                   | 32               |
| Grant et al. [4]   | NgeneTaq1    | 62.4                                     | 97.5                    | 97.5                   | 0                |
| Grant et al. [4]   | NgeneTaq2    | 63.8                                     | 99.2                    | 99.2                   | 0                |
| Hirotsu et al. [5] | NIID-N2-F    | 60.6                                     | 99.2                    | 99.2                   | 0                |
| Hirotsu et al. [5] | NIID-N2-P    | 68.8                                     | 99.4                    | 99.4                   | 7                |
| Hirotsu et al. [5] | NIID-N2-R    | 63.9                                     | 0.000                   | 0.000                  | 0                |
| Lanza et al. [6]   | UFRN_1_F     | 63.7                                     | 99.0                    | 99.1                   | 11               |
| Lanza et al. [6]   | UFRN_1_P     | 75.0                                     | 99.3                    | 99.4                   | 36               |
| Lanza et al. [6]   | UFRN_1_R     | 62.9                                     | 99.3                    | 99.3                   | 0                |
| Lanza et al. [6]   | UFRN_2_F     | 62.2                                     | 99.4                    | 99.4                   | 0                |
| Lanza et al. [6]   | UFRN_2_P     | 69.7                                     | 98.5                    | 98.8                   | 65               |
| Lanza et al. [6]   | UFRN_2_R     | 62.0                                     | 99.1                    | 99.1                   | 0                |

(continued on next page)

(Table S5, SARS-Cov-2 coverage, continued)

| Set              | Primer/probe | $T_{\text{ref.}}$ ( $^{\circ}\text{C}$ ) | $C_{\text{strict}}$ (%) | $C_{\text{part.}}$ (%) | $N_{\text{imp}}$ |
|------------------|--------------|------------------------------------------|-------------------------|------------------------|------------------|
| Lanza et al. [6] | UFRN_3_F     | 62.9                                     | 99.0                    | 99.0                   | 2                |
| Lanza et al. [6] | UFRN_3_P     | 69.1                                     | 99.0                    | 99.1                   | 21               |
| Lanza et al. [6] | UFRN_3_R     | 60.5                                     | 99.0                    | 99.0                   | 0                |
| Lanza et al. [6] | UFRN_4_F     | 62.0                                     | 99.3                    | 99.3                   | 0                |
| Lanza et al. [6] | UFRN_4_P     | 69.0                                     | 99.0                    | 99.5                   | 107              |
| Lanza et al. [6] | UFRN_4_R     | 64.9                                     | 99.3                    | 99.3                   | 2                |
| Lanza et al. [6] | UFRN_5_F     | 62.2                                     | 99.2                    | 99.2                   | 0                |
| Lanza et al. [6] | UFRN_5_P     | 73.0                                     | 98.8                    | 98.9                   | 25               |
| Lanza et al. [6] | UFRN_5_R     | 63.7                                     | 98.9                    | 98.9                   | 0                |
| Lanza et al. [6] | UFRN_6_F     | 63.2                                     | 98.9                    | 98.9                   | 0                |
| Lanza et al. [6] | UFRN_6_P     | 71.3                                     | 99.0                    | 99.2                   | 42               |
| Lanza et al. [6] | UFRN_6_R     | 62.4                                     | 99.2                    | 99.2                   | 0                |
| Lanza et al. [6] | UFRN_7_F     | 62.5                                     | 98.9                    | 98.9                   | 0                |
| Lanza et al. [6] | UFRN_7_P     | 71.7                                     | 99.1                    | 99.2                   | 36               |
| Lanza et al. [6] | UFRN_7_R     | 61.5                                     | 99.2                    | 99.2                   | 0                |
| Lanza et al. [6] | UFRN_8_F     | 61.3                                     | 99.4                    | 99.4                   | 0                |
| Lanza et al. [6] | UFRN_8_P     | 70.5                                     | 99.4                    | 99.4                   | 11               |
| Lanza et al. [6] | UFRN_8_R     | 62.0                                     | 99.4                    | 99.4                   | 0                |
| Lanza et al. [6] | UFRN_9_F     | 60.5                                     | 99.4                    | 99.4                   | 0                |
| Lanza et al. [6] | UFRN_9_P     | 72.6                                     | 99.4                    | 99.5                   | 24               |
| Lanza et al. [6] | UFRN_9_R     | 62.4                                     | 99.2                    | 99.2                   | 0                |

(continued on next page)

(Table S5, SARS-Cov-2 coverage, continued)

| Set                | Primer/probe       | $T_{\text{ref.}}$ (°C) | $C_{\text{strict}}$ (%) | $C_{\text{part.}}$ (%) | $N_{\text{imp}}$ |
|--------------------|--------------------|------------------------|-------------------------|------------------------|------------------|
| Li et al. [7]      | S-1                | 70.4                   | 98.2                    | 98.3                   | 5                |
| Li et al. [7]      | S-2                | 67.5                   | 99.2                    | 99.2                   | 5                |
| Lu et al. [8]      | ORF1a-F            | 64.0                   | 99.4                    | 99.4                   | 0                |
| Lu et al. [8]      | ORF1a-P            | 74.7                   | 98.6                    | 99.3                   | 150              |
| Lu et al. [8]      | ORF1a-R            | 68.8                   | 99.3                    | 99.4                   | 20               |
| Luminex            | China_N_F          | 67.1                   | 64.9                    | 65.1                   | 54               |
| Luminex            | China_N_P          | 63.1                   | 99.2                    | 99.2                   | 0                |
| Luminex            | China_N_R          | 65.6                   | 96.4                    | 96.4                   | 4                |
| Luminex            | China_ORF_F        | 59.4                   | 99.5                    | 99.5                   | 0                |
| Luminex            | China_ORF_P        | 81.0                   | 98.9                    | 99.0                   | 9                |
| Luminex            | China_ORF_R        | 61.5                   | 99.1                    | 99.1                   | 0                |
| Munnink et al. [9] | SARS-CoV-2_1_LEFT  | 67.9                   | 45.9                    | 46.0                   | 8                |
| Munnink et al. [9] | SARS-CoV-2_1_RIGHT | 69.9                   | 97.4                    | 98.9                   | 313              |
| Munnink et al. [9] | SARS-CoV-2_2_LEFT  | 69.4                   | 98.9                    | 99.0                   | 25               |
| Munnink et al. [9] | SARS-CoV-2_2_RIGHT | 67.7                   | 99.4                    | 99.4                   | 6                |
| Munnink et al. [9] | SARS-CoV-2_3_LEFT  | 68.7                   | 99.3                    | 99.3                   | 9                |
| Munnink et al. [9] | SARS-CoV-2_3_RIGHT | 68.4                   | 98.9                    | 99.3                   | 89               |
| Munnink et al. [9] | SARS-CoV-2_4_LEFT  | 66.8                   | 70.0                    | 70.0                   | 1                |
| Munnink et al. [9] | SARS-CoV-2_4_RIGHT | 66.6                   | 99.1                    | 99.2                   | 21               |
| Munnink et al. [9] | SARS-CoV-2_5_LEFT  | 67.7                   | 98.5                    | 98.5                   | 5                |
| Munnink et al. [9] | SARS-CoV-2_5_RIGHT | 68.2                   | 99.0                    | 99.0                   | 9                |

(continued on next page)



(Table S5, SARS-Cov-2 coverage, continued)

| Set                | Primer/probe        | $T_{ref.}$ (°C) | $C_{strict}$ (%) | $C_{part.}$ (%) | $N_{imp}$ |
|--------------------|---------------------|-----------------|------------------|-----------------|-----------|
| Munnink et al. [9] | SARS-CoV-2_6_LEFT   | 73.2            | 98.3             | 99.3            | 233       |
| Munnink et al. [9] | SARS-CoV-2_6_RIGHT  | 66.3            | 99.3             | 99.3            | 1         |
| Munnink et al. [9] | SARS-CoV-2_7_LEFT   | 71.3            | 99.1             | 99.2            | 27        |
| Munnink et al. [9] | SARS-CoV-2_7_RIGHT  | 67.8            | 99.1             | 99.2            | 10        |
| Munnink et al. [9] | SARS-CoV-2_8_LEFT   | 67.2            | 98.9             | 99.0            | 5         |
| Munnink et al. [9] | SARS-CoV-2_8_RIGHT  | 65.9            | 98.1             | 98.3            | 36        |
| Munnink et al. [9] | SARS-CoV-2_9_LEFT   | 72.3            | 99.0             | 99.1            | 25        |
| Munnink et al. [9] | SARS-CoV-2_9_RIGHT  | 69.0            | 98.6             | 98.7            | 22        |
| Munnink et al. [9] | SARS-CoV-2_11_LEFT  | 66.9            | 99.2             | 99.3            | 14        |
| Munnink et al. [9] | SARS-CoV-2_11_RIGHT | 71.3            | 98.0             | 99.3            | 280       |
| Munnink et al. [9] | SARS-CoV-2_12_RIGHT | 67.2            | 99.3             | 99.3            | 4         |
| Munnink et al. [9] | SARS-CoV-2_13_LEFT  | 70.0            | 99.3             | 99.3            | 19        |
| Munnink et al. [9] | SARS-CoV-2_13_RIGHT | 68.2            | 99.1             | 99.4            | 57        |
| Munnink et al. [9] | SARS-CoV-2_14_LEFT  | 72.3            | 99.3             | 99.4            | 6         |
| Munnink et al. [9] | SARS-CoV-2_14_RIGHT | 68.1            | 99.1             | 99.4            | 62        |
| Munnink et al. [9] | SARS-CoV-2_15_LEFT  | 70.9            | 99.2             | 99.3            | 37        |
| Munnink et al. [9] | SARS-CoV-2_15_RIGHT | 67.9            | 99.0             | 99.1            | 26        |
| Munnink et al. [9] | SARS-CoV-2_16_LEFT  | 69.9            | 98.3             | 98.4            | 35        |
| Munnink et al. [9] | SARS-CoV-2_16_RIGHT | 65.4            | 99.3             | 99.3            | 1         |
| Munnink et al. [9] | SARS-CoV-2_17_LEFT  | 66.7            | 99.3             | 99.4            | 22        |
| Munnink et al. [9] | SARS-CoV-2_17_RIGHT | 67.9            | 98.3             | 98.4            | 26        |

(continued on next page)

(Table S5, SARS-Cov-2 coverage, continued)

| Set                | Primer/probe        | $T_{\text{ref.}}$ (°C) | $C_{\text{strict}}$ (%) | $C_{\text{part.}}$ (%) | $N_{\text{imp}}$ |
|--------------------|---------------------|------------------------|-------------------------|------------------------|------------------|
| Munnink et al. [9] | SARS-CoV-2_18_LEFT  | 68.0                   | 99.2                    | 99.3                   | 27               |
| Munnink et al. [9] | SARS-CoV-2_18_RIGHT | 71.0                   | 98.9                    | 99.0                   | 21               |
| Munnink et al. [9] | SARS-CoV-2_19_LEFT  | 69.6                   | 99.4                    | 99.5                   | 31               |
| Munnink et al. [9] | SARS-CoV-2_19_RIGHT | 69.6                   | 99.0                    | 99.2                   | 45               |
| Munnink et al. [9] | SARS-CoV-2_20_LEFT  | 67.0                   | 98.9                    | 98.9                   | 2                |
| Munnink et al. [9] | SARS-CoV-2_21_LEFT  | 72.1                   | 98.5                    | 98.7                   | 32               |
| Munnink et al. [9] | SARS-CoV-2_21_RIGHT | 66.8                   | 99.2                    | 99.2                   | 6                |
| Munnink et al. [9] | SARS-CoV-2_22_LEFT  | 66.6                   | 98.9                    | 98.9                   | 7                |
| Munnink et al. [9] | SARS-CoV-2_22_RIGHT | 67.7                   | 99.4                    | 99.4                   | 1                |
| Munnink et al. [9] | SARS-CoV-2_23_LEFT  | 70.0                   | 83.3                    | 99.4                   | 3496             |
| Munnink et al. [9] | SARS-CoV-2_23_RIGHT | 68.1                   | 99.2                    | 99.3                   | 6                |
| Munnink et al. [9] | SARS-CoV-2_24_LEFT  | 72.0                   | 99.2                    | 99.3                   | 39               |
| Munnink et al. [9] | SARS-CoV-2_24_RIGHT | 67.5                   | 98.4                    | 98.4                   | 0                |
| Munnink et al. [9] | SARS-CoV-2_25_LEFT  | 71.7                   | 99.2                    | 99.3                   | 30               |
| Munnink et al. [9] | SARS-CoV-2_25_RIGHT | 67.5                   | 99.0                    | 99.0                   | 2                |
| Munnink et al. [9] | SARS-CoV-2_26_LEFT  | 70.5                   | 99.0                    | 99.1                   | 8                |
| Munnink et al. [9] | SARS-CoV-2_26_RIGHT | 67.5                   | 99.3                    | 99.3                   | 3                |
| Munnink et al. [9] | SARS-CoV-2_27_LEFT  | 68.0                   | 98.9                    | 98.9                   | 13               |
| Munnink et al. [9] | SARS-CoV-2_27_RIGHT | 68.2                   | 99.2                    | 99.3                   | 19               |
| Munnink et al. [9] | SARS-CoV-2_28_LEFT  | 67.5                   | 99.0                    | 99.1                   | 32               |
| Munnink et al. [9] | SARS-CoV-2_28_RIGHT | 67.4                   | 99.3                    | 99.3                   | 7                |

(continued on next page)

(Table S5, SARS-Cov-2 coverage, continued)

| Set                | Primer/probe        | $T_{ref.}$ (°C) | $C_{strict}$ (%) | $C_{part.}$ (%) | $N_{imp}$ |
|--------------------|---------------------|-----------------|------------------|-----------------|-----------|
| Munnink et al. [9] | SARS-CoV-2_29_LEFT  | 71.6            | 99.2             | 99.5            | 49        |
| Munnink et al. [9] | SARS-CoV-2_29_RIGHT | 69.1            | 97.6             | 97.9            | 53        |
| Munnink et al. [9] | SARS-CoV-2_30_LEFT  | 72.3            | 99.4             | 99.5            | 10        |
| Munnink et al. [9] | SARS-CoV-2_30_RIGHT | 69.1            | 98.2             | 98.6            | 84        |
| Munnink et al. [9] | SARS-CoV-2_31_LEFT  | 68.4            | 99.2             | 99.2            | 3         |
| Munnink et al. [9] | SARS-CoV-2_31_RIGHT | 67.4            | 99.0             | 99.4            | 81        |
| Munnink et al. [9] | SARS-CoV-2_32_LEFT  | 68.1            | 99.4             | 99.4            | 2         |
| Munnink et al. [9] | SARS-CoV-2_32_RIGHT | 67.8            | 99.2             | 99.3            | 14        |
| Munnink et al. [9] | SARS-CoV-2_33_LEFT  | 71.5            | 99.0             | 99.3            | 58        |
| Munnink et al. [9] | SARS-CoV-2_33_RIGHT | 66.9            | 99.3             | 99.3            | 3         |
| Munnink et al. [9] | SARS-CoV-2_34_LEFT  | 68.6            | 99.4             | 99.4            | 2         |
| Munnink et al. [9] | SARS-CoV-2_34_RIGHT | 66.1            | 99.0             | 99.1            | 6         |
| Munnink et al. [9] | SARS-CoV-2_35_LEFT  | 68.7            | 99.3             | 99.3            | 10        |
| Munnink et al. [9] | SARS-CoV-2_35_RIGHT | 68.7            | 99.3             | 99.4            | 9         |
| Munnink et al. [9] | SARS-CoV-2_36_LEFT  | 70.5            | 99.5             | 99.7            | 45        |
| Munnink et al. [9] | SARS-CoV-2_36_RIGHT | 68.0            | 99.3             | 99.3            | 2         |
| Munnink et al. [9] | SARS-CoV-2_37_LEFT  | 68.5            | 98.9             | 99.0            | 9         |
| Munnink et al. [9] | SARS-CoV-2_37_RIGHT | 67.6            | 99.4             | 99.4            | 16        |
| Munnink et al. [9] | SARS-CoV-2_38_LEFT  | 68.5            | 99.3             | 99.4            | 9         |
| Munnink et al. [9] | SARS-CoV-2_38_RIGHT | 67.3            | 99.3             | 99.5            | 51        |
| Munnink et al. [9] | SARS-CoV-2_39_LEFT  | 70.8            | 99.3             | 99.4            | 27        |

(continued on next page)

(Table S5, SARS-Cov-2 coverage, continued)

| Set                | Primer/probe        | $T_{\text{ref.}}$ (°C) | $C_{\text{strict}}$ (%) | $C_{\text{part.}}$ (%) | $N_{\text{imp}}$ |
|--------------------|---------------------|------------------------|-------------------------|------------------------|------------------|
| Munnink et al. [9] | SARS-CoV-2_39_RIGHT | 67.6                   | 99.2                    | 99.3                   | 11               |
| Munnink et al. [9] | SARS-CoV-2_40_LEFT  | 70.7                   | 99.1                    | 99.4                   | 52               |
| Munnink et al. [9] | SARS-CoV-2_40_RIGHT | 67.9                   | 99.0                    | 99.1                   | 10               |
| Munnink et al. [9] | SARS-CoV-2_41_LEFT  | 70.2                   | 99.2                    | 99.3                   | 14               |
| Munnink et al. [9] | SARS-CoV-2_41_RIGHT | 68.4                   | 99.3                    | 99.4                   | 2                |
| Munnink et al. [9] | SARS-CoV-2_42_LEFT  | 72.3                   | 99.2                    | 99.3                   | 20               |
| Munnink et al. [9] | SARS-CoV-2_42_RIGHT | 68.8                   | 98.9                    | 99.4                   | 102              |
| Munnink et al. [9] | SARS-CoV-2_43_LEFT  | 69.1                   | 99.4                    | 99.5                   | 9                |
| Munnink et al. [9] | SARS-CoV-2_43_RIGHT | 66.7                   | 99.3                    | 99.3                   | 4                |
| Munnink et al. [9] | SARS-CoV-2_44_LEFT  | 72.3                   | 99.3                    | 99.4                   | 17               |
| Munnink et al. [9] | SARS-CoV-2_44_RIGHT | 65.7                   | 99.5                    | 99.5                   | 3                |
| Munnink et al. [9] | SARS-CoV-2_45_LEFT  | 69.7                   | 98.9                    | 98.9                   | 7                |
| Munnink et al. [9] | SARS-CoV-2_45_RIGHT | 65.0                   | 99.3                    | 99.3                   | 0                |
| Munnink et al. [9] | SARS-CoV-2_46_LEFT  | 69.3                   | 99.3                    | 99.4                   | 17               |
| Munnink et al. [9] | SARS-CoV-2_46_RIGHT | 67.3                   | 99.3                    | 99.3                   | 0                |
| Munnink et al. [9] | SARS-CoV-2_47_LEFT  | 64.8                   | 99.4                    | 99.4                   | 0                |
| Munnink et al. [9] | SARS-CoV-2_47_RIGHT | 67.9                   | 99.3                    | 99.5                   | 24               |
| Munnink et al. [9] | SARS-CoV-2_48_LEFT  | 66.7                   | 98.8                    | 98.9                   | 29               |
| Munnink et al. [9] | SARS-CoV-2_48_RIGHT | 67.3                   | 98.2                    | 98.3                   | 1                |
| Munnink et al. [9] | SARS-CoV-2_49_LEFT  | 71.4                   | 99.2                    | 99.4                   | 50               |
| Munnink et al. [9] | SARS-CoV-2_49_RIGHT | 66.8                   | 99.2                    | 99.3                   | 16               |

(continued on next page)

(Table S5, SARS-Cov-2 coverage, continued)

| Set                | Primer/probe        | $T_{\text{ref.}}$ (°C) | $C_{\text{strict}}$ (%) | $C_{\text{part.}}$ (%) | $N_{\text{imp}}$ |
|--------------------|---------------------|------------------------|-------------------------|------------------------|------------------|
| Munnink et al. [9] | SARS-CoV-2_50_LEFT  | 73.8                   | 99.3                    | 99.4                   | 36               |
| Munnink et al. [9] | SARS-CoV-2_50_RIGHT | 68.1                   | 99.2                    | 99.3                   | 16               |
| Munnink et al. [9] | SARS-CoV-2_51_LEFT  | 68.9                   | 99.2                    | 99.3                   | 17               |
| Munnink et al. [9] | SARS-CoV-2_51_RIGHT | 67.8                   | 99.5                    | 99.5                   | 1                |
| Munnink et al. [9] | SARS-CoV-2_52_LEFT  | 71.3                   | 99.2                    | 99.3                   | 9                |
| Munnink et al. [9] | SARS-CoV-2_52_RIGHT | 68.5                   | 99.0                    | 99.0                   | 6                |
| Munnink et al. [9] | SARS-CoV-2_53_RIGHT | 67.3                   | 99.3                    | 99.4                   | 19               |
| Munnink et al. [9] | SARS-CoV-2_54_LEFT  | 72.2                   | 98.9                    | 99.1                   | 37               |
| Munnink et al. [9] | SARS-CoV-2_54_RIGHT | 69.3                   | 99.2                    | 99.3                   | 38               |
| Munnink et al. [9] | SARS-CoV-2_55_LEFT  | 70.0                   | 99.1                    | 99.3                   | 40               |
| Munnink et al. [9] | SARS-CoV-2_55_RIGHT | 68.1                   | 99.4                    | 99.5                   | 7                |
| Munnink et al. [9] | SARS-CoV-2_56_LEFT  | 68.9                   | 99.3                    | 99.4                   | 17               |
| Munnink et al. [9] | SARS-CoV-2_56_RIGHT | 68.4                   | 99.1                    | 99.4                   | 48               |
| Munnink et al. [9] | SARS-CoV-2_57_LEFT  | 74.2                   | 99.3                    | 99.4                   | 33               |
| Munnink et al. [9] | SARS-CoV-2_57_RIGHT | 66.7                   | 99.0                    | 99.1                   | 23               |
| Munnink et al. [9] | SARS-CoV-2_58_LEFT  | 73.8                   | 99.1                    | 99.2                   | 22               |
| Munnink et al. [9] | SARS-CoV-2_58_RIGHT | 67.9                   | 98.7                    | 98.7                   | 2                |
| Munnink et al. [9] | SARS-CoV-2_59_LEFT  | 68.9                   | 98.1                    | 98.2                   | 13               |
| Munnink et al. [9] | SARS-CoV-2_59_RIGHT | 67.0                   | 99.1                    | 99.1                   | 3                |
| Munnink et al. [9] | SARS-CoV-2_60_LEFT  | 71.0                   | 98.2                    | 99.4                   | 250              |
| Munnink et al. [9] | SARS-CoV-2_60_RIGHT | 70.4                   | 99.1                    | 99.3                   | 26               |

(continued on next page)

(Table S5, SARS-Cov-2 coverage, continued)

| Set                | Primer/probe        | $T_{ref.}$ (°C) | $C_{strict}$ (%) | $C_{part.}$ (%) | $N_{imp}$ |
|--------------------|---------------------|-----------------|------------------|-----------------|-----------|
| Munnink et al. [9] | SARS-CoV-2_61_LEFT  | 67.2            | 98.9             | 99.0            | 9         |
| Munnink et al. [9] | SARS-CoV-2_61_RIGHT | 67.3            | 98.8             | 98.8            | 16        |
| Munnink et al. [9] | SARS-CoV-2_62_LEFT  | 74.0            | 99.1             | 99.1            | 6         |
| Munnink et al. [9] | SARS-CoV-2_62_RIGHT | 70.0            | 99.3             | 99.3            | 1         |
| Munnink et al. [9] | SARS-CoV-2_63_LEFT  | 69.5            | 99.1             | 99.1            | 4         |
| Munnink et al. [9] | SARS-CoV-2_63_RIGHT | 69.1            | 99.0             | 99.0            | 10        |
| Munnink et al. [9] | SARS-CoV-2_64_LEFT  | 74.9            | 99.3             | 99.4            | 27        |
| Munnink et al. [9] | SARS-CoV-2_64_RIGHT | 72.4            | 98.4             | 98.7            | 48        |
| Munnink et al. [9] | SARS-CoV-2_65_RIGHT | 66.8            | 98.9             | 99.0            | 19        |
| Munnink et al. [9] | SARS-CoV-2_66_RIGHT | 66.6            | 98.9             | 98.9            | 4         |
| Munnink et al. [9] | SARS-CoV-2_67_LEFT  | 71.8            | 99.0             | 99.2            | 56        |
| Munnink et al. [9] | SARS-CoV-2_67_RIGHT | 67.2            | 95.6             | 95.6            | 8         |
| Munnink et al. [9] | SARS-CoV-2_68_LEFT  | 70.1            | 99.0             | 99.3            | 50        |
| Munnink et al. [9] | SARS-CoV-2_68_RIGHT | 69.7            | 99.3             | 99.3            | 20        |
| Munnink et al. [9] | SARS-CoV-2_69_LEFT  | 68.3            | 99.2             | 99.3            | 16        |
| Munnink et al. [9] | SARS-CoV-2_69_RIGHT | 66.0            | 98.7             | 98.7            | 0         |
| Munnink et al. [9] | SARS-CoV-2_70_LEFT  | 67.2            | 83.0             | 83.0            | 1         |
| Munnink et al. [9] | SARS-CoV-2_70_RIGHT | 68.6            | 99.4             | 99.4            | 4         |
| Munnink et al. [9] | SARS-CoV-2_71_LEFT  | 66.9            | 99.4             | 99.4            | 1         |
| Munnink et al. [9] | SARS-CoV-2_71_RIGHT | 69.3            | 99.2             | 99.2            | 5         |
| Munnink et al. [9] | SARS-CoV-2_72_LEFT  | 67.9            | 98.6             | 98.6            | 6         |

(continued on next page)

(Table S5, SARS-Cov-2 coverage, continued)

| Set                | Primer/probe        | $T_{\text{ref.}}$ (°C) | $C_{\text{strict}}$ (%) | $C_{\text{part.}}$ (%) | $N_{\text{imp}}$ |
|--------------------|---------------------|------------------------|-------------------------|------------------------|------------------|
| Munnink et al. [9] | SARS-CoV-2_72_RIGHT | 67.1                   | 99.1                    | 99.1                   | 2                |
| Munnink et al. [9] | SARS-CoV-2_73_LEFT  | 69.6                   | 99.2                    | 99.3                   | 17               |
| Munnink et al. [9] | SARS-CoV-2_73_RIGHT | 66.3                   | 99.3                    | 99.4                   | 3                |
| Munnink et al. [9] | SARS-CoV-2_74_LEFT  | 68.7                   | 99.2                    | 99.3                   | 7                |
| Munnink et al. [9] | SARS-CoV-2_74_RIGHT | 64.4                   | 98.7                    | 98.7                   | 1                |
| Munnink et al. [9] | SARS-CoV-2_75_LEFT  | 68.9                   | 99.5                    | 99.5                   | 3                |
| Munnink et al. [9] | SARS-CoV-2_75_RIGHT | 69.8                   | 99.2                    | 99.3                   | 23               |
| Munnink et al. [9] | SARS-CoV-2_76_LEFT  | 70.7                   | 99.4                    | 99.5                   | 17               |
| Munnink et al. [9] | SARS-CoV-2_76_RIGHT | 68.4                   | 60.4                    | 60.5                   | 16               |
| Munnink et al. [9] | SARS-CoV-2_77_LEFT  | 68.8                   | 98.2                    | 99.3                   | 251              |
| Munnink et al. [9] | SARS-CoV-2_77_RIGHT | 67.0                   | 97.2                    | 97.6                   | 89               |
| Munnink et al. [9] | SARS-CoV-2_78_LEFT  | 69.3                   | 98.7                    | 99.1                   | 86               |
| Munnink et al. [9] | SARS-CoV-2_78_RIGHT | 66.8                   | 99.3                    | 99.4                   | 5                |
| Munnink et al. [9] | SARS-CoV-2_79_LEFT  | 68.4                   | 99.0                    | 99.0                   | 17               |
| Munnink et al. [9] | SARS-CoV-2_79_RIGHT | 68.7                   | 98.7                    | 99.0                   | 66               |
| Munnink et al. [9] | SARS-CoV-2_80_LEFT  | 68.9                   | 99.1                    | 99.3                   | 36               |
| Munnink et al. [9] | SARS-CoV-2_80_RIGHT | 67.1                   | 99.4                    | 99.4                   | 1                |
| Munnink et al. [9] | SARS-CoV-2_81_LEFT  | 65.9                   | 97.8                    | 99.3                   | 324              |
| Munnink et al. [9] | SARS-CoV-2_81_RIGHT | 66.9                   | 99.3                    | 99.3                   | 11               |
| Munnink et al. [9] | SARS-CoV-2_82_LEFT  | 68.9                   | 99.4                    | 99.4                   | 0                |
| Munnink et al. [9] | SARS-CoV-2_82_RIGHT | 68.7                   | 99.1                    | 99.3                   | 31               |

(continued on next page)

(Table S5, SARS-Cov-2 coverage, continued)

| Set                | Primer/probe        | $T_{\text{ref.}}$ (°C) | $C_{\text{strict}}$ (%) | $C_{\text{part.}}$ (%) | $N_{\text{imp}}$ |
|--------------------|---------------------|------------------------|-------------------------|------------------------|------------------|
| Munnink et al. [9] | SARS-CoV-2_83_LEFT  | 70.0                   | 99.3                    | 99.4                   | 21               |
| Munnink et al. [9] | SARS-CoV-2_83_RIGHT | 65.7                   | 99.0                    | 99.0                   | 4                |
| Munnink et al. [9] | SARS-CoV-2_84_LEFT  | 72.3                   | 98.4                    | 98.7                   | 69               |
| Munnink et al. [9] | SARS-CoV-2_84_RIGHT | 64.6                   | 99.0                    | 99.0                   | 0                |
| Munnink et al. [9] | SARS-CoV-2_85_LEFT  | 69.8                   | 97.5                    | 99.1                   | 340              |
| Munnink et al. [9] | SARS-CoV-2_85_RIGHT | 67.8                   | 99.3                    | 99.4                   | 15               |
| Munnink et al. [9] | SARS-CoV-2_86_LEFT  | 67.0                   | 99.4                    | 99.5                   | 11               |
| Munnink et al. [9] | SARS-CoV-2_86_RIGHT | 68.3                   | 97.7                    | 98.7                   | 217              |
| Munnink et al. [9] | SARS-CoV-2_87_LEFT  | 69.1                   | 99.0                    | 99.4                   | 77               |
| Munnink et al. [9] | SARS-CoV-2_87_RIGHT | 69.8                   | 99.2                    | 99.3                   | 20               |
| Munnink et al. [9] | SARS-CoV-2_88_LEFT  | 68.4                   | 99.2                    | 99.2                   | 10               |
| Munnink et al. [9] | SARS-CoV-2_88_RIGHT | 68.5                   | 97.4                    | 98.3                   | 182              |
| Munnink et al. [9] | SARS-CoV-2_89_LEFT  | 66.9                   | 98.3                    | 98.6                   | 60               |
| Munnink et al. [9] | SARS-CoV-2_89_RIGHT | 68.3                   | 64.7                    | 64.9                   | 32               |
| Nalla et al. [10]  | nCoV_2019-F         | 66.3                   | 99.4                    | 99.4                   | 1                |
| Nalla et al. [10]  | nCoV_2019-P1        | 51.8                   | 99.5                    | 99.5                   | 0                |
| Nalla et al. [10]  | nCoV_2019-P2        | 54.8                   | 0.000                   | 0.000                  | 0                |
| Nalla et al. [10]  | nCoV_2019-R         | 68.0                   | 99.5                    | 99.5                   | 1                |
| Niu et al. [11]    | E-F                 | 59.2                   | 99.1                    | 99.1                   | 0                |
| Niu et al. [11]    | E-P                 | 84.2                   | 99.2                    | 99.3                   | 13               |
| Niu et al. [11]    | E-R                 | 57.6                   | 99.3                    | 99.3                   | 0                |

(continued on next page)



(Table S5, SARS-Cov-2 coverage, continued)

| Set              | Primer/probe             | $T_{ref.}$ (°C) | $C_{strict}$ (%) | $C_{part.}$ (%) | $N_{imp}$ |
|------------------|--------------------------|-----------------|------------------|-----------------|-----------|
| Niu et al. [11]  | RdRp-F                   | 64.6            | 0.000            | 0.000           | 0         |
| Niu et al. [11]  | RdRp-P                   | 60.8            | 99.4             | 99.4            | 0         |
| Niu et al. [11]  | RdRp-R                   | 68.4            | 0.000            | 0.000           | 0         |
| Park et al. [12] | SARS-CoV-2_IBS_E2-F      | 65.2            | 99.3             | 99.3            | 1         |
| Park et al. [12] | SARS-CoV-2_IBS_E2-R      | 61.3            | 99.3             | 99.3            | 0         |
| Park et al. [12] | SARS-CoV-2_IBS_N1-F      | 63.3            | 99.1             | 99.1            | 0         |
| Park et al. [12] | SARS-CoV-2_IBS_N1-R      | 63.9            | 98.0             | 98.1            | 11        |
| Park et al. [12] | SARS-CoV-2_IBS_RdRP2-F   | 63.8            | 99.3             | 99.3            | 2         |
| Park et al. [12] | SARS-CoV-2_IBS_RdRP2-R   | 64.5            | 99.4             | 99.4            | 0         |
| Park et al. [12] | SARS-CoV-2_IBS_S2-F      | 63.7            | 94.9             | 94.9            | 0         |
| Park et al. [12] | SARS-CoV-2_IBS_S2-R      | 61.6            | 95.6             | 95.6            | 0         |
| Park et al. [12] | SARS-CoV-2_IBS_m_N1-F    | 60.8            | 99.3             | 99.3            | 0         |
| Park et al. [12] | SARS-CoV-2_IBS_m_N1-R    | 65.4            | 99.3             | 99.4            | 5         |
| Park et al. [12] | SARS-CoV-2_IBS_m_N2-F    | 60.3            | 98.8             | 98.8            | 0         |
| Park et al. [12] | SARS-CoV-2_IBS_m_N2-R    | 62.4            | 98.7             | 98.7            | 0         |
| Park et al. [12] | SARS-CoV-2_IBS_m_RdRP1-F | 62.7            | 99.3             | 99.3            | 6         |
| Park et al. [12] | SARS-CoV-2_IBS_m_RdRP1-R | 60.8            | 99.3             | 99.3            | 0         |
| Park et al. [12] | SARS-CoV-2_IBS_m_RdRP2-F | 62.9            | 99.3             | 99.3            | 0         |
| Park et al. [12] | SARS-CoV-2_IBS_m_RdRP2-R | 62.2            | 98.8             | 98.8            | 0         |
| Park et al. [12] | SARS-CoV-2_IBS_m_S1-F    | 62.5            | 99.3             | 99.3            | 0         |
| Park et al. [12] | SARS-CoV-2_IBS_m_S1-R    | 59.3            | 99.2             | 99.2            | 0         |

(continued on next page)

(Table S5, SARS-Cov-2 coverage, continued)

| Set                | Primer/probe          | $T_{ref.}$ (°C) | $C_{strict}$ (%) | $C_{part.}$ (%) | $N_{imp}$ |
|--------------------|-----------------------|-----------------|------------------|-----------------|-----------|
| Park et al. [12]   | SARS-CoV-2_IBS_m_S2-F | 61.4            | 99.3             | 99.3            | 0         |
| Park et al. [12]   | SARS-CoV-2_IBS_m_S2-R | 60.3            | 99.5             | 99.5            | 0         |
| Rahman et al. [13] | M-F                   | 68.9            | 99.2             | 99.2            | 1         |
| Rahman et al. [13] | M-P                   | 70.9            | 98.7             | 99.4            | 140       |
| Rahman et al. [13] | M-R                   | 66.3            | 99.4             | 99.4            | 3         |
| Rahman et al. [13] | ORF1b-F               | 65.5            | 98.7             | 98.7            | 3         |
| Rahman et al. [13] | ORF1b-P               | 76.1            | 97.9             | 98.7            | 179       |
| Rahman et al. [13] | ORF1b-R               | 64.2            | 97.6             | 97.6            | 0         |
| Toptan et al. [14] | M-475-F               | 64.8            | 99.2             | 99.2            | 0         |
| Toptan et al. [14] | M-507-P               | 63.5            | 98.8             | 98.8            | 2         |
| Toptan et al. [14] | M-574-R               | 65.4            | 99.4             | 99.4            | 8         |
| Toptan et al. [14] | S-1850-F              | 64.6            | 99.3             | 99.3            | 1         |
| Toptan et al. [14] | S-1884-P              | 62.2            | 99.2             | 99.2            | 0         |
| Toptan et al. [14] | S-1949-R              | 63.0            | 99.5             | 99.5            | 0         |
| Vogels et al. [15] | HKU-N-F               | 58.6            | 99.1             | 99.1            | 0         |
| Vogels et al. [15] | HKU-N-P               | 63.0            | 98.8             | 98.8            | 0         |
| Vogels et al. [15] | HKU-N-R               | 60.3            | 98.9             | 98.9            | 0         |
| Vogels et al. [15] | HKU-ORF1-F1           | 61.7            | 0.000            | 0.000           | 0         |
| Vogels et al. [15] | HKU-ORF1-F2           | 64.6            | 0.000            | 0.000           | 0         |
| Vogels et al. [15] | HKU-ORF1-F3           | 58.7            | 99.2             | 99.2            | 0         |
| Vogels et al. [15] | HKU-ORF1-F4           | 61.7            | 0.000            | 0.000           | 0         |

(continued on next page)

(Table S5, SARS-Cov-2 coverage, continued)

| Set                | Primer/probe         | $T_{\text{ref.}}$ (°C) | $C_{\text{strict}}$ (%) | $C_{\text{part.}}$ (%) | $N_{\text{imp}}$ |
|--------------------|----------------------|------------------------|-------------------------|------------------------|------------------|
| Vogels et al. [15] | HKU-ORF1-P1          | 64.5                   | 99.3                    | 99.3                   | 4                |
| Vogels et al. [15] | HKU-ORF1-P2          | 63.6                   | 0.0462                  | 0.0462                 | 0                |
| Vogels et al. [15] | HKU-ORF1-R1          | 61.7                   | 99.1                    | 99.1                   | 0                |
| Vogels et al. [15] | HKU-ORF1-R2          | 65.5                   | 0.000                   | 0.000                  | 0                |
| WHO                | NIID_WH-1_F24381     | 61.2                   | 98.6                    | 98.6                   | 0                |
| WHO                | NIID_WH-1_F501       | 70.3                   | 97.8                    | 99.1                   | 291              |
| WHO                | NIID_WH-1_F509       | 63.3                   | 99.0                    | 99.0                   | 2                |
| WHO                | NIID_WH-1_R24873     | 61.5                   | 99.3                    | 99.3                   | 0                |
| WHO                | NIID_WH-1_R854       | 61.7                   | 98.0                    | 98.0                   | 0                |
| WHO                | NIID_WH-1_R913       | 69.2                   | 99.2                    | 99.4                   | 39               |
| WHO                | NIID_WH-1_Seq_F24383 | 60.4                   | 98.6                    | 98.6                   | 0                |
| WHO                | NIID_WH-1_Seq_F519   | 58.8                   | 97.9                    | 97.9                   | 0                |
| WHO                | NIID_WH-1_Seq_R24865 | 60.1                   | 99.3                    | 99.3                   | 0                |
| WHO                | NIID_WH-1_Seq_R840   | 60.2                   | 99.0                    | 99.0                   | 0                |
| WHO                | WH-NICN-F            | 64.4                   | 99.2                    | 99.2                   | 0                |
| WHO                | WH-NICN-P            | 51.3                   | 99.4                    | 99.4                   | 0                |
| WHO                | WH-NICN-R            | 64.1                   | 99.0                    | 99.0                   | 2                |
| WHO                | WuhanCoV-spk1-f      | 65.4                   | 98.9                    | 98.9                   | 6                |
| WHO                | WuhanCoV-spk2-r      | 64.6                   | 99.3                    | 99.3                   | 0                |
| WHO                | nCoV_IP2-12669Fw     | 54.3                   | 99.4                    | 99.4                   | 0                |
| WHO                | nCoV_IP2-12696bProbe | 67.0                   | 99.4                    | 99.5                   | 6                |

(continued on next page)

(Table S5, SARS-Cov-2 coverage, continued)

| Set             | Primer/probe        | $T_{\text{ref.}}$ ( $^{\circ}\text{C}$ ) | $C_{\text{strict}}$ (%) | $C_{\text{part.}}$ (%) | $N_{\text{imp}}$ |
|-----------------|---------------------|------------------------------------------|-------------------------|------------------------|------------------|
| WHO             | nCoV_IP2-12759Rv    | 53.7                                     | 99.2                    | 99.2                   | 0                |
| WHO             | nCoV_IP4-14059Fw    | 54.8                                     | 99.4                    | 99.4                   | 0                |
| WHO             | nCoV_IP4-14084Probe | 61.3                                     | 99.4                    | 99.4                   | 0                |
| WHO             | nCoV_IP4-14146Rv    | 54.8                                     | 99.2                    | 99.2                   | 0                |
| Yip et al. [16] | nsp2f               | 63.4                                     | 99.2                    | 99.3                   | 2                |
| Yip et al. [16] | nsp2r               | 61.4                                     | 99.1                    | 99.1                   | 0                |

Table S6: Primers and probes, and their respective coverages for SARS-CoV-1 genomes.

| Set               | Primer/probe   | $T_{\text{ref.}}$ ( $^{\circ}\text{C}$ ) | $C_{\text{strict}}$ (%) | $C_{\text{part.}}$ (%) | $N_{\text{imp}}$ |
|-------------------|----------------|------------------------------------------|-------------------------|------------------------|------------------|
| Bhadra et al. [1] | E-PF           | 62.6                                     | 0.000                   | 0.000                  | 0                |
| Bhadra et al. [1] | E-Probe        | 64.2                                     | 100.                    | 100.                   | 0                |
| Bhadra et al. [1] | E-RP           | 61.4                                     | 100.                    | 100.                   | 0                |
| Bhadra et al. [1] | M-PF           | 62.2                                     | 0.000                   | 0.000                  | 0                |
| Bhadra et al. [1] | M-Probe        | 61.3                                     | 0.000                   | 0.000                  | 0                |
| Bhadra et al. [1] | M-RP           | 63.3                                     | 100.                    | 100.                   | 0                |
| CDC               | 2019-nCoV_N1-F | 62.4                                     | 0.000                   | 0.000                  | 0                |
| CDC               | 2019-nCoV_N1-P | 75.5                                     | 0.000                   | 0.000                  | 0                |
| CDC               | 2019-nCoV_N1-R | 69.0                                     | 0.000                   | 0.000                  | 0                |
| CDC               | 2019-nCoV_N2-F | 61.1                                     | 80.0                    | 80.0                   | 0                |
| CDC               | 2019-nCoV_N2-P | 74.7                                     | 0.000                   | 0.000                  | 0                |
| CDC               | 2019-nCoV_N2-R | 63.3                                     | 0.000                   | 0.000                  | 0                |
| Corman et al. [2] | E_Sarbeco_F    | 65.6                                     | 100.                    | 100.                   | 0                |
| Corman et al. [2] | E_Sarbeco_P1   | 78.2                                     | 100.                    | 100.                   | 0                |
| Corman et al. [2] | E_Sarbeco_R    | 65.9                                     | 100.                    | 100.                   | 0                |
| Corman et al. [2] | N_Sarbeco_F    | 64.6                                     | 90.0                    | 90.0                   | 0                |
| Corman et al. [2] | N_Sarbeco_P    | 71.9                                     | 100.                    | 100.                   | 0                |
| Corman et al. [2] | N_Sarbeco_R    | 65.1                                     | 0.000                   | 100.                   | 10               |
| Corman et al. [2] | RdRp_SARSr-FA  | 69.1                                     | 0.000                   | 90.0                   | 9                |

(continued on next page)

(Table S6, SARS-CoV-1 coverage, continued)

| Set               | Primer/probe    | $T_{ref.}$ (°C) | $C_{strict}$ (%) | $C_{part.}$ (%) | $N_{imp}$ |
|-------------------|-----------------|-----------------|------------------|-----------------|-----------|
| Corman et al. [2] | RdRp_SARSr-FG   | 70.7            | 90.0             | 90.0            | 0         |
| Corman et al. [2] | RdRp_SARSr-P1-1 | 79.2            | 0.000            | 100.            | 10        |
| Corman et al. [2] | RdRp_SARSr-P1-2 | 81.7            | 0.000            | 100.            | 10        |
| Corman et al. [2] | RdRp_SARSr-P1-3 | 77.3            | 10.0             | 100.            | 9         |
| Corman et al. [2] | RdRp_SARSr-P1-4 | 79.9            | 90.0             | 100.            | 1         |
| Corman et al. [2] | RdRp_SARSr-P1-5 | 78.2            | 0.000            | 100.            | 10        |
| Corman et al. [2] | RdRp_SARSr-P1-6 | 80.7            | 0.000            | 100.            | 10        |
| Corman et al. [2] | RdRp_SARSr-P1-7 | 76.2            | 0.000            | 100.            | 10        |
| Corman et al. [2] | RdRp_SARSr-P1-8 | 78.8            | 0.000            | 100.            | 10        |
| Corman et al. [2] | RdRp_SARSr-P2   | 76.3            | 0.000            | 10.0            | 1         |
| Corman et al. [2] | RdRp_SARSr-R1   | 61.7            | 0.000            | 0.000           | 0         |
| Corman et al. [2] | RdRp_SARSr-R2   | 62.1            | 90.0             | 90.0            | 0         |
| Corman et al. [2] | RdRp_SARSr-R3   | 63.5            | 0.000            | 0.000           | 0         |
| Corman et al. [2] | RdRp_SARSr-R4   | 63.8            | 0.000            | 0.000           | 0         |
| Davda et al. [3]  | MF1             | 56.5            | 0.000            | 0.000           | 0         |
| Davda et al. [3]  | MF2             | 58.6            | 0.000            | 0.000           | 0         |
| Davda et al. [3]  | MR1             | 58.9            | 0.000            | 0.000           | 0         |
| Davda et al. [3]  | MR2             | 60.2            | 0.000            | 0.000           | 0         |
| Davda et al. [3]  | N1F1            | 66.7            | 0.000            | 0.000           | 0         |
| Davda et al. [3]  | N1F2            | 70.3            | 80.0             | 90.0            | 1         |
| Davda et al. [3]  | N1R1            | 62.2            | 0.000            | 0.000           | 0         |

(continued on next page)

(Table S6, SARS-CoV-1 coverage, continued)

| Set                | Primer/probe | $T_{ref.}$ (°C) | $C_{strict}$ (%) | $C_{part.}$ (%) | $N_{imp}$ |
|--------------------|--------------|-----------------|------------------|-----------------|-----------|
| Davda et al. [3]   | N1R2         | 68.0            | 0.000            | 0.000           | 0         |
| Davda et al. [3]   | N2F1         | 60.3            | 0.000            | 0.000           | 0         |
| Davda et al. [3]   | N2F2         | 57.6            | 0.000            | 0.000           | 0         |
| Davda et al. [3]   | N2R1         | 59.9            | 0.000            | 0.000           | 0         |
| Davda et al. [3]   | N2R2         | 57.0            | 0.000            | 0.000           | 0         |
| Davda et al. [3]   | Orf1abF1     | 69.7            | 0.000            | 0.000           | 0         |
| Davda et al. [3]   | Orf1abF2     | 63.2            | 0.000            | 0.000           | 0         |
| Davda et al. [3]   | Orf1abR1     | 67.4            | 0.000            | 0.000           | 0         |
| Davda et al. [3]   | Orf1abR2     | 61.7            | 0.000            | 0.000           | 0         |
| Grant et al. [4]   | NgeneProbe   | 79.9            | 90.0             | 100.            | 1         |
| Grant et al. [4]   | NgeneTaq1    | 62.4            | 100.             | 100.            | 0         |
| Grant et al. [4]   | NgeneTaq2    | 63.8            | 0.000            | 0.000           | 0         |
| Hirotsu et al. [5] | NIID-N2-F    | 60.6            | 0.000            | 0.000           | 0         |
| Hirotsu et al. [5] | NIID-N2-P    | 68.8            | 0.000            | 0.000           | 0         |
| Hirotsu et al. [5] | NIID-N2-R    | 63.9            | 0.000            | 0.000           | 0         |
| Lanza et al. [6]   | UFRN_1_F     | 63.7            | 0.000            | 0.000           | 0         |
| Lanza et al. [6]   | UFRN_1_P     | 75.0            | 0.000            | 0.000           | 0         |
| Lanza et al. [6]   | UFRN_1_R     | 62.9            | 0.000            | 0.000           | 0         |
| Lanza et al. [6]   | UFRN_2_F     | 62.2            | 0.000            | 0.000           | 0         |
| Lanza et al. [6]   | UFRN_2_P     | 69.7            | 0.000            | 0.000           | 0         |
| Lanza et al. [6]   | UFRN_2_R     | 62.0            | 0.000            | 0.000           | 0         |

(continued on next page)

(Table S6, SARS-CoV-1 coverage, continued)

| Set              | Primer/probe | $T_{\text{ref.}}$ (°C) | $C_{\text{strict}}$ (%) | $C_{\text{part.}}$ (%) | $N_{\text{imp}}$ |
|------------------|--------------|------------------------|-------------------------|------------------------|------------------|
| Lanza et al. [6] | UFRN_3_F     | 62.9                   | 0.000                   | 0.000                  | 0                |
| Lanza et al. [6] | UFRN_3_P     | 69.1                   | 0.000                   | 0.000                  | 0                |
| Lanza et al. [6] | UFRN_3_R     | 60.5                   | 0.000                   | 0.000                  | 0                |
| Lanza et al. [6] | UFRN_4_F     | 62.0                   | 0.000                   | 0.000                  | 0                |
| Lanza et al. [6] | UFRN_4_P     | 69.0                   | 0.000                   | 0.000                  | 0                |
| Lanza et al. [6] | UFRN_4_R     | 64.9                   | 0.000                   | 0.000                  | 0                |
| Lanza et al. [6] | UFRN_5_F     | 62.2                   | 0.000                   | 0.000                  | 0                |
| Lanza et al. [6] | UFRN_5_P     | 73.0                   | 0.000                   | 90.0                   | 9                |
| Lanza et al. [6] | UFRN_5_R     | 63.7                   | 0.000                   | 0.000                  | 0                |
| Lanza et al. [6] | UFRN_6_F     | 63.2                   | 0.000                   | 0.000                  | 0                |
| Lanza et al. [6] | UFRN_6_P     | 71.3                   | 0.000                   | 90.0                   | 9                |
| Lanza et al. [6] | UFRN_6_R     | 62.4                   | 0.000                   | 0.000                  | 0                |
| Lanza et al. [6] | UFRN_7_F     | 62.5                   | 0.000                   | 0.000                  | 0                |
| Lanza et al. [6] | UFRN_7_P     | 71.7                   | 0.000                   | 90.0                   | 9                |
| Lanza et al. [6] | UFRN_7_R     | 61.5                   | 0.000                   | 0.000                  | 0                |
| Lanza et al. [6] | UFRN_8_F     | 61.3                   | 0.000                   | 0.000                  | 0                |
| Lanza et al. [6] | UFRN_8_P     | 70.5                   | 0.000                   | 0.000                  | 0                |
| Lanza et al. [6] | UFRN_8_R     | 62.0                   | 0.000                   | 0.000                  | 0                |
| Lanza et al. [6] | UFRN_9_F     | 60.5                   | 0.000                   | 0.000                  | 0                |
| Lanza et al. [6] | UFRN_9_P     | 72.6                   | 0.000                   | 0.000                  | 0                |
| Lanza et al. [6] | UFRN_9_R     | 62.4                   | 0.000                   | 0.000                  | 0                |

(continued on next page)



(Table S6, SARS-CoV-1 coverage, continued)

| Set                | Primer/probe       | $T_{\text{ref.}}$ ( $^{\circ}\text{C}$ ) | $C_{\text{strict}}$ (%) | $C_{\text{part.}}$ (%) | $N_{\text{imp}}$ |
|--------------------|--------------------|------------------------------------------|-------------------------|------------------------|------------------|
| Li et al. [7]      | S-1                | 70.4                                     | 0.000                   | 100.                   | 10               |
| Li et al. [7]      | S-2                | 67.5                                     | 0.000                   | 0.000                  | 0                |
| Lu et al. [8]      | ORF1a-F            | 64.0                                     | 0.000                   | 0.000                  | 0                |
| Lu et al. [8]      | ORF1a-P            | 74.7                                     | 0.000                   | 0.000                  | 0                |
| Lu et al. [8]      | ORF1a-R            | 68.8                                     | 0.000                   | 0.000                  | 0                |
| Luminex            | China_N_F          | 67.1                                     | 0.000                   | 90.0                   | 9                |
| Luminex            | China_N_P          | 63.1                                     | 0.000                   | 0.000                  | 0                |
| Luminex            | China_N_R          | 65.6                                     | 0.000                   | 0.000                  | 0                |
| Luminex            | China_ORF_F        | 59.4                                     | 0.000                   | 0.000                  | 0                |
| Luminex            | China_ORF_P        | 81.0                                     | 0.000                   | 100.                   | 10               |
| Luminex            | China_ORF_R        | 61.5                                     | 0.000                   | 0.000                  | 0                |
| Munnink et al. [9] | SARS-CoV-2_1_LEFT  | 67.9                                     | 0.000                   | 0.000                  | 0                |
| Munnink et al. [9] | SARS-CoV-2_1_RIGHT | 69.9                                     | 0.000                   | 0.000                  | 0                |
| Munnink et al. [9] | SARS-CoV-2_2_LEFT  | 69.4                                     | 0.000                   | 0.000                  | 0                |
| Munnink et al. [9] | SARS-CoV-2_2_RIGHT | 67.7                                     | 0.000                   | 0.000                  | 0                |
| Munnink et al. [9] | SARS-CoV-2_3_LEFT  | 68.7                                     | 0.000                   | 90.0                   | 9                |
| Munnink et al. [9] | SARS-CoV-2_3_RIGHT | 68.4                                     | 0.000                   | 0.000                  | 0                |
| Munnink et al. [9] | SARS-CoV-2_4_LEFT  | 66.8                                     | 0.000                   | 0.000                  | 0                |
| Munnink et al. [9] | SARS-CoV-2_4_RIGHT | 66.6                                     | 0.000                   | 0.000                  | 0                |
| Munnink et al. [9] | SARS-CoV-2_5_LEFT  | 67.7                                     | 0.000                   | 0.000                  | 0                |
| Munnink et al. [9] | SARS-CoV-2_5_RIGHT | 68.2                                     | 0.000                   | 0.000                  | 0                |

(continued on next page)

(Table S6, SARS-CoV-1 coverage, continued)

| Set                | Primer/probe        | $T_{ref.}$ (°C) | $C_{strict}$ (%) | $C_{part.}$ (%) | $N_{imp}$ |
|--------------------|---------------------|-----------------|------------------|-----------------|-----------|
| Munnink et al. [9] | SARS-CoV-2_6_LEFT   | 73.2            | 0.000            | 0.000           | 0         |
| Munnink et al. [9] | SARS-CoV-2_6_RIGHT  | 66.3            | 0.000            | 0.000           | 0         |
| Munnink et al. [9] | SARS-CoV-2_7_LEFT   | 71.3            | 0.000            | 0.000           | 0         |
| Munnink et al. [9] | SARS-CoV-2_7_RIGHT  | 67.8            | 0.000            | 0.000           | 0         |
| Munnink et al. [9] | SARS-CoV-2_8_LEFT   | 67.2            | 0.000            | 0.000           | 0         |
| Munnink et al. [9] | SARS-CoV-2_8_RIGHT  | 65.9            | 0.000            | 0.000           | 0         |
| Munnink et al. [9] | SARS-CoV-2_9_LEFT   | 72.3            | 0.000            | 0.000           | 0         |
| Munnink et al. [9] | SARS-CoV-2_9_RIGHT  | 69.0            | 0.000            | 0.000           | 0         |
| Munnink et al. [9] | SARS-CoV-2_11_LEFT  | 66.9            | 0.000            | 0.000           | 0         |
| Munnink et al. [9] | SARS-CoV-2_11_RIGHT | 71.3            | 0.000            | 0.000           | 0         |
| Munnink et al. [9] | SARS-CoV-2_12_RIGHT | 67.2            | 0.000            | 0.000           | 0         |
| Munnink et al. [9] | SARS-CoV-2_13_LEFT  | 70.0            | 0.000            | 0.000           | 0         |
| Munnink et al. [9] | SARS-CoV-2_13_RIGHT | 68.2            | 0.000            | 0.000           | 0         |
| Munnink et al. [9] | SARS-CoV-2_14_LEFT  | 72.3            | 0.000            | 0.000           | 0         |
| Munnink et al. [9] | SARS-CoV-2_14_RIGHT | 68.1            | 0.000            | 0.000           | 0         |
| Munnink et al. [9] | SARS-CoV-2_15_LEFT  | 70.9            | 0.000            | 0.000           | 0         |
| Munnink et al. [9] | SARS-CoV-2_15_RIGHT | 67.9            | 0.000            | 0.000           | 0         |
| Munnink et al. [9] | SARS-CoV-2_16_LEFT  | 69.9            | 0.000            | 0.000           | 0         |
| Munnink et al. [9] | SARS-CoV-2_16_RIGHT | 65.4            | 0.000            | 0.000           | 0         |
| Munnink et al. [9] | SARS-CoV-2_17_LEFT  | 66.7            | 0.000            | 0.000           | 0         |
| Munnink et al. [9] | SARS-CoV-2_17_RIGHT | 67.9            | 0.000            | 0.000           | 0         |

(continued on next page)

(Table S6, SARS-CoV-1 coverage, continued)

| Set                | Primer/probe        | $T_{\text{ref.}}$ (°C) | $C_{\text{strict}}$ (%) | $C_{\text{part.}}$ (%) | $N_{\text{imp}}$ |
|--------------------|---------------------|------------------------|-------------------------|------------------------|------------------|
| Munnink et al. [9] | SARS-CoV-2_18_LEFT  | 68.0                   | 0.000                   | 0.000                  | 0                |
| Munnink et al. [9] | SARS-CoV-2_18_RIGHT | 71.0                   | 0.000                   | 0.000                  | 0                |
| Munnink et al. [9] | SARS-CoV-2_19_LEFT  | 69.6                   | 0.000                   | 0.000                  | 0                |
| Munnink et al. [9] | SARS-CoV-2_19_RIGHT | 69.6                   | 0.000                   | 0.000                  | 0                |
| Munnink et al. [9] | SARS-CoV-2_20_LEFT  | 67.0                   | 0.000                   | 0.000                  | 0                |
| Munnink et al. [9] | SARS-CoV-2_21_LEFT  | 72.1                   | 0.000                   | 0.000                  | 0                |
| Munnink et al. [9] | SARS-CoV-2_21_RIGHT | 66.8                   | 0.000                   | 0.000                  | 0                |
| Munnink et al. [9] | SARS-CoV-2_22_LEFT  | 66.6                   | 0.000                   | 0.000                  | 0                |
| Munnink et al. [9] | SARS-CoV-2_22_RIGHT | 67.7                   | 0.000                   | 0.000                  | 0                |
| Munnink et al. [9] | SARS-CoV-2_23_LEFT  | 70.0                   | 0.000                   | 0.000                  | 0                |
| Munnink et al. [9] | SARS-CoV-2_23_RIGHT | 68.1                   | 0.000                   | 0.000                  | 0                |
| Munnink et al. [9] | SARS-CoV-2_24_LEFT  | 72.0                   | 0.000                   | 100.                   | 10               |
| Munnink et al. [9] | SARS-CoV-2_24_RIGHT | 67.5                   | 0.000                   | 0.000                  | 0                |
| Munnink et al. [9] | SARS-CoV-2_25_LEFT  | 71.7                   | 0.000                   | 90.0                   | 9                |
| Munnink et al. [9] | SARS-CoV-2_25_RIGHT | 67.5                   | 0.000                   | 0.000                  | 0                |
| Munnink et al. [9] | SARS-CoV-2_26_LEFT  | 70.5                   | 0.000                   | 0.000                  | 0                |
| Munnink et al. [9] | SARS-CoV-2_26_RIGHT | 67.5                   | 0.000                   | 0.000                  | 0                |
| Munnink et al. [9] | SARS-CoV-2_27_LEFT  | 68.0                   | 0.000                   | 0.000                  | 0                |
| Munnink et al. [9] | SARS-CoV-2_27_RIGHT | 68.2                   | 0.000                   | 90.0                   | 9                |
| Munnink et al. [9] | SARS-CoV-2_28_LEFT  | 67.5                   | 0.000                   | 10.0                   | 1                |
| Munnink et al. [9] | SARS-CoV-2_28_RIGHT | 67.4                   | 0.000                   | 0.000                  | 0                |

(continued on next page)

(Table S6, SARS-CoV-1 coverage, continued)

| Set                | Primer/probe        | $T_{\text{ref.}}$ (°C) | $C_{\text{strict}}$ (%) | $C_{\text{part.}}$ (%) | $N_{\text{imp}}$ |
|--------------------|---------------------|------------------------|-------------------------|------------------------|------------------|
| Munnink et al. [9] | SARS-CoV-2_29_LEFT  | 71.6                   | 0.000                   | 0.000                  | 0                |
| Munnink et al. [9] | SARS-CoV-2_29_RIGHT | 69.1                   | 0.000                   | 0.000                  | 0                |
| Munnink et al. [9] | SARS-CoV-2_30_LEFT  | 72.3                   | 0.000                   | 0.000                  | 0                |
| Munnink et al. [9] | SARS-CoV-2_30_RIGHT | 69.1                   | 0.000                   | 0.000                  | 0                |
| Munnink et al. [9] | SARS-CoV-2_31_LEFT  | 68.4                   | 0.000                   | 0.000                  | 0                |
| Munnink et al. [9] | SARS-CoV-2_31_RIGHT | 67.4                   | 0.000                   | 0.000                  | 0                |
| Munnink et al. [9] | SARS-CoV-2_32_LEFT  | 68.1                   | 0.000                   | 0.000                  | 0                |
| Munnink et al. [9] | SARS-CoV-2_32_RIGHT | 67.8                   | 0.000                   | 0.000                  | 0                |
| Munnink et al. [9] | SARS-CoV-2_33_LEFT  | 71.5                   | 0.000                   | 100.                   | 10               |
| Munnink et al. [9] | SARS-CoV-2_33_RIGHT | 66.9                   | 0.000                   | 0.000                  | 0                |
| Munnink et al. [9] | SARS-CoV-2_34_LEFT  | 68.6                   | 0.000                   | 0.000                  | 0                |
| Munnink et al. [9] | SARS-CoV-2_34_RIGHT | 66.1                   | 0.000                   | 0.000                  | 0                |
| Munnink et al. [9] | SARS-CoV-2_35_LEFT  | 68.7                   | 0.000                   | 0.000                  | 0                |
| Munnink et al. [9] | SARS-CoV-2_35_RIGHT | 68.7                   | 0.000                   | 0.000                  | 0                |
| Munnink et al. [9] | SARS-CoV-2_36_LEFT  | 70.5                   | 0.000                   | 10.0                   | 1                |
| Munnink et al. [9] | SARS-CoV-2_36_RIGHT | 68.0                   | 0.000                   | 90.0                   | 9                |
| Munnink et al. [9] | SARS-CoV-2_37_LEFT  | 68.5                   | 0.000                   | 90.0                   | 9                |
| Munnink et al. [9] | SARS-CoV-2_37_RIGHT | 67.6                   | 0.000                   | 0.000                  | 0                |
| Munnink et al. [9] | SARS-CoV-2_38_LEFT  | 68.5                   | 90.0                    | 100.                   | 1                |
| Munnink et al. [9] | SARS-CoV-2_38_RIGHT | 67.3                   | 0.000                   | 0.000                  | 0                |
| Munnink et al. [9] | SARS-CoV-2_39_LEFT  | 70.8                   | 0.000                   | 90.0                   | 9                |

(continued on next page)

(Table S6, SARS-CoV-1 coverage, continued)

| Set                | Primer/probe        | $T_{\text{ref.}}$ (°C) | $C_{\text{strict}}$ (%) | $C_{\text{part.}}$ (%) | $N_{\text{imp}}$ |
|--------------------|---------------------|------------------------|-------------------------|------------------------|------------------|
| Munnink et al. [9] | SARS-CoV-2_39_RIGHT | 67.6                   | 0.000                   | 0.000                  | 0                |
| Munnink et al. [9] | SARS-CoV-2_40_LEFT  | 70.7                   | 0.000                   | 90.0                   | 9                |
| Munnink et al. [9] | SARS-CoV-2_40_RIGHT | 67.9                   | 0.000                   | 0.000                  | 0                |
| Munnink et al. [9] | SARS-CoV-2_41_LEFT  | 70.2                   | 0.000                   | 100.                   | 10               |
| Munnink et al. [9] | SARS-CoV-2_41_RIGHT | 68.4                   | 0.000                   | 0.000                  | 0                |
| Munnink et al. [9] | SARS-CoV-2_42_LEFT  | 72.3                   | 0.000                   | 0.000                  | 0                |
| Munnink et al. [9] | SARS-CoV-2_42_RIGHT | 68.8                   | 0.000                   | 0.000                  | 0                |
| Munnink et al. [9] | SARS-CoV-2_43_LEFT  | 69.1                   | 0.000                   | 0.000                  | 0                |
| Munnink et al. [9] | SARS-CoV-2_43_RIGHT | 66.7                   | 0.000                   | 0.000                  | 0                |
| Munnink et al. [9] | SARS-CoV-2_44_LEFT  | 72.3                   | 0.000                   | 90.0                   | 9                |
| Munnink et al. [9] | SARS-CoV-2_44_RIGHT | 65.7                   | 100.                    | 100.                   | 0                |
| Munnink et al. [9] | SARS-CoV-2_45_LEFT  | 69.7                   | 0.000                   | 100.                   | 10               |
| Munnink et al. [9] | SARS-CoV-2_45_RIGHT | 65.0                   | 0.000                   | 0.000                  | 0                |
| Munnink et al. [9] | SARS-CoV-2_46_LEFT  | 69.3                   | 90.0                    | 100.                   | 1                |
| Munnink et al. [9] | SARS-CoV-2_46_RIGHT | 67.3                   | 0.000                   | 0.000                  | 0                |
| Munnink et al. [9] | SARS-CoV-2_47_LEFT  | 64.8                   | 0.000                   | 0.000                  | 0                |
| Munnink et al. [9] | SARS-CoV-2_47_RIGHT | 67.9                   | 90.0                    | 90.0                   | 0                |
| Munnink et al. [9] | SARS-CoV-2_48_LEFT  | 66.7                   | 0.000                   | 0.000                  | 0                |
| Munnink et al. [9] | SARS-CoV-2_48_RIGHT | 67.3                   | 0.000                   | 0.000                  | 0                |
| Munnink et al. [9] | SARS-CoV-2_49_LEFT  | 71.4                   | 0.000                   | 90.0                   | 9                |
| Munnink et al. [9] | SARS-CoV-2_49_RIGHT | 66.8                   | 0.000                   | 0.000                  | 0                |

(continued on next page)

(Table S6, SARS-CoV-1 coverage, continued)

| Set                | Primer/probe        | $T_{\text{ref.}}$ (°C) | $C_{\text{strict}}$ (%) | $C_{\text{part.}}$ (%) | $N_{\text{imp}}$ |
|--------------------|---------------------|------------------------|-------------------------|------------------------|------------------|
| Munnink et al. [9] | SARS-CoV-2_50_LEFT  | 73.8                   | 0.000                   | 100.                   | 10               |
| Munnink et al. [9] | SARS-CoV-2_50_RIGHT | 68.1                   | 0.000                   | 0.000                  | 0                |
| Munnink et al. [9] | SARS-CoV-2_51_LEFT  | 68.9                   | 0.000                   | 90.0                   | 9                |
| Munnink et al. [9] | SARS-CoV-2_51_RIGHT | 67.8                   | 0.000                   | 0.000                  | 0                |
| Munnink et al. [9] | SARS-CoV-2_52_LEFT  | 71.3                   | 0.000                   | 100.                   | 10               |
| Munnink et al. [9] | SARS-CoV-2_52_RIGHT | 68.5                   | 0.000                   | 0.000                  | 0                |
| Munnink et al. [9] | SARS-CoV-2_53_RIGHT | 67.3                   | 0.000                   | 0.000                  | 0                |
| Munnink et al. [9] | SARS-CoV-2_54_LEFT  | 72.2                   | 0.000                   | 100.                   | 10               |
| Munnink et al. [9] | SARS-CoV-2_54_RIGHT | 69.3                   | 90.0                    | 90.0                   | 0                |
| Munnink et al. [9] | SARS-CoV-2_55_LEFT  | 70.0                   | 0.000                   | 0.000                  | 0                |
| Munnink et al. [9] | SARS-CoV-2_55_RIGHT | 68.1                   | 0.000                   | 0.000                  | 0                |
| Munnink et al. [9] | SARS-CoV-2_56_LEFT  | 68.9                   | 0.000                   | 0.000                  | 0                |
| Munnink et al. [9] | SARS-CoV-2_56_RIGHT | 68.4                   | 10.0                    | 100.                   | 9                |
| Munnink et al. [9] | SARS-CoV-2_57_LEFT  | 74.2                   | 0.000                   | 100.                   | 10               |
| Munnink et al. [9] | SARS-CoV-2_57_RIGHT | 66.7                   | 0.000                   | 0.000                  | 0                |
| Munnink et al. [9] | SARS-CoV-2_58_LEFT  | 73.8                   | 0.000                   | 100.                   | 10               |
| Munnink et al. [9] | SARS-CoV-2_58_RIGHT | 67.9                   | 0.000                   | 0.000                  | 0                |
| Munnink et al. [9] | SARS-CoV-2_59_LEFT  | 68.9                   | 0.000                   | 90.0                   | 9                |
| Munnink et al. [9] | SARS-CoV-2_59_RIGHT | 67.0                   | 0.000                   | 0.000                  | 0                |
| Munnink et al. [9] | SARS-CoV-2_60_LEFT  | 71.0                   | 0.000                   | 0.000                  | 0                |
| Munnink et al. [9] | SARS-CoV-2_60_RIGHT | 70.4                   | 0.000                   | 90.0                   | 9                |

(continued on next page)

(Table S6, SARS-CoV-1 coverage, continued)

| Set                | Primer/probe        | $T_{ref.}$ (°C) | $C_{strict}$ (%) | $C_{part.}$ (%) | $N_{imp}$ |
|--------------------|---------------------|-----------------|------------------|-----------------|-----------|
| Munnink et al. [9] | SARS-CoV-2_61_LEFT  | 67.2            | 0.000            | 0.000           | 0         |
| Munnink et al. [9] | SARS-CoV-2_61_RIGHT | 67.3            | 90.0             | 90.0            | 0         |
| Munnink et al. [9] | SARS-CoV-2_62_LEFT  | 74.0            | 0.000            | 0.000           | 0         |
| Munnink et al. [9] | SARS-CoV-2_62_RIGHT | 70.0            | 0.000            | 100.            | 10        |
| Munnink et al. [9] | SARS-CoV-2_63_LEFT  | 69.5            | 0.000            | 0.000           | 0         |
| Munnink et al. [9] | SARS-CoV-2_63_RIGHT | 69.1            | 0.000            | 10.0            | 1         |
| Munnink et al. [9] | SARS-CoV-2_64_LEFT  | 74.9            | 10.0             | 10.0            | 0         |
| Munnink et al. [9] | SARS-CoV-2_64_RIGHT | 72.4            | 0.000            | 0.000           | 0         |
| Munnink et al. [9] | SARS-CoV-2_65_RIGHT | 66.8            | 0.000            | 0.000           | 0         |
| Munnink et al. [9] | SARS-CoV-2_66_RIGHT | 66.6            | 0.000            | 0.000           | 0         |
| Munnink et al. [9] | SARS-CoV-2_67_LEFT  | 71.8            | 0.000            | 0.000           | 0         |
| Munnink et al. [9] | SARS-CoV-2_67_RIGHT | 67.2            | 0.000            | 0.000           | 0         |
| Munnink et al. [9] | SARS-CoV-2_68_LEFT  | 70.1            | 0.000            | 0.000           | 0         |
| Munnink et al. [9] | SARS-CoV-2_68_RIGHT | 69.7            | 0.000            | 0.000           | 0         |
| Munnink et al. [9] | SARS-CoV-2_69_LEFT  | 68.3            | 0.000            | 0.000           | 0         |
| Munnink et al. [9] | SARS-CoV-2_69_RIGHT | 66.0            | 0.000            | 0.000           | 0         |
| Munnink et al. [9] | SARS-CoV-2_70_LEFT  | 67.2            | 0.000            | 0.000           | 0         |
| Munnink et al. [9] | SARS-CoV-2_70_RIGHT | 68.6            | 0.000            | 0.000           | 0         |
| Munnink et al. [9] | SARS-CoV-2_71_LEFT  | 66.9            | 0.000            | 0.000           | 0         |
| Munnink et al. [9] | SARS-CoV-2_71_RIGHT | 69.3            | 0.000            | 0.000           | 0         |
| Munnink et al. [9] | SARS-CoV-2_72_LEFT  | 67.9            | 0.000            | 0.000           | 0         |

(continued on next page)

(Table S6, SARS-CoV-1 coverage, continued)

| Set                | Primer/probe        | $T_{\text{ref.}}$ (°C) | $C_{\text{strict}}$ (%) | $C_{\text{part.}}$ (%) | $N_{\text{imp}}$ |
|--------------------|---------------------|------------------------|-------------------------|------------------------|------------------|
| Munnink et al. [9] | SARS-CoV-2_72_RIGHT | 67.1                   | 0.000                   | 0.000                  | 0                |
| Munnink et al. [9] | SARS-CoV-2_73_LEFT  | 69.6                   | 0.000                   | 0.000                  | 0                |
| Munnink et al. [9] | SARS-CoV-2_73_RIGHT | 66.3                   | 0.000                   | 0.000                  | 0                |
| Munnink et al. [9] | SARS-CoV-2_74_LEFT  | 68.7                   | 0.000                   | 0.000                  | 0                |
| Munnink et al. [9] | SARS-CoV-2_74_RIGHT | 64.4                   | 0.000                   | 0.000                  | 0                |
| Munnink et al. [9] | SARS-CoV-2_75_LEFT  | 68.9                   | 0.000                   | 0.000                  | 0                |
| Munnink et al. [9] | SARS-CoV-2_75_RIGHT | 69.8                   | 0.000                   | 0.000                  | 0                |
| Munnink et al. [9] | SARS-CoV-2_76_LEFT  | 70.7                   | 0.000                   | 0.000                  | 0                |
| Munnink et al. [9] | SARS-CoV-2_76_RIGHT | 68.4                   | 90.0                    | 100.                   | 1                |
| Munnink et al. [9] | SARS-CoV-2_77_LEFT  | 68.8                   | 0.000                   | 0.000                  | 0                |
| Munnink et al. [9] | SARS-CoV-2_77_RIGHT | 67.0                   | 0.000                   | 0.000                  | 0                |
| Munnink et al. [9] | SARS-CoV-2_78_LEFT  | 69.3                   | 0.000                   | 0.000                  | 0                |
| Munnink et al. [9] | SARS-CoV-2_78_RIGHT | 66.8                   | 90.0                    | 100.                   | 1                |
| Munnink et al. [9] | SARS-CoV-2_79_LEFT  | 68.4                   | 0.000                   | 0.000                  | 0                |
| Munnink et al. [9] | SARS-CoV-2_79_RIGHT | 68.7                   | 0.000                   | 0.000                  | 0                |
| Munnink et al. [9] | SARS-CoV-2_80_LEFT  | 68.9                   | 0.000                   | 0.000                  | 0                |
| Munnink et al. [9] | SARS-CoV-2_80_RIGHT | 67.1                   | 0.000                   | 0.000                  | 0                |
| Munnink et al. [9] | SARS-CoV-2_81_LEFT  | 65.9                   | 60.0                    | 90.0                   | 3                |
| Munnink et al. [9] | SARS-CoV-2_81_RIGHT | 66.9                   | 0.000                   | 0.000                  | 0                |
| Munnink et al. [9] | SARS-CoV-2_82_LEFT  | 68.9                   | 0.000                   | 90.0                   | 9                |
| Munnink et al. [9] | SARS-CoV-2_82_RIGHT | 68.7                   | 0.000                   | 0.000                  | 0                |

(continued on next page)



(Table S6, SARS-CoV-1 coverage, continued)

| Set                | Primer/probe        | $T_{\text{ref.}}$ (°C) | $C_{\text{strict}}$ (%) | $C_{\text{part.}}$ (%) | $N_{\text{imp}}$ |
|--------------------|---------------------|------------------------|-------------------------|------------------------|------------------|
| Munnink et al. [9] | SARS-CoV-2_83_LEFT  | 70.0                   | 0.000                   | 0.000                  | 0                |
| Munnink et al. [9] | SARS-CoV-2_83_RIGHT | 65.7                   | 0.000                   | 0.000                  | 0                |
| Munnink et al. [9] | SARS-CoV-2_84_LEFT  | 72.3                   | 0.000                   | 0.000                  | 0                |
| Munnink et al. [9] | SARS-CoV-2_84_RIGHT | 64.6                   | 0.000                   | 0.000                  | 0                |
| Munnink et al. [9] | SARS-CoV-2_85_LEFT  | 69.8                   | 0.000                   | 0.000                  | 0                |
| Munnink et al. [9] | SARS-CoV-2_85_RIGHT | 67.8                   | 0.000                   | 90.0                   | 9                |
| Munnink et al. [9] | SARS-CoV-2_86_LEFT  | 67.0                   | 0.000                   | 0.000                  | 0                |
| Munnink et al. [9] | SARS-CoV-2_86_RIGHT | 68.3                   | 0.000                   | 0.000                  | 0                |
| Munnink et al. [9] | SARS-CoV-2_87_LEFT  | 69.1                   | 0.000                   | 10.0                   | 1                |
| Munnink et al. [9] | SARS-CoV-2_87_RIGHT | 69.8                   | 0.000                   | 0.000                  | 0                |
| Munnink et al. [9] | SARS-CoV-2_88_LEFT  | 68.4                   | 0.000                   | 0.000                  | 0                |
| Munnink et al. [9] | SARS-CoV-2_88_RIGHT | 68.5                   | 0.000                   | 0.000                  | 0                |
| Munnink et al. [9] | SARS-CoV-2_89_LEFT  | 66.9                   | 0.000                   | 0.000                  | 0                |
| Munnink et al. [9] | SARS-CoV-2_89_RIGHT | 68.3                   | 60.0                    | 60.0                   | 0                |
| Nalla et al. [10]  | nCoV_2019-F         | 66.3                   | 0.000                   | 0.000                  | 0                |
| Nalla et al. [10]  | nCoV_2019-P1        | 51.8                   | 90.0                    | 90.0                   | 0                |
| Nalla et al. [10]  | nCoV_2019-P2        | 54.8                   | 0.000                   | 0.000                  | 0                |
| Nalla et al. [10]  | nCoV_2019-R         | 68.0                   | 0.000                   | 100.                   | 10               |
| Niu et al. [11]    | E-F                 | 59.2                   | 80.0                    | 80.0                   | 0                |
| Niu et al. [11]    | E-P                 | 84.2                   | 20.0                    | 100.                   | 8                |
| Niu et al. [11]    | E-R                 | 57.6                   | 100.                    | 100.                   | 0                |

(continued on next page)

(Table S6, SARS-CoV-1 coverage, continued)

| Set              | Primer/probe             | $T_{ref.}$ (°C) | $C_{strict}$ (%) | $C_{part.}$ (%) | $N_{imp}$ |
|------------------|--------------------------|-----------------|------------------|-----------------|-----------|
| Niu et al. [11]  | RdRp-F                   | 64.6            | 90.0             | 90.0            | 0         |
| Niu et al. [11]  | RdRp-P                   | 60.8            | 90.0             | 90.0            | 0         |
| Niu et al. [11]  | RdRp-R                   | 68.4            | 0.000            | 0.000           | 0         |
| Park et al. [12] | SARS-CoV-2_IBS_E2-F      | 65.2            | 0.000            | 0.000           | 0         |
| Park et al. [12] | SARS-CoV-2_IBS_E2-R      | 61.3            | 100.             | 100.            | 0         |
| Park et al. [12] | SARS-CoV-2_IBS_N1-F      | 63.3            | 0.000            | 0.000           | 0         |
| Park et al. [12] | SARS-CoV-2_IBS_N1-R      | 63.9            | 0.000            | 0.000           | 0         |
| Park et al. [12] | SARS-CoV-2_IBS_RdRP2-F   | 63.8            | 90.0             | 90.0            | 0         |
| Park et al. [12] | SARS-CoV-2_IBS_RdRP2-R   | 64.5            | 100.             | 100.            | 0         |
| Park et al. [12] | SARS-CoV-2_IBS_S2-F      | 63.7            | 0.000            | 0.000           | 0         |
| Park et al. [12] | SARS-CoV-2_IBS_S2-R      | 61.6            | 0.000            | 0.000           | 0         |
| Park et al. [12] | SARS-CoV-2_IBS_m_N1-F    | 60.8            | 0.000            | 0.000           | 0         |
| Park et al. [12] | SARS-CoV-2_IBS_m_N1-R    | 65.4            | 0.000            | 0.000           | 0         |
| Park et al. [12] | SARS-CoV-2_IBS_m_N2-F    | 60.3            | 100.             | 100.            | 0         |
| Park et al. [12] | SARS-CoV-2_IBS_m_N2-R    | 62.4            | 100.             | 100.            | 0         |
| Park et al. [12] | SARS-CoV-2_IBS_m_RdRP1-F | 62.7            | 0.000            | 0.000           | 0         |
| Park et al. [12] | SARS-CoV-2_IBS_m_RdRP1-R | 60.8            | 0.000            | 0.000           | 0         |
| Park et al. [12] | SARS-CoV-2_IBS_m_RdRP2-F | 62.9            | 0.000            | 0.000           | 0         |
| Park et al. [12] | SARS-CoV-2_IBS_m_RdRP2-R | 62.2            | 100.             | 100.            | 0         |
| Park et al. [12] | SARS-CoV-2_IBS_m_S1-F    | 62.5            | 0.000            | 0.000           | 0         |
| Park et al. [12] | SARS-CoV-2_IBS_m_S1-R    | 59.3            | 0.000            | 0.000           | 0         |

(continued on next page)

(Table S6, SARS-CoV-1 coverage, continued)

| Set                | Primer/probe          | $T_{ref.}$ (°C) | $C_{strict}$ (%) | $C_{part.}$ (%) | $N_{imp}$ |
|--------------------|-----------------------|-----------------|------------------|-----------------|-----------|
| Park et al. [12]   | SARS-CoV-2_IBS_m_S2-F | 61.4            | 0.000            | 0.000           | 0         |
| Park et al. [12]   | SARS-CoV-2_IBS_m_S2-R | 60.3            | 0.000            | 0.000           | 0         |
| Rahman et al. [13] | M-F                   | 68.9            | 0.000            | 0.000           | 0         |
| Rahman et al. [13] | M-P                   | 70.9            | 0.000            | 100.            | 10        |
| Rahman et al. [13] | M-R                   | 66.3            | 0.000            | 0.000           | 0         |
| Rahman et al. [13] | ORF1b-F               | 65.5            | 0.000            | 0.000           | 0         |
| Rahman et al. [13] | ORF1b-P               | 76.1            | 0.000            | 10.0            | 1         |
| Rahman et al. [13] | ORF1b-R               | 64.2            | 0.000            | 0.000           | 0         |
| Toptan et al. [14] | M-475-F               | 64.8            | 0.000            | 0.000           | 0         |
| Toptan et al. [14] | M-507-P               | 63.5            | 0.000            | 0.000           | 0         |
| Toptan et al. [14] | M-574-R               | 65.4            | 0.000            | 0.000           | 0         |
| Toptan et al. [14] | S-1850-F              | 64.6            | 0.000            | 0.000           | 0         |
| Toptan et al. [14] | S-1884-P              | 62.2            | 0.000            | 0.000           | 0         |
| Toptan et al. [14] | S-1949-R              | 63.0            | 0.000            | 0.000           | 0         |
| Vogels et al. [15] | HKU-N-F               | 58.6            | 100.             | 100.            | 0         |
| Vogels et al. [15] | HKU-N-P               | 63.0            | 90.0             | 90.0            | 0         |
| Vogels et al. [15] | HKU-N-R               | 60.3            | 100.             | 100.            | 0         |
| Vogels et al. [15] | HKU-ORF1-F1           | 61.7            | 0.000            | 0.000           | 0         |
| Vogels et al. [15] | HKU-ORF1-F2           | 64.6            | 90.0             | 90.0            | 0         |
| Vogels et al. [15] | HKU-ORF1-F3           | 58.7            | 10.0             | 10.0            | 0         |
| Vogels et al. [15] | HKU-ORF1-F4           | 61.7            | 0.000            | 0.000           | 0         |

(continued on next page)

(Table S6, SARS-CoV-1 coverage, continued)

| Set                | Primer/probe         | $T_{ref.}$ (°C) | $C_{strict}$ (%) | $C_{part.}$ (%) | $N_{imp}$ |
|--------------------|----------------------|-----------------|------------------|-----------------|-----------|
| Vogels et al. [15] | HKU-ORF1-P1          | 64.5            | 0.000            | 0.000           | 0         |
| Vogels et al. [15] | HKU-ORF1-P2          | 63.6            | 100.             | 100.            | 0         |
| Vogels et al. [15] | HKU-ORF1-R1          | 61.7            | 0.000            | 0.000           | 0         |
| Vogels et al. [15] | HKU-ORF1-R2          | 65.5            | 100.             | 100.            | 0         |
| WHO                | NIID_WH-1_F24381     | 61.2            | 0.000            | 0.000           | 0         |
| WHO                | NIID_WH-1_F501       | 70.3            | 0.000            | 0.000           | 0         |
| WHO                | NIID_WH-1_F509       | 63.3            | 0.000            | 0.000           | 0         |
| WHO                | NIID_WH-1_R24873     | 61.5            | 0.000            | 0.000           | 0         |
| WHO                | NIID_WH-1_R854       | 61.7            | 0.000            | 0.000           | 0         |
| WHO                | NIID_WH-1_R913       | 69.2            | 0.000            | 0.000           | 0         |
| WHO                | NIID_WH-1_Seq_F24383 | 60.4            | 0.000            | 0.000           | 0         |
| WHO                | NIID_WH-1_Seq_F519   | 58.8            | 0.000            | 0.000           | 0         |
| WHO                | NIID_WH-1_Seq_R24865 | 60.1            | 0.000            | 0.000           | 0         |
| WHO                | NIID_WH-1_Seq_R840   | 60.2            | 0.000            | 0.000           | 0         |
| WHO                | WH-NICN-F            | 64.4            | 0.000            | 0.000           | 0         |
| WHO                | WH-NICN-P            | 51.3            | 0.000            | 0.000           | 0         |
| WHO                | WH-NICN-R            | 64.1            | 0.000            | 0.000           | 0         |
| WHO                | WuhanCoV-spk1-f      | 65.4            | 0.000            | 0.000           | 0         |
| WHO                | WuhanCoV-spk2-r      | 64.6            | 0.000            | 0.000           | 0         |
| WHO                | nCoV_IP2-12669Fw     | 54.3            | 0.000            | 0.000           | 0         |
| WHO                | nCoV_IP2-12696bProbe | 67.0            | 0.000            | 0.000           | 0         |

(continued on next page)

(Table S6, SARS-CoV-1 coverage, continued)

| Set             | Primer/probe        | $T_{\text{ref.}}$ ( $^{\circ}\text{C}$ ) | $C_{\text{strict}}$ (%) | $C_{\text{part.}}$ (%) | $N_{\text{imp}}$ |
|-----------------|---------------------|------------------------------------------|-------------------------|------------------------|------------------|
| WHO             | nCoV_IP2-12759Rv    | 53.7                                     | 0.000                   | 0.000                  | 0                |
| WHO             | nCoV_IP4-14059Fw    | 54.8                                     | 0.000                   | 0.000                  | 0                |
| WHO             | nCoV_IP4-14084Probe | 61.3                                     | 0.000                   | 0.000                  | 0                |
| WHO             | nCoV_IP4-14146Rv    | 54.8                                     | 0.000                   | 0.000                  | 0                |
| Yip et al. [16] | nsp2f               | 63.4                                     | 0.000                   | 0.000                  | 0                |
| Yip et al. [16] | nsp2r               | 61.4                                     | 0.000                   | 0.000                  | 0                |

Table S7: Primers and probes, and their respective coverages for non-SARS genomes.

| Set               | Primer/probe   | $T_{\text{ref.}}$ ( $^{\circ}\text{C}$ ) | $C_{\text{strict}}$ (%) | $C_{\text{part.}}$ (%) | $N_{\text{imp}}$ |
|-------------------|----------------|------------------------------------------|-------------------------|------------------------|------------------|
| Bhadra et al. [1] | E-PF           | 62.6                                     | 0.000                   | 0.000                  | 0                |
| Bhadra et al. [1] | E-Probe        | 64.2                                     | 0.000                   | 0.000                  | 0                |
| Bhadra et al. [1] | E-RP           | 61.4                                     | 0.000                   | 0.000                  | 0                |
| Bhadra et al. [1] | M-PF           | 62.2                                     | 0.000                   | 0.000                  | 0                |
| Bhadra et al. [1] | M-Probe        | 61.3                                     | 0.000                   | 0.000                  | 0                |
| Bhadra et al. [1] | M-RP           | 63.3                                     | 0.000                   | 0.000                  | 0                |
| CDC               | 2019-nCoV_N1-F | 62.4                                     | 0.000                   | 0.000                  | 0                |
| CDC               | 2019-nCoV_N1-P | 75.5                                     | 0.000                   | 0.000                  | 0                |
| CDC               | 2019-nCoV_N1-R | 69.0                                     | 0.000                   | 0.000                  | 0                |
| CDC               | 2019-nCoV_N2-F | 61.1                                     | 0.000                   | 0.000                  | 0                |
| CDC               | 2019-nCoV_N2-P | 74.7                                     | 0.000                   | 0.000                  | 0                |
| CDC               | 2019-nCoV_N2-R | 63.3                                     | 0.000                   | 0.000                  | 0                |
| Corman et al. [2] | E_Sarbeco_F    | 65.6                                     | 0.000                   | 0.000                  | 0                |
| Corman et al. [2] | E_Sarbeco_P1   | 78.2                                     | 0.000                   | 0.000                  | 0                |
| Corman et al. [2] | E_Sarbeco_R    | 65.9                                     | 0.000                   | 0.000                  | 0                |
| Corman et al. [2] | N_Sarbeco_F    | 64.6                                     | 0.000                   | 0.000                  | 0                |
| Corman et al. [2] | N_Sarbeco_P    | 71.9                                     | 0.000                   | 0.000                  | 0                |
| Corman et al. [2] | N_Sarbeco_R    | 65.1                                     | 0.000                   | 0.000                  | 0                |
| Corman et al. [2] | RdRp_SARSr-FA  | 69.1                                     | 0.000                   | 0.000                  | 0                |

(continued on next page)

(Table S7, non-SARS coverage, continued)

| Set               | Primer/probe    | $T_{\text{ref.}}$ (°C) | $C_{\text{strict}}$ (%) | $C_{\text{part.}}$ (%) | $N_{\text{imp}}$ |
|-------------------|-----------------|------------------------|-------------------------|------------------------|------------------|
| Corman et al. [2] | RdRp_SARSr-FG   | 70.7                   | 0.000                   | 0.000                  | 0                |
| Corman et al. [2] | RdRp_SARSr-P1-1 | 79.2                   | 0.000                   | 0.000                  | 0                |
| Corman et al. [2] | RdRp_SARSr-P1-2 | 81.7                   | 0.000                   | 0.000                  | 0                |
| Corman et al. [2] | RdRp_SARSr-P1-3 | 77.3                   | 0.000                   | 0.000                  | 0                |
| Corman et al. [2] | RdRp_SARSr-P1-4 | 79.9                   | 0.000                   | 0.000                  | 0                |
| Corman et al. [2] | RdRp_SARSr-P1-5 | 78.2                   | 0.000                   | 19.2                   | 60               |
| Corman et al. [2] | RdRp_SARSr-P1-6 | 80.7                   | 0.000                   | 0.000                  | 0                |
| Corman et al. [2] | RdRp_SARSr-P1-7 | 76.2                   | 0.000                   | 0.000                  | 0                |
| Corman et al. [2] | RdRp_SARSr-P1-8 | 78.8                   | 0.000                   | 0.000                  | 0                |
| Corman et al. [2] | RdRp_SARSr-P2   | 76.3                   | 0.000                   | 0.000                  | 0                |
| Corman et al. [2] | RdRp_SARSr-R1   | 61.7                   | 0.000                   | 0.000                  | 0                |
| Corman et al. [2] | RdRp_SARSr-R2   | 62.1                   | 0.000                   | 0.000                  | 0                |
| Corman et al. [2] | RdRp_SARSr-R3   | 63.5                   | 0.000                   | 0.000                  | 0                |
| Corman et al. [2] | RdRp_SARSr-R4   | 63.8                   | 0.000                   | 0.000                  | 0                |
| Davda et al. [3]  | MF1             | 56.5                   | 0.000                   | 0.000                  | 0                |
| Davda et al. [3]  | MF2             | 58.6                   | 0.000                   | 0.000                  | 0                |
| Davda et al. [3]  | MR1             | 58.9                   | 0.000                   | 0.000                  | 0                |
| Davda et al. [3]  | MR2             | 60.2                   | 0.000                   | 0.000                  | 0                |
| Davda et al. [3]  | N1F1            | 66.7                   | 0.000                   | 0.000                  | 0                |
| Davda et al. [3]  | N1F2            | 70.3                   | 0.000                   | 0.000                  | 0                |
| Davda et al. [3]  | N1R1            | 62.2                   | 0.000                   | 0.000                  | 0                |

(continued on next page)

(Table S7, non-SARS coverage, continued)

| Set                | Primer/probe | $T_{\text{ref.}}$ (°C) | $C_{\text{strict}}$ (%) | $C_{\text{part.}}$ (%) | $N_{\text{imp}}$ |
|--------------------|--------------|------------------------|-------------------------|------------------------|------------------|
| Davda et al. [3]   | N1R2         | 68.0                   | 0.000                   | 0.000                  | 0                |
| Davda et al. [3]   | N2F1         | 60.3                   | 0.000                   | 0.000                  | 0                |
| Davda et al. [3]   | N2F2         | 57.6                   | 0.000                   | 0.000                  | 0                |
| Davda et al. [3]   | N2R1         | 59.9                   | 0.000                   | 0.000                  | 0                |
| Davda et al. [3]   | N2R2         | 57.0                   | 0.000                   | 0.000                  | 0                |
| Davda et al. [3]   | Orf1abF1     | 69.7                   | 0.000                   | 0.000                  | 0                |
| Davda et al. [3]   | Orf1abF2     | 63.2                   | 0.000                   | 0.000                  | 0                |
| Davda et al. [3]   | Orf1abR1     | 67.4                   | 0.000                   | 0.000                  | 0                |
| Davda et al. [3]   | Orf1abR2     | 61.7                   | 0.000                   | 0.000                  | 0                |
| Grant et al. [4]   | NgeneProbe   | 79.9                   | 0.000                   | 0.000                  | 0                |
| Grant et al. [4]   | NgeneTaq1    | 62.4                   | 0.000                   | 0.000                  | 0                |
| Grant et al. [4]   | NgeneTaq2    | 63.8                   | 0.000                   | 0.000                  | 0                |
| Hirotsu et al. [5] | NIID-N2-F    | 60.6                   | 0.000                   | 0.000                  | 0                |
| Hirotsu et al. [5] | NIID-N2-P    | 68.8                   | 0.000                   | 0.000                  | 0                |
| Hirotsu et al. [5] | NIID-N2-R    | 63.9                   | 0.000                   | 0.000                  | 0                |
| Lanza et al. [6]   | UFRN_1_F     | 63.7                   | 0.000                   | 0.000                  | 0                |
| Lanza et al. [6]   | UFRN_1_P     | 75.0                   | 0.000                   | 0.000                  | 0                |
| Lanza et al. [6]   | UFRN_1_R     | 62.9                   | 0.000                   | 0.000                  | 0                |
| Lanza et al. [6]   | UFRN_2_F     | 62.2                   | 0.000                   | 0.000                  | 0                |
| Lanza et al. [6]   | UFRN_2_P     | 69.7                   | 0.000                   | 0.000                  | 0                |
| Lanza et al. [6]   | UFRN_2_R     | 62.0                   | 0.000                   | 0.000                  | 0                |

(continued on next page)



(Table S7, non-SARS coverage, continued)

| Set              | Primer/probe | $T_{\text{ref.}}$ (°C) | $C_{\text{strict}}$ (%) | $C_{\text{part.}}$ (%) | $N_{\text{imp}}$ |
|------------------|--------------|------------------------|-------------------------|------------------------|------------------|
| Lanza et al. [6] | UFRN_3_F     | 62.9                   | 0.000                   | 0.000                  | 0                |
| Lanza et al. [6] | UFRN_3_P     | 69.1                   | 0.000                   | 0.000                  | 0                |
| Lanza et al. [6] | UFRN_3_R     | 60.5                   | 0.000                   | 0.000                  | 0                |
| Lanza et al. [6] | UFRN_4_F     | 62.0                   | 0.000                   | 0.000                  | 0                |
| Lanza et al. [6] | UFRN_4_P     | 69.0                   | 0.000                   | 0.000                  | 0                |
| Lanza et al. [6] | UFRN_4_R     | 64.9                   | 0.000                   | 0.000                  | 0                |
| Lanza et al. [6] | UFRN_5_F     | 62.2                   | 0.000                   | 0.000                  | 0                |
| Lanza et al. [6] | UFRN_5_P     | 73.0                   | 0.000                   | 0.000                  | 0                |
| Lanza et al. [6] | UFRN_5_R     | 63.7                   | 0.000                   | 0.000                  | 0                |
| Lanza et al. [6] | UFRN_6_F     | 63.2                   | 0.000                   | 0.000                  | 0                |
| Lanza et al. [6] | UFRN_6_P     | 71.3                   | 0.000                   | 0.000                  | 0                |
| Lanza et al. [6] | UFRN_6_R     | 62.4                   | 0.000                   | 0.000                  | 0                |
| Lanza et al. [6] | UFRN_7_F     | 62.5                   | 0.000                   | 0.000                  | 0                |
| Lanza et al. [6] | UFRN_7_P     | 71.7                   | 0.000                   | 0.000                  | 0                |
| Lanza et al. [6] | UFRN_7_R     | 61.5                   | 0.000                   | 0.000                  | 0                |
| Lanza et al. [6] | UFRN_8_F     | 61.3                   | 0.000                   | 0.000                  | 0                |
| Lanza et al. [6] | UFRN_8_P     | 70.5                   | 0.000                   | 0.000                  | 0                |
| Lanza et al. [6] | UFRN_8_R     | 62.0                   | 0.000                   | 0.000                  | 0                |
| Lanza et al. [6] | UFRN_9_F     | 60.5                   | 0.000                   | 0.000                  | 0                |
| Lanza et al. [6] | UFRN_9_P     | 72.6                   | 0.000                   | 0.000                  | 0                |
| Lanza et al. [6] | UFRN_9_R     | 62.4                   | 0.000                   | 0.000                  | 0                |

(continued on next page)

(Table S7, non-SARS coverage, continued)

| Set                | Primer/probe       | $T_{\text{ref.}}$ (°C) | $C_{\text{strict}}$ (%) | $C_{\text{part.}}$ (%) | $N_{\text{imp}}$ |
|--------------------|--------------------|------------------------|-------------------------|------------------------|------------------|
| Li et al. [7]      | S-1                | 70.4                   | 0.000                   | 0.000                  | 0                |
| Li et al. [7]      | S-2                | 67.5                   | 0.000                   | 0.000                  | 0                |
| Lu et al. [8]      | ORF1a-F            | 64.0                   | 0.000                   | 0.000                  | 0                |
| Lu et al. [8]      | ORF1a-P            | 74.7                   | 0.000                   | 0.000                  | 0                |
| Lu et al. [8]      | ORF1a-R            | 68.8                   | 0.000                   | 0.000                  | 0                |
| Luminex            | China_N_F          | 67.1                   | 0.000                   | 0.000                  | 0                |
| Luminex            | China_N_P          | 63.1                   | 0.000                   | 0.000                  | 0                |
| Luminex            | China_N_R          | 65.6                   | 0.000                   | 0.000                  | 0                |
| Luminex            | China_ORF_F        | 59.4                   | 0.000                   | 0.000                  | 0                |
| Luminex            | China_ORF_P        | 81.0                   | 0.000                   | 0.000                  | 0                |
| Luminex            | China_ORF_R        | 61.5                   | 0.000                   | 0.000                  | 0                |
| Munnink et al. [9] | SARS-CoV-2_1_LEFT  | 67.9                   | 0.000                   | 0.000                  | 0                |
| Munnink et al. [9] | SARS-CoV-2_1_RIGHT | 69.9                   | 0.000                   | 0.000                  | 0                |
| Munnink et al. [9] | SARS-CoV-2_2_LEFT  | 69.4                   | 0.000                   | 0.000                  | 0                |
| Munnink et al. [9] | SARS-CoV-2_2_RIGHT | 67.7                   | 0.000                   | 0.000                  | 0                |
| Munnink et al. [9] | SARS-CoV-2_3_LEFT  | 68.7                   | 0.000                   | 0.000                  | 0                |
| Munnink et al. [9] | SARS-CoV-2_3_RIGHT | 68.4                   | 0.000                   | 0.000                  | 0                |
| Munnink et al. [9] | SARS-CoV-2_4_LEFT  | 66.8                   | 0.000                   | 0.000                  | 0                |
| Munnink et al. [9] | SARS-CoV-2_4_RIGHT | 66.6                   | 0.000                   | 0.000                  | 0                |
| Munnink et al. [9] | SARS-CoV-2_5_LEFT  | 67.7                   | 0.000                   | 0.000                  | 0                |
| Munnink et al. [9] | SARS-CoV-2_5_RIGHT | 68.2                   | 0.000                   | 0.000                  | 0                |

(continued on next page)

(Table S7, non-SARS coverage, continued)

| Set                | Primer/probe        | $T_{\text{ref.}}$ (°C) | $C_{\text{strict}}$ (%) | $C_{\text{part.}}$ (%) | $N_{\text{imp}}$ |
|--------------------|---------------------|------------------------|-------------------------|------------------------|------------------|
| Munnink et al. [9] | SARS-CoV-2_6_LEFT   | 73.2                   | 0.000                   | 0.000                  | 0                |
| Munnink et al. [9] | SARS-CoV-2_6_RIGHT  | 66.3                   | 0.000                   | 0.000                  | 0                |
| Munnink et al. [9] | SARS-CoV-2_7_LEFT   | 71.3                   | 0.000                   | 0.000                  | 0                |
| Munnink et al. [9] | SARS-CoV-2_7_RIGHT  | 67.8                   | 0.000                   | 0.000                  | 0                |
| Munnink et al. [9] | SARS-CoV-2_8_LEFT   | 67.2                   | 0.000                   | 0.000                  | 0                |
| Munnink et al. [9] | SARS-CoV-2_8_RIGHT  | 65.9                   | 0.000                   | 0.000                  | 0                |
| Munnink et al. [9] | SARS-CoV-2_9_LEFT   | 72.3                   | 0.000                   | 0.000                  | 0                |
| Munnink et al. [9] | SARS-CoV-2_9_RIGHT  | 69.0                   | 0.000                   | 0.000                  | 0                |
| Munnink et al. [9] | SARS-CoV-2_11_LEFT  | 66.9                   | 0.000                   | 0.000                  | 0                |
| Munnink et al. [9] | SARS-CoV-2_11_RIGHT | 71.3                   | 0.000                   | 0.000                  | 0                |
| Munnink et al. [9] | SARS-CoV-2_12_RIGHT | 67.2                   | 0.000                   | 0.000                  | 0                |
| Munnink et al. [9] | SARS-CoV-2_13_LEFT  | 70.0                   | 0.000                   | 0.000                  | 0                |
| Munnink et al. [9] | SARS-CoV-2_13_RIGHT | 68.2                   | 0.000                   | 0.000                  | 0                |
| Munnink et al. [9] | SARS-CoV-2_14_LEFT  | 72.3                   | 0.000                   | 0.000                  | 0                |
| Munnink et al. [9] | SARS-CoV-2_14_RIGHT | 68.1                   | 0.000                   | 0.000                  | 0                |
| Munnink et al. [9] | SARS-CoV-2_15_LEFT  | 70.9                   | 0.000                   | 0.000                  | 0                |
| Munnink et al. [9] | SARS-CoV-2_15_RIGHT | 67.9                   | 0.000                   | 0.000                  | 0                |
| Munnink et al. [9] | SARS-CoV-2_16_LEFT  | 69.9                   | 0.000                   | 0.000                  | 0                |
| Munnink et al. [9] | SARS-CoV-2_16_RIGHT | 65.4                   | 0.000                   | 0.000                  | 0                |
| Munnink et al. [9] | SARS-CoV-2_17_LEFT  | 66.7                   | 0.000                   | 0.000                  | 0                |
| Munnink et al. [9] | SARS-CoV-2_17_RIGHT | 67.9                   | 0.000                   | 0.000                  | 0                |

(continued on next page)

(Table S7, non-SARS coverage, continued)

| Set                | Primer/probe        | $T_{\text{ref.}}$ (°C) | $C_{\text{strict}}$ (%) | $C_{\text{part.}}$ (%) | $N_{\text{imp}}$ |
|--------------------|---------------------|------------------------|-------------------------|------------------------|------------------|
| Munnink et al. [9] | SARS-CoV-2_18_LEFT  | 68.0                   | 0.000                   | 0.000                  | 0                |
| Munnink et al. [9] | SARS-CoV-2_18_RIGHT | 71.0                   | 0.000                   | 0.000                  | 0                |
| Munnink et al. [9] | SARS-CoV-2_19_LEFT  | 69.6                   | 0.000                   | 0.000                  | 0                |
| Munnink et al. [9] | SARS-CoV-2_19_RIGHT | 69.6                   | 0.000                   | 0.000                  | 0                |
| Munnink et al. [9] | SARS-CoV-2_20_LEFT  | 67.0                   | 0.000                   | 0.000                  | 0                |
| Munnink et al. [9] | SARS-CoV-2_21_LEFT  | 72.1                   | 0.000                   | 0.000                  | 0                |
| Munnink et al. [9] | SARS-CoV-2_21_RIGHT | 66.8                   | 0.000                   | 0.000                  | 0                |
| Munnink et al. [9] | SARS-CoV-2_22_LEFT  | 66.6                   | 0.000                   | 0.000                  | 0                |
| Munnink et al. [9] | SARS-CoV-2_22_RIGHT | 67.7                   | 0.000                   | 0.000                  | 0                |
| Munnink et al. [9] | SARS-CoV-2_23_LEFT  | 70.0                   | 0.000                   | 0.000                  | 0                |
| Munnink et al. [9] | SARS-CoV-2_23_RIGHT | 68.1                   | 0.000                   | 0.000                  | 0                |
| Munnink et al. [9] | SARS-CoV-2_24_LEFT  | 72.0                   | 0.000                   | 0.000                  | 0                |
| Munnink et al. [9] | SARS-CoV-2_24_RIGHT | 67.5                   | 0.000                   | 0.000                  | 0                |
| Munnink et al. [9] | SARS-CoV-2_25_LEFT  | 71.7                   | 0.000                   | 0.000                  | 0                |
| Munnink et al. [9] | SARS-CoV-2_25_RIGHT | 67.5                   | 0.000                   | 0.000                  | 0                |
| Munnink et al. [9] | SARS-CoV-2_26_LEFT  | 70.5                   | 0.000                   | 0.000                  | 0                |
| Munnink et al. [9] | SARS-CoV-2_26_RIGHT | 67.5                   | 0.000                   | 0.000                  | 0                |
| Munnink et al. [9] | SARS-CoV-2_27_LEFT  | 68.0                   | 0.000                   | 0.000                  | 0                |
| Munnink et al. [9] | SARS-CoV-2_27_RIGHT | 68.2                   | 0.000                   | 0.000                  | 0                |
| Munnink et al. [9] | SARS-CoV-2_28_LEFT  | 67.5                   | 0.000                   | 0.000                  | 0                |
| Munnink et al. [9] | SARS-CoV-2_28_RIGHT | 67.4                   | 0.000                   | 0.000                  | 0                |

(continued on next page)

(Table S7, non-SARS coverage, continued)

| Set                | Primer/probe        | $T_{\text{ref.}}$ (°C) | $C_{\text{strict}}$ (%) | $C_{\text{part.}}$ (%) | $N_{\text{imp}}$ |
|--------------------|---------------------|------------------------|-------------------------|------------------------|------------------|
| Munnink et al. [9] | SARS-CoV-2_29_LEFT  | 71.6                   | 0.000                   | 0.000                  | 0                |
| Munnink et al. [9] | SARS-CoV-2_29_RIGHT | 69.1                   | 0.000                   | 0.000                  | 0                |
| Munnink et al. [9] | SARS-CoV-2_30_LEFT  | 72.3                   | 0.000                   | 0.000                  | 0                |
| Munnink et al. [9] | SARS-CoV-2_30_RIGHT | 69.1                   | 0.000                   | 0.000                  | 0                |
| Munnink et al. [9] | SARS-CoV-2_31_LEFT  | 68.4                   | 0.000                   | 0.000                  | 0                |
| Munnink et al. [9] | SARS-CoV-2_31_RIGHT | 67.4                   | 0.000                   | 0.000                  | 0                |
| Munnink et al. [9] | SARS-CoV-2_32_LEFT  | 68.1                   | 0.000                   | 0.000                  | 0                |
| Munnink et al. [9] | SARS-CoV-2_32_RIGHT | 67.8                   | 0.000                   | 0.000                  | 0                |
| Munnink et al. [9] | SARS-CoV-2_33_LEFT  | 71.5                   | 0.000                   | 0.000                  | 0                |
| Munnink et al. [9] | SARS-CoV-2_33_RIGHT | 66.9                   | 0.000                   | 0.000                  | 0                |
| Munnink et al. [9] | SARS-CoV-2_34_LEFT  | 68.6                   | 0.000                   | 0.000                  | 0                |
| Munnink et al. [9] | SARS-CoV-2_34_RIGHT | 66.1                   | 0.000                   | 0.000                  | 0                |
| Munnink et al. [9] | SARS-CoV-2_35_LEFT  | 68.7                   | 0.000                   | 0.000                  | 0                |
| Munnink et al. [9] | SARS-CoV-2_35_RIGHT | 68.7                   | 0.000                   | 0.000                  | 0                |
| Munnink et al. [9] | SARS-CoV-2_36_LEFT  | 70.5                   | 0.000                   | 0.000                  | 0                |
| Munnink et al. [9] | SARS-CoV-2_36_RIGHT | 68.0                   | 0.000                   | 0.000                  | 0                |
| Munnink et al. [9] | SARS-CoV-2_37_LEFT  | 68.5                   | 0.000                   | 0.000                  | 0                |
| Munnink et al. [9] | SARS-CoV-2_37_RIGHT | 67.6                   | 0.000                   | 0.000                  | 0                |
| Munnink et al. [9] | SARS-CoV-2_38_LEFT  | 68.5                   | 0.000                   | 0.000                  | 0                |
| Munnink et al. [9] | SARS-CoV-2_38_RIGHT | 67.3                   | 0.000                   | 0.000                  | 0                |
| Munnink et al. [9] | SARS-CoV-2_39_LEFT  | 70.8                   | 0.000                   | 0.000                  | 0                |

(continued on next page)

(Table S7, non-SARS coverage, continued)

| Set                | Primer/probe        | $T_{ref.}$ (°C) | $C_{strict}$ (%) | $C_{part.}$ (%) | $N_{imp}$ |
|--------------------|---------------------|-----------------|------------------|-----------------|-----------|
| Munnink et al. [9] | SARS-CoV-2_39_RIGHT | 67.6            | 0.000            | 0.000           | 0         |
| Munnink et al. [9] | SARS-CoV-2_40_LEFT  | 70.7            | 0.000            | 0.000           | 0         |
| Munnink et al. [9] | SARS-CoV-2_40_RIGHT | 67.9            | 0.000            | 0.000           | 0         |
| Munnink et al. [9] | SARS-CoV-2_41_LEFT  | 70.2            | 0.000            | 0.000           | 0         |
| Munnink et al. [9] | SARS-CoV-2_41_RIGHT | 68.4            | 0.000            | 0.000           | 0         |
| Munnink et al. [9] | SARS-CoV-2_42_LEFT  | 72.3            | 0.000            | 0.000           | 0         |
| Munnink et al. [9] | SARS-CoV-2_42_RIGHT | 68.8            | 0.000            | 0.000           | 0         |
| Munnink et al. [9] | SARS-CoV-2_43_LEFT  | 69.1            | 0.000            | 0.000           | 0         |
| Munnink et al. [9] | SARS-CoV-2_43_RIGHT | 66.7            | 0.000            | 0.000           | 0         |
| Munnink et al. [9] | SARS-CoV-2_44_LEFT  | 72.3            | 0.000            | 0.000           | 0         |
| Munnink et al. [9] | SARS-CoV-2_44_RIGHT | 65.7            | 0.000            | 0.639           | 2         |
| Munnink et al. [9] | SARS-CoV-2_45_LEFT  | 69.7            | 0.000            | 0.000           | 0         |
| Munnink et al. [9] | SARS-CoV-2_45_RIGHT | 65.0            | 0.000            | 0.000           | 0         |
| Munnink et al. [9] | SARS-CoV-2_46_LEFT  | 69.3            | 0.000            | 0.000           | 0         |
| Munnink et al. [9] | SARS-CoV-2_46_RIGHT | 67.3            | 0.000            | 0.000           | 0         |
| Munnink et al. [9] | SARS-CoV-2_47_LEFT  | 64.8            | 0.000            | 0.000           | 0         |
| Munnink et al. [9] | SARS-CoV-2_47_RIGHT | 67.9            | 0.000            | 0.000           | 0         |
| Munnink et al. [9] | SARS-CoV-2_48_LEFT  | 66.7            | 0.000            | 0.000           | 0         |
| Munnink et al. [9] | SARS-CoV-2_48_RIGHT | 67.3            | 0.000            | 0.000           | 0         |
| Munnink et al. [9] | SARS-CoV-2_49_LEFT  | 71.4            | 0.000            | 0.000           | 0         |
| Munnink et al. [9] | SARS-CoV-2_49_RIGHT | 66.8            | 0.000            | 0.000           | 0         |

(continued on next page)

(Table S7, non-SARS coverage, continued)

| Set                | Primer/probe        | $T_{\text{ref.}}$ (°C) | $C_{\text{strict}}$ (%) | $C_{\text{part.}}$ (%) | $N_{\text{imp}}$ |
|--------------------|---------------------|------------------------|-------------------------|------------------------|------------------|
| Munnink et al. [9] | SARS-CoV-2_50_LEFT  | 73.8                   | 0.000                   | 0.000                  | 0                |
| Munnink et al. [9] | SARS-CoV-2_50_RIGHT | 68.1                   | 0.000                   | 0.000                  | 0                |
| Munnink et al. [9] | SARS-CoV-2_51_LEFT  | 68.9                   | 0.000                   | 0.000                  | 0                |
| Munnink et al. [9] | SARS-CoV-2_51_RIGHT | 67.8                   | 0.000                   | 0.000                  | 0                |
| Munnink et al. [9] | SARS-CoV-2_52_LEFT  | 71.3                   | 0.000                   | 0.000                  | 0                |
| Munnink et al. [9] | SARS-CoV-2_52_RIGHT | 68.5                   | 0.000                   | 0.000                  | 0                |
| Munnink et al. [9] | SARS-CoV-2_53_RIGHT | 67.3                   | 0.000                   | 0.000                  | 0                |
| Munnink et al. [9] | SARS-CoV-2_54_LEFT  | 72.2                   | 0.000                   | 0.000                  | 0                |
| Munnink et al. [9] | SARS-CoV-2_54_RIGHT | 69.3                   | 0.000                   | 0.000                  | 0                |
| Munnink et al. [9] | SARS-CoV-2_55_LEFT  | 70.0                   | 0.000                   | 0.000                  | 0                |
| Munnink et al. [9] | SARS-CoV-2_55_RIGHT | 68.1                   | 0.000                   | 0.000                  | 0                |
| Munnink et al. [9] | SARS-CoV-2_56_LEFT  | 68.9                   | 0.000                   | 0.000                  | 0                |
| Munnink et al. [9] | SARS-CoV-2_56_RIGHT | 68.4                   | 0.000                   | 0.000                  | 0                |
| Munnink et al. [9] | SARS-CoV-2_57_LEFT  | 74.2                   | 0.000                   | 0.000                  | 0                |
| Munnink et al. [9] | SARS-CoV-2_57_RIGHT | 66.7                   | 0.000                   | 0.000                  | 0                |
| Munnink et al. [9] | SARS-CoV-2_58_LEFT  | 73.8                   | 0.000                   | 0.000                  | 0                |
| Munnink et al. [9] | SARS-CoV-2_58_RIGHT | 67.9                   | 0.000                   | 0.000                  | 0                |
| Munnink et al. [9] | SARS-CoV-2_59_LEFT  | 68.9                   | 0.000                   | 0.000                  | 0                |
| Munnink et al. [9] | SARS-CoV-2_59_RIGHT | 67.0                   | 0.000                   | 0.000                  | 0                |
| Munnink et al. [9] | SARS-CoV-2_60_LEFT  | 71.0                   | 0.000                   | 0.000                  | 0                |
| Munnink et al. [9] | SARS-CoV-2_60_RIGHT | 70.4                   | 0.000                   | 0.000                  | 0                |

(continued on next page)

(Table S7, non-SARS coverage, continued)

| Set                | Primer/probe        | $T_{\text{ref.}}$ (°C) | $C_{\text{strict}}$ (%) | $C_{\text{part.}}$ (%) | $N_{\text{imp}}$ |
|--------------------|---------------------|------------------------|-------------------------|------------------------|------------------|
| Munnink et al. [9] | SARS-CoV-2_61_LEFT  | 67.2                   | 0.000                   | 0.000                  | 0                |
| Munnink et al. [9] | SARS-CoV-2_61_RIGHT | 67.3                   | 0.000                   | 0.000                  | 0                |
| Munnink et al. [9] | SARS-CoV-2_62_LEFT  | 74.0                   | 0.000                   | 0.000                  | 0                |
| Munnink et al. [9] | SARS-CoV-2_62_RIGHT | 70.0                   | 0.000                   | 0.000                  | 0                |
| Munnink et al. [9] | SARS-CoV-2_63_LEFT  | 69.5                   | 0.000                   | 0.000                  | 0                |
| Munnink et al. [9] | SARS-CoV-2_63_RIGHT | 69.1                   | 0.000                   | 0.000                  | 0                |
| Munnink et al. [9] | SARS-CoV-2_64_LEFT  | 74.9                   | 0.000                   | 0.000                  | 0                |
| Munnink et al. [9] | SARS-CoV-2_64_RIGHT | 72.4                   | 0.000                   | 0.000                  | 0                |
| Munnink et al. [9] | SARS-CoV-2_65_RIGHT | 66.8                   | 0.000                   | 0.000                  | 0                |
| Munnink et al. [9] | SARS-CoV-2_66_RIGHT | 66.6                   | 0.000                   | 0.000                  | 0                |
| Munnink et al. [9] | SARS-CoV-2_67_LEFT  | 71.8                   | 0.000                   | 0.000                  | 0                |
| Munnink et al. [9] | SARS-CoV-2_67_RIGHT | 67.2                   | 0.000                   | 0.000                  | 0                |
| Munnink et al. [9] | SARS-CoV-2_68_LEFT  | 70.1                   | 0.000                   | 0.000                  | 0                |
| Munnink et al. [9] | SARS-CoV-2_68_RIGHT | 69.7                   | 0.000                   | 0.000                  | 0                |
| Munnink et al. [9] | SARS-CoV-2_69_LEFT  | 68.3                   | 0.000                   | 0.000                  | 0                |
| Munnink et al. [9] | SARS-CoV-2_69_RIGHT | 66.0                   | 0.000                   | 0.000                  | 0                |
| Munnink et al. [9] | SARS-CoV-2_70_LEFT  | 67.2                   | 0.000                   | 0.000                  | 0                |
| Munnink et al. [9] | SARS-CoV-2_70_RIGHT | 68.6                   | 0.000                   | 0.000                  | 0                |
| Munnink et al. [9] | SARS-CoV-2_71_LEFT  | 66.9                   | 0.000                   | 0.000                  | 0                |
| Munnink et al. [9] | SARS-CoV-2_71_RIGHT | 69.3                   | 0.000                   | 0.000                  | 0                |
| Munnink et al. [9] | SARS-CoV-2_72_LEFT  | 67.9                   | 0.000                   | 0.000                  | 0                |

(continued on next page)



(Table S7, non-SARS coverage, continued)

| Set                | Primer/probe        | $T_{\text{ref.}}$ (°C) | $C_{\text{strict}}$ (%) | $C_{\text{part.}}$ (%) | $N_{\text{imp}}$ |
|--------------------|---------------------|------------------------|-------------------------|------------------------|------------------|
| Munnink et al. [9] | SARS-CoV-2_72_RIGHT | 67.1                   | 0.000                   | 0.000                  | 0                |
| Munnink et al. [9] | SARS-CoV-2_73_LEFT  | 69.6                   | 0.000                   | 0.000                  | 0                |
| Munnink et al. [9] | SARS-CoV-2_73_RIGHT | 66.3                   | 0.000                   | 0.000                  | 0                |
| Munnink et al. [9] | SARS-CoV-2_74_LEFT  | 68.7                   | 0.000                   | 0.000                  | 0                |
| Munnink et al. [9] | SARS-CoV-2_74_RIGHT | 64.4                   | 0.000                   | 0.000                  | 0                |
| Munnink et al. [9] | SARS-CoV-2_75_LEFT  | 68.9                   | 0.000                   | 0.000                  | 0                |
| Munnink et al. [9] | SARS-CoV-2_75_RIGHT | 69.8                   | 0.000                   | 0.000                  | 0                |
| Munnink et al. [9] | SARS-CoV-2_76_LEFT  | 70.7                   | 0.000                   | 0.000                  | 0                |
| Munnink et al. [9] | SARS-CoV-2_76_RIGHT | 68.4                   | 0.000                   | 0.000                  | 0                |
| Munnink et al. [9] | SARS-CoV-2_77_LEFT  | 68.8                   | 0.000                   | 0.000                  | 0                |
| Munnink et al. [9] | SARS-CoV-2_77_RIGHT | 67.0                   | 0.000                   | 0.000                  | 0                |
| Munnink et al. [9] | SARS-CoV-2_78_LEFT  | 69.3                   | 0.000                   | 0.000                  | 0                |
| Munnink et al. [9] | SARS-CoV-2_78_RIGHT | 66.8                   | 0.000                   | 0.000                  | 0                |
| Munnink et al. [9] | SARS-CoV-2_79_LEFT  | 68.4                   | 0.000                   | 0.000                  | 0                |
| Munnink et al. [9] | SARS-CoV-2_79_RIGHT | 68.7                   | 0.000                   | 0.000                  | 0                |
| Munnink et al. [9] | SARS-CoV-2_80_LEFT  | 68.9                   | 0.000                   | 0.000                  | 0                |
| Munnink et al. [9] | SARS-CoV-2_80_RIGHT | 67.1                   | 0.000                   | 0.000                  | 0                |
| Munnink et al. [9] | SARS-CoV-2_81_LEFT  | 65.9                   | 0.000                   | 0.000                  | 0                |
| Munnink et al. [9] | SARS-CoV-2_81_RIGHT | 66.9                   | 0.000                   | 0.000                  | 0                |
| Munnink et al. [9] | SARS-CoV-2_82_LEFT  | 68.9                   | 0.000                   | 0.000                  | 0                |
| Munnink et al. [9] | SARS-CoV-2_82_RIGHT | 68.7                   | 0.000                   | 0.000                  | 0                |

(continued on next page)

(Table S7, non-SARS coverage, continued)

| Set                | Primer/probe        | $T_{\text{ref.}}$ (°C) | $C_{\text{strict}}$ (%) | $C_{\text{part.}}$ (%) | $N_{\text{imp}}$ |
|--------------------|---------------------|------------------------|-------------------------|------------------------|------------------|
| Munnink et al. [9] | SARS-CoV-2_83_LEFT  | 70.0                   | 0.000                   | 0.000                  | 0                |
| Munnink et al. [9] | SARS-CoV-2_83_RIGHT | 65.7                   | 0.000                   | 0.000                  | 0                |
| Munnink et al. [9] | SARS-CoV-2_84_LEFT  | 72.3                   | 0.000                   | 0.000                  | 0                |
| Munnink et al. [9] | SARS-CoV-2_84_RIGHT | 64.6                   | 0.000                   | 0.000                  | 0                |
| Munnink et al. [9] | SARS-CoV-2_85_LEFT  | 69.8                   | 0.000                   | 0.000                  | 0                |
| Munnink et al. [9] | SARS-CoV-2_85_RIGHT | 67.8                   | 0.000                   | 0.000                  | 0                |
| Munnink et al. [9] | SARS-CoV-2_86_LEFT  | 67.0                   | 0.000                   | 0.000                  | 0                |
| Munnink et al. [9] | SARS-CoV-2_86_RIGHT | 68.3                   | 0.000                   | 0.000                  | 0                |
| Munnink et al. [9] | SARS-CoV-2_87_LEFT  | 69.1                   | 0.000                   | 0.000                  | 0                |
| Munnink et al. [9] | SARS-CoV-2_87_RIGHT | 69.8                   | 0.000                   | 0.000                  | 0                |
| Munnink et al. [9] | SARS-CoV-2_88_LEFT  | 68.4                   | 0.000                   | 0.000                  | 0                |
| Munnink et al. [9] | SARS-CoV-2_88_RIGHT | 68.5                   | 0.000                   | 0.000                  | 0                |
| Munnink et al. [9] | SARS-CoV-2_89_LEFT  | 66.9                   | 0.000                   | 0.000                  | 0                |
| Munnink et al. [9] | SARS-CoV-2_89_RIGHT | 68.3                   | 0.000                   | 0.000                  | 0                |
| Nalla et al. [10]  | nCoV_2019-F         | 66.3                   | 0.000                   | 0.000                  | 0                |
| Nalla et al. [10]  | nCoV_2019-P1        | 51.8                   | 68.7                    | 68.7                   | 0                |
| Nalla et al. [10]  | nCoV_2019-P2        | 54.8                   | 16.9                    | 16.9                   | 0                |
| Nalla et al. [10]  | nCoV_2019-R         | 68.0                   | 0.000                   | 0.000                  | 0                |
| Niu et al. [11]    | E-F                 | 59.2                   | 0.000                   | 0.000                  | 0                |
| Niu et al. [11]    | E-P                 | 84.2                   | 0.000                   | 0.000                  | 0                |
| Niu et al. [11]    | E-R                 | 57.6                   | 0.000                   | 0.000                  | 0                |

(continued on next page)

(Table S7, non-SARS coverage, continued)

| Set              | Primer/probe             | $T_{ref.}$ (°C) | $C_{strict}$ (%) | $C_{part.}$ (%) | $N_{imp}$ |
|------------------|--------------------------|-----------------|------------------|-----------------|-----------|
| Niu et al. [11]  | RdRp-F                   | 64.6            | 0.000            | 0.000           | 0         |
| Niu et al. [11]  | RdRp-P                   | 60.8            | 0.000            | 0.000           | 0         |
| Niu et al. [11]  | RdRp-R                   | 68.4            | 0.000            | 0.000           | 0         |
| Park et al. [12] | SARS-CoV-2_IBS_E2-F      | 65.2            | 0.000            | 0.000           | 0         |
| Park et al. [12] | SARS-CoV-2_IBS_E2-R      | 61.3            | 0.000            | 0.000           | 0         |
| Park et al. [12] | SARS-CoV-2_IBS_N1-F      | 63.3            | 0.000            | 0.000           | 0         |
| Park et al. [12] | SARS-CoV-2_IBS_N1-R      | 63.9            | 0.000            | 0.000           | 0         |
| Park et al. [12] | SARS-CoV-2_IBS_RdRP2-F   | 63.8            | 0.000            | 0.000           | 0         |
| Park et al. [12] | SARS-CoV-2_IBS_RdRP2-R   | 64.5            | 0.000            | 0.000           | 0         |
| Park et al. [12] | SARS-CoV-2_IBS_S2-F      | 63.7            | 0.000            | 0.000           | 0         |
| Park et al. [12] | SARS-CoV-2_IBS_S2-R      | 61.6            | 0.000            | 0.000           | 0         |
| Park et al. [12] | SARS-CoV-2_IBS_m_N1-F    | 60.8            | 0.000            | 0.000           | 0         |
| Park et al. [12] | SARS-CoV-2_IBS_m_N1-R    | 65.4            | 0.000            | 0.000           | 0         |
| Park et al. [12] | SARS-CoV-2_IBS_m_N2-F    | 60.3            | 0.000            | 0.000           | 0         |
| Park et al. [12] | SARS-CoV-2_IBS_m_N2-R    | 62.4            | 0.000            | 0.000           | 0         |
| Park et al. [12] | SARS-CoV-2_IBS_m_RdRP1-F | 62.7            | 0.000            | 0.000           | 0         |
| Park et al. [12] | SARS-CoV-2_IBS_m_RdRP1-R | 60.8            | 0.000            | 0.000           | 0         |
| Park et al. [12] | SARS-CoV-2_IBS_m_RdRP2-F | 62.9            | 0.000            | 0.000           | 0         |
| Park et al. [12] | SARS-CoV-2_IBS_m_RdRP2-R | 62.2            | 0.000            | 0.000           | 0         |
| Park et al. [12] | SARS-CoV-2_IBS_m_S1-F    | 62.5            | 0.000            | 0.000           | 0         |
| Park et al. [12] | SARS-CoV-2_IBS_m_S1-R    | 59.3            | 0.000            | 0.000           | 0         |

(continued on next page)

(Table S7, non-SARS coverage, continued)

| Set                | Primer/probe          | $T_{ref.}$ (°C) | $C_{strict}$ (%) | $C_{part.}$ (%) | $N_{imp}$ |
|--------------------|-----------------------|-----------------|------------------|-----------------|-----------|
| Park et al. [12]   | SARS-CoV-2_IBS_m_S2-F | 61.4            | 0.000            | 0.000           | 0         |
| Park et al. [12]   | SARS-CoV-2_IBS_m_S2-R | 60.3            | 0.000            | 0.000           | 0         |
| Rahman et al. [13] | M-F                   | 68.9            | 0.000            | 0.000           | 0         |
| Rahman et al. [13] | M-P                   | 70.9            | 0.000            | 0.000           | 0         |
| Rahman et al. [13] | M-R                   | 66.3            | 0.000            | 0.000           | 0         |
| Rahman et al. [13] | ORF1b-F               | 65.5            | 0.000            | 0.000           | 0         |
| Rahman et al. [13] | ORF1b-P               | 76.1            | 0.000            | 0.000           | 0         |
| Rahman et al. [13] | ORF1b-R               | 64.2            | 0.000            | 0.000           | 0         |
| Toptan et al. [14] | M-475-F               | 64.8            | 0.000            | 0.000           | 0         |
| Toptan et al. [14] | M-507-P               | 63.5            | 0.000            | 0.000           | 0         |
| Toptan et al. [14] | M-574-R               | 65.4            | 0.000            | 0.000           | 0         |
| Toptan et al. [14] | S-1850-F              | 64.6            | 0.000            | 0.000           | 0         |
| Toptan et al. [14] | S-1884-P              | 62.2            | 0.000            | 0.000           | 0         |
| Toptan et al. [14] | S-1949-R              | 63.0            | 0.000            | 0.000           | 0         |
| Vogels et al. [15] | HKU-N-F               | 58.6            | 0.000            | 0.000           | 0         |
| Vogels et al. [15] | HKU-N-P               | 63.0            | 0.000            | 0.000           | 0         |
| Vogels et al. [15] | HKU-N-R               | 60.3            | 0.000            | 0.000           | 0         |
| Vogels et al. [15] | HKU-ORF1-F1           | 61.7            | 0.000            | 0.000           | 0         |
| Vogels et al. [15] | HKU-ORF1-F2           | 64.6            | 0.000            | 0.000           | 0         |
| Vogels et al. [15] | HKU-ORF1-F3           | 58.7            | 0.000            | 0.000           | 0         |
| Vogels et al. [15] | HKU-ORF1-F4           | 61.7            | 0.000            | 0.000           | 0         |

(continued on next page)

(Table S7, non-SARS coverage, continued)

| Set                | Primer/probe         | $T_{\text{ref.}}$ (°C) | $C_{\text{strict}}$ (%) | $C_{\text{part.}}$ (%) | $N_{\text{imp}}$ |
|--------------------|----------------------|------------------------|-------------------------|------------------------|------------------|
| Vogels et al. [15] | HKU-ORF1-P1          | 64.5                   | 0.000                   | 0.000                  | 0                |
| Vogels et al. [15] | HKU-ORF1-P2          | 63.6                   | 0.000                   | 0.000                  | 0                |
| Vogels et al. [15] | HKU-ORF1-R1          | 61.7                   | 0.000                   | 0.000                  | 0                |
| Vogels et al. [15] | HKU-ORF1-R2          | 65.5                   | 0.000                   | 0.000                  | 0                |
| WHO                | NIID_WH-1_F24381     | 61.2                   | 0.000                   | 0.000                  | 0                |
| WHO                | NIID_WH-1_F501       | 70.3                   | 0.000                   | 0.000                  | 0                |
| WHO                | NIID_WH-1_F509       | 63.3                   | 0.000                   | 0.000                  | 0                |
| WHO                | NIID_WH-1_R24873     | 61.5                   | 0.000                   | 0.000                  | 0                |
| WHO                | NIID_WH-1_R854       | 61.7                   | 0.000                   | 0.000                  | 0                |
| WHO                | NIID_WH-1_R913       | 69.2                   | 0.000                   | 0.000                  | 0                |
| WHO                | NIID_WH-1_Seq_F24383 | 60.4                   | 0.000                   | 0.000                  | 0                |
| WHO                | NIID_WH-1_Seq_F519   | 58.8                   | 0.000                   | 0.000                  | 0                |
| WHO                | NIID_WH-1_Seq_R24865 | 60.1                   | 0.000                   | 0.000                  | 0                |
| WHO                | NIID_WH-1_Seq_R840   | 60.2                   | 0.000                   | 0.000                  | 0                |
| WHO                | WH-NICN-F            | 64.4                   | 0.000                   | 0.000                  | 0                |
| WHO                | WH-NICN-P            | 51.3                   | 0.000                   | 0.000                  | 0                |
| WHO                | WH-NICN-R            | 64.1                   | 0.000                   | 0.000                  | 0                |
| WHO                | WuhanCoV-spk1-f      | 65.4                   | 0.000                   | 0.000                  | 0                |
| WHO                | WuhanCoV-spk2-r      | 64.6                   | 0.000                   | 0.000                  | 0                |
| WHO                | nCoV_IP2-12669Fw     | 54.3                   | 0.000                   | 0.000                  | 0                |
| WHO                | nCoV_IP2-12696bProbe | 67.0                   | 0.000                   | 0.000                  | 0                |

(continued on next page)

(Table S7, non-SARS coverage, continued)

| Set             | Primer/probe        | $T_{ref.}$ (°C) | $C_{strict}$ (%) | $C_{part.}$ (%) | $N_{imp}$ |
|-----------------|---------------------|-----------------|------------------|-----------------|-----------|
| WHO             | nCoV_IP2-12759Rv    | 53.7            | 0.000            | 0.000           | 0         |
| WHO             | nCoV_IP4-14059Fw    | 54.8            | 0.000            | 0.000           | 0         |
| WHO             | nCoV_IP4-14084Probe | 61.3            | 0.000            | 0.000           | 0         |
| WHO             | nCoV_IP4-14146Rv    | 54.8            | 0.000            | 0.000           | 0         |
| Yip et al. [16] | nsp2f               | 63.4            | 0.000            | 0.000           | 0         |
| Yip et al. [16] | nsp2r               | 61.4            | 0.000            | 0.000           | 0         |

## References

- [1] B. Bhadra, S. Jalali, V. K. Patel, S. Dasgupta, A. Sapre, Detection of SARS-CoV-2 using high-throughput PCR, *Journal of Applied Biology & Biotechnology* .
- [2] V. M. Corman, O. Landt, M. Kaiser, R. Molenkamp, A. Meijer, D. K. Chu, T. Bleicker, S. Brünink, J. Schneider, M. L. Schmidt, et al., Detection of 2019 novel coronavirus (2019-nCoV) by real-time RT-PCR, *Eurosurveillance* 25 (3) (2020) 2000045.
- [3] J. N. Davda, K. Frank, S. Prakash, G. Purohit, D. P. Vijayashankar, D. Vedagiri, K. B. Tallapaka, K. H. Harshan, A. B. Siva, R. K. Mishra, et al., An Inexpensive RT-PCR Endpoint Diagnostic Assay for SARS-CoV-2 Using Nested PCR: Direct Assessment of Detection Efficiency of RT-qPCR Tests and Suitability for Surveillance, *bioRxiv* .
- [4] P. R. Grant, M. A. Turner, G. Y. Shin, E. Nastouli, L. J. Levett, Extraction-free COVID-19 (SARS-CoV-2) diagnosis by RT-PCR to increase capacity for national testing programmes during a pandemic, *BioRxiv* .
- [5] Y. Hirotsu, H. Mochizuki, M. Omata, Double-Quencher Probes Improved the Detection Sensitivity of Severe Acute Respiratory Syndrome Coronavirus 2 (SARS-CoV-2) by One-Step RT-PCR, *medRxiv* .
- [6] D. C. Lanza, J. P. Lima, S. M. Jerônimo, Design and in silico validation of polymerase chain reaction primers to detect severe acute respiratory syndrome coronavirus 2 (SARS-CoV-2) .
- [7] C. Li, D. Debruyne, J. Spencer, V. Kapoor, L. Y. Liu, B. Zhang, L. Lee, R. Feigelman, G. Burdon, J. Liu, et al., High sensitivity detection of SARS-CoV-2 using multiplex PCR and a multiplex-PCR-based metagenomic method, *bioRxiv* .
- [8] R. Lu, X. Zhao, J. Li, P. Niu, B. Yang, H. Wu, W. Wang, H. Song, B. Huang, N. Zhu, et al., Genomic characterisation and epidemiology of 2019 novel coronavirus: implications for virus origins and receptor binding, *The Lancet* 395 (10224) (2020) 565–574.
- [9] B. B. O. Munnink, D. F. Nieuwenhuijse, M. Stein, A. O’Toole, M. Haverkate, M. Mollers, S. K. Kamga, C. Schapendonk, P. Lexmond, M. Pronk, et al., Rapid SARS-CoV-2 whole genome sequencing for informed public health decision making in the Netherlands, *bioRxiv* .
- [10] A. K. Nalla, A. M. Casto, M.-L. W. Huang, G. A. Perchetti, R. Sampoleo, L. Shrestha, Y. Wei, H. Zhu, K. R. Jerome, A. L. Greninger, Comparative performance of SARS-CoV-2 detection assays using seven different primer-probe sets and one assay kit, *Journal of clinical microbiology* 58 (6).

- [11] P. Niu, R. Lu, L. Zhao, H. Wang, B. Huang, F. Ye, W. Wang, W. Tan, Three novel real-time RT-PCR assays for detection of COVID-19 virus, *China CDC Weekly* (2020) 1–5.
- [12] M. Park, J. Won, B. Y. Choi, C. J. Lee, Optimization of primer sets and detection protocols for SARS-CoV-2 of coronavirus disease 2019 (COVID-19) using PCR and real-time PCR, *Experimental & molecular medicine* 52 (6) (2020) 963–977.
- [13] H. Rahman, I. Carter, K. Basile, L. Donovan, S. Kumar, T. Tran, D. Ko, S. Alderson, T. Sivaruban, J.-S. Eden, et al., Interpret with caution: An evaluation of the commercial AusDiagnostics versus in-house developed assays for the detection of SARS-CoV-2 virus, *Journal of Clinical Virology* (2020) 104374.
- [14] T. Toptan, S. Hoehl, S. Westhaus, D. Bojkova, A. Berger, B. Rotter, K. Hoffmeier, S. Ciesek, M. Widera, Optimized qRT-PCR approach for the detection of intra- and extra-cellular SARS-CoV-2 RNAs, *bioRxiv* URL <https://www.biorxiv.org/content/early/2020/04/25/2020.04.20.052258>.
- [15] C. B. Vogels, A. F. Brito, A. L. Wyllie, J. R. Fauver, I. M. Ott, C. C. Kalinich, M. E. Petrone, A. Casanovas-Massana, M. C. Muenker, A. J. Moore, et al., Analytical sensitivity and efficiency comparisons of SARS-CoV-2 RT-qPCR primer–probe sets, *Nature microbiology* (2020) 1–7.
- [16] C. C.-Y. Yip, C.-C. Ho, J. F.-W. Chan, K. K.-W. To, H. S.-Y. Chan, S. C.-Y. Wong, K.-H. Leung, A. Y.-F. Fung, A. C.-K. Ng, Z. Zou, et al., Development of a novel, genome subtraction-derived, SARS-CoV-2-specific COVID-19-nsp2 real-time RT-PCR assay and its evaluation using clinical specimens, *International journal of molecular sciences* 21 (7) (2020) 2574.
